# Supplementary material for: Face Your Fears: Virtual reality-based cognitive behavioral therapy (VR-CBT) versus standard CBT for paranoia in patients with schizophrenia spectrum disorders: Results of a randomized clinical trial
Source: Research Square preprint supplement (doi:10.21203/rs.3.rs-5593252/v1), 2024-12-12
Supplement: Supplementary file 1 [file 34438b1c1b9e6ea1aa8f8aa9.docx]

# Supplemental text

## Attrition at treatment cessation (3 months) – primary endpoint

Attrition at treatment cessation (3 months) was statistically significantly associated with several variables. Participants lost to follow-up were more likely to report a history of sexual abuse before age 16 and disturbing experiences during psychiatric admission (TALE items 13 and 17). Additionally, these participants had higher scores on Calgary Depression Scale for Schizophrenia (CDSS)(1), lower scores on General Self-Efficacy scale (GSE(2)), and World Health Organization-5 Well Being Index (WHO 5)(3), and lower conscientiousness scores alongside higher neuroticism scores on a Big 5 personality traits 25-items 5-point Likert scale(4).

## Pre-specified outcomes

The primary prespecified outcome was the GPTS subscale part B, Ideas of Persecution (self-report, score range 16-80), measured at treatment cessation (3 months)(5).

The secondary outcomes of paranoia were GPTS subscale part B, *Ideas of Persecution*, measured at follow-up (9 months) and GPTS subscale part A, *Ideas of Social Self-Reference*, measured at treatment cessation (3 months) and follow-up (9 months) (5).

*Other secondary outcomes, all measured at treatment cessation (3 months) and follow-up (9 months), were:*

-The Safety Behavior Questionnaire (SBQ) (semi-structured interview)(6). In the original questionnaire, closed-ended questions are used to uncover common situations that patients with persecutory delusions tend to avoid. Avoidance was the most frequent safety behavior (92%) observed. We decided to include, besides the original open-ended question, supporting closed-ended questions for the second most frequent safety behavior, *In-situation* (68 %)*,* as people with lived experiences, fulfilling eligibility criteria, who provided us with feedback, gave us the impression that these behaviors would often be present in our sample but rarely recognized by patients themselves. Consequently, we selected a list consisting of the most common in-situation behaviors mentioned in the original study, which covered four themes: protection, invisibility, vigilance, and resistance. We further decided to calculate a sub-score of avoidance as this safety behavior is considered especially challenging.

-The Social Interaction Anxiety Scale (SIAS) (﻿self-report) (7,8).

-The Personal and Social Performance Scale (PSP) (semi-structured interview) (9).

-The CANTAB Emotion Recognition Task (ERT) long Caucasian version (social-cognitive test) (10,11). We decided to calculate latency and accuracy both as total scores and sub-scores for each emotion as distinct emotions have shown to be differently impaired in SSD(12,13).

*Exploratory outcomes, measured at treatment cessation (3 months) and follow-up (9 months), were:*

-The Scale for the Assessment of Positive Symptoms (SAPS) (semi-structured interview) (14). Items were assessed based on the recent month.

-The Brief Negative Symptoms Scale (BNSS) (semi-structured interview) (15).

-The Calgary Depression Symptom Scale (CDSS) (semi-structured interview )(1).

-The Cognitive Disturbances scale (COGDIS) (semi-structured interview) (16). One of the COGDIS items, unstable self-referential tendencies, was in our study by default given the highest score of six if participants described paranoia as paranoid ideation or delusion on daily basis. We decided this as less disturbing subtle experiences tend to recede and become obscured when more severe experiences within the same domain emerge(17). COGDIS was performed regardless of current alcohol or other psychoactive substance use.

-The Trauma And Life Events checklist (TALE) (self-report) (18).

-The Brief Core Schema Scale: belief about self and others (BCSS) (self-report) (19,20).

-The General Self-Efficacy scale (GSE) (self-report) (21).

-The Davos Assessment of Cognitive Biases Scale (DACOBS) (self-report) (22).

-The Suicidal Ideation Attributes Scale (SIDAS) (self-report) (23,24).

-The Intentionality Bias Task (IBT) (social-cognitive test) (25). Paradigm was built in E-prime (26). We used a 24-item version(11,25).

-The Trustworthiness task (social-cognitive test) (27).

-The Social Functioning Scale (SFS) (self-report) (28). The SFS prosocial activities subscale was excluded due to its sensitivity to COVID-19 restrictions in Denmark (March 2020-February 2022).

-The Social Skills Performance Assessment (SSPA) (semi-structured roleplay) (29,30). We used the same version used in the SCOPE study and included only items used in the SCOPE study(27).

- The WHO-5 Well Being Index (self-report) (31).

-The EQ-5D-5L (self-report) (32).

A Big-5 personality traits 25 items 5-point Likert scale (self-report) (4) and the Trauma And Life Events checklist (TALE) (self-report) (33) were measured at baseline.

The Client Satisfaction Questionnaire (CSQ) (self-report) was measured at treatment cessation (3 months).

The Revised GPTS (R-GPTS) (self-report) was measured at treatment cessation (3 months) and follow-up (9 months) to conduct a sensitivity analysis (34).

## Igroup Present Questionnaire

Presence in the VR environment was measured by the IPQ(35) administered in the VR-CBT group during session 1 and 9. IPQ consists of three subscales: Spatial presence, Involvement, and Realness with scores ranging from 0-6 for each subscale. Mean score for Spatial presence at session 1 was 4.30 (SD 0.89) and 4.41 (SD 0.85) at session 9. Mean score for Involvement at session 1 was 3.31 (SD 0.96) and 3.35 (SD 0.80) at session 9. Mean score for Realness at session 1 was 3.16 (SD 1.04) and 3.34 (SD 1.02) at session 9. All scores are considered at least “sufficient.”

## Cyber sickness

Cyber sickness was measured using the SSQ(36), which was administered in the VR-CBT group during session 1 and 2. We used an unweighted approach to calculate total scores. Mean total score at session 1 was 6.69 (SD 7.68; range: 0-41) and mean total score at session 2 was 6.10 (SD 7.29; range: 0-39). Total scores between 5-10 are considered indicative of “minimal symptoms”(36).

1. D A, J A, E M-T. Assessing depression in schizophrenia: the Calgary Depression Scale. Br J Psychiatry Suppl [Internet]. 1993 [cited 2021 Jul 23];163(22):39–44. Available from: https://pubmed.ncbi.nlm.nih.gov/8110442/

2. A L, U S, R S. The general self-efficacy scale: multicultural validation studies. J Psychol [Internet]. 2005 Sep 1 [cited 2021 Jul 23];139(5):439–57. Available from: https://pubmed.ncbi.nlm.nih.gov/16285214/

3. Newnham EA, Hooke GR, Page AC. Monitoring treatment response and outcomes using the World Health Organization’s Wellbeing Index in psychiatric care. J Affect Disord [Internet]. 2010 Apr [cited 2024 Jun 7];122(1–2):133–8. Available from: https://pubmed.ncbi.nlm.nih.gov/19592116/

4. Goldberg LR. The Development of Markers for the Big-Five Factor Structure. Psychol Assess [Internet]. 1992 [cited 2021 Jul 23];4(1):26–42. Available from: https://psycnet.apa.org/journals/pas/4/1/26

5. CE G, D F, E K, P B, D F, G D, et al. Measuring ideas of persecution and social reference: the Green et al. Paranoid Thought Scales (GPTS). Psychol Med [Internet]. 2008 Jan [cited 2021 Jul 23];38(1):101–11. Available from: https://pubmed.ncbi.nlm.nih.gov/17903336/

6. Freeman D, Garety PA, Kuipers E. Persecutory delusions: Developing the understanding of belief maintenance and emotional distress. Psychol Med. 2001;31(7):1293–306.

7. RP M, JC C. Development and validation of measures of social phobia scrutiny fear and social interaction anxiety. Behav Res Ther [Internet]. 1998 Apr [cited 2021 Jul 23];36(4):455–70. Available from: https://pubmed.ncbi.nlm.nih.gov/9670605/

8. Kingsep P, Nathan P, Castle D. Cognitive behavioural group treatment for social anxiety in schizophrenia. Schizophr Res [Internet]. 2003 Sep 1 [cited 2022 Apr 12];63(1–2):121–9. Available from: https://pubmed.ncbi.nlm.nih.gov/12892866/

9. H N, P M, DD G. Reliability, validity and ability to detect change of the Personal and Social Performance scale in patients with stable schizophrenia. Psychiatry Res [Internet]. 2008 Nov 30 [cited 2021 Jul 23];161(2):213–24. Available from: https://pubmed.ncbi.nlm.nih.gov/18848731/

10. Computerized assessment in neuropsychiatry using CANTAB: discussion paper - PubMed [Internet]. [cited 2021 Jul 23]. Available from: https://pubmed.ncbi.nlm.nih.gov/1629849/

11. Pinkham AE, Harvey PD, Penn DL. Social Cognition Psychometric Evaluation: Results of the Final Validation Study. Schizophr Bull [Internet]. 2018 Jun 6 [cited 2024 May 17];44(4):737–48. Available from: https://pubmed.ncbi.nlm.nih.gov/28981848/

12. Savla GN, Vella L, Armstrong CC, Penn DL, Twamley EW. Deficits in domains of social cognition in schizophrenia: a meta-analysis of the empirical evidence. Schizophr Bull [Internet]. 2013 Sep [cited 2024 Nov 25];39(5):979–92. Available from: https://pubmed.ncbi.nlm.nih.gov/22949733/

13. Barkl SJ, Lah S, Harris AWF, Williams LM. Facial emotion identification in early-onset and first-episode psychosis: a systematic review with meta-analysis. Schizophr Res [Internet]. 2014 Oct 1 [cited 2024 Nov 25];159(1):62–9. Available from: https://pubmed.ncbi.nlm.nih.gov/25178803/

14. NC A, M F, VW S, G T, S A. Positive and negative symptoms in schizophrenia. A critical reappraisal. Arch Gen Psychiatry [Internet]. 1990 [cited 2021 Jul 23];47(7):615–21. Available from: https://pubmed.ncbi.nlm.nih.gov/2360855/

15. A M, S G, E M, A R, P R, P B, et al. The Brief Negative Symptom Scale (BNSS): Independent validation in a large sample of Italian patients with schizophrenia. Eur Psychiatry [Internet]. 2015 Jul 1 [cited 2021 Jul 23];30(5):641–7. Available from: https://pubmed.ncbi.nlm.nih.gov/25758156/

16. Schultze-Lutter F, Ruhrmann S, Fusar-Poli P, Bechdolf A, G. Schimmelmann B, Klosterkotter J. Basic Symptoms and the Prediction of First-Episode Psychosis. Curr Pharm Des. 2012;18(4):351–7.

17. Parnas J, Møller P, Kircher T, Thalbitzer J, Jansson L, Handest P, et al. EASE: Examination of anomalous self-experience. Psychopathology. 2005;38(5):236–58.

18. Carr S, Hardy A, Fornells-Ambrojo M. The Trauma and Life Events (TALE) checklist: development of a tool for improving routine screening in people with psychosis. Eur J Psychotraumatol [Internet]. 2018;9(1). Available from: https://doi.org/10.1080/20008198.2018.1512265

19. Faustino B. Maladaptive and Adaptive Cognitions About the Self and Others: Confirmatory Factor Analysis of the Brief Core Schemas Scales. Psychol Rep [Internet]. 2023 Jun 1 [cited 2024 Jun 5];126(3):1445–60. Available from: https://pubmed.ncbi.nlm.nih.gov/35015611/

20. D F, D F, B S, E K, P B, H B, et al. The Brief Core Schema Scales (BCSS): psychometric properties and associations with paranoia and grandiosity in non-clinical and psychosis samples. Psychol Med [Internet]. 2006 Jun [cited 2021 Jul 23];36(6):749–59. Available from: https://pubmed.ncbi.nlm.nih.gov/16563204/

21. Luszczynska A, Scholz U, Schwarzer R. The general self-efficacy scale: multicultural validation studies. J Psychol [Internet]. 2005 Sep 1 [cited 2024 Jun 7];139(5):439–57. Available from: https://pubmed.ncbi.nlm.nih.gov/16285214/

22. Van der Gaag M, Schütz C, ten Napel A, Landa Y, Delespaul P, Bak M, et al. Development of the Davos assessment of cognitive biases scale (DACOBS). Schizophr Res [Internet]. 2013 Mar [cited 2024 Jun 6];144(1–3):63–71. Available from: https://pubmed.ncbi.nlm.nih.gov/23332365/

23. BA van S, PJ B, AL C, L F, H C, J R, et al. The suicidal ideation attributes scale (SIDAS): Community-based validation study of a new scale for the measurement of suicidal ideation. Suicide Life Threat Behav [Internet]. 2014 [cited 2021 Jul 23];44(4):408–19. Available from: https://pubmed.ncbi.nlm.nih.gov/24612048/

24. Harris K, Haddock G, Peters S, Gooding P. Psychometric properties of the Suicidal Ideation Attributes Scale (SIDAS) in a longitudinal sample of people experiencing non-affective psychosis. BMC Psychiatry [Internet]. 2021 Dec 1 [cited 2024 Jun 5];21(1). Available from: https://pubmed.ncbi.nlm.nih.gov/34915870/

25. Buck B, Hester NR, Pinkham A, Harvey PD, Fredrik Jarskog L, Penn DL. The bias toward intentionality in schizophrenia: Automaticity, context, and relationships to symptoms and functioning. J Abnorm Psychol [Internet]. 2018 Jul 1 [cited 2024 Sep 9];127(5):503–12. Available from: https://pubmed.ncbi.nlm.nih.gov/30010368/

26. E-Prime® Stimulus Presentation Software | Psychology Software Tools [Internet]. [cited 2024 Dec 5]. Available from: https://pstnet.com/products/e-prime/

27. Pinkham AE, Penn DL, Green MF, Harvey PD. Social Cognition Psychometric Evaluation: Results of the Initial Psychometric Study. Schizophr Bull [Internet]. 2016 Mar 1 [cited 2024 Sep 9];42(2):494–504. Available from: https://pubmed.ncbi.nlm.nih.gov/25943125/

28. M B, J S, R C, S W, S C. The Social Functioning Scale. The development and validation of a new scale of social adjustment for use in family intervention programmes with schizophrenic patients. Br J Psychiatry [Internet]. 1990 [cited 2021 Jul 23];157(DEC.):853–9. Available from: https://pubmed.ncbi.nlm.nih.gov/2289094/

29. TL P, S M, CL M, K D, DV J. Social skills performance assessment among older patients with schizophrenia. Schizophr Res [Internet]. 2001 Mar 30 [cited 2021 Jul 23];48(2–3):351–60. Available from: https://pubmed.ncbi.nlm.nih.gov/11295387/

30. Pinkham AE, Harvey PD, Penn DL. Social Cognition Psychometric Evaluation: Results of the Final Validation Study. Schizophr Bull [Internet]. 2018 Jun 6 [cited 2023 Nov 24];44(4):737–48. Available from: https://pubmed.ncbi.nlm.nih.gov/28981848/

31. EA N, GR H, AC P. Monitoring treatment response and outcomes using the World Health Organization’s Wellbeing Index in psychiatric care. J Affect Disord [Internet]. 2010 Apr [cited 2021 Jul 23];122(1–2):133–8. Available from: https://pubmed.ncbi.nlm.nih.gov/19592116/

32. EQ-5D-5L – EQ-5D [Internet]. [cited 2021 Jul 23]. Available from: https://euroqol.org/eq-5d-instruments/eq-5d-5l-about/

33. S C, A H, M F-A. The Trauma and Life Events (TALE) checklist: development of a tool for improving routine screening in people with psychosis. Eur J Psychotraumatol [Internet]. 2018 Jan 1 [cited 2021 Jul 23];9(1). Available from: https://pubmed.ncbi.nlm.nih.gov/30220986/

34. Freeman D, Loe BS, Kingdon D, Startup H, Molodynski A, Rosebrock L, et al. The revised Green et al., Paranoid Thoughts Scale (R-GPTS): Psychometric properties, severity ranges, and clinical cut-offs. Psychol Med. 2021;51(2):244–53.

35. Schubert T, Friedmann F, Regenbrecht H. The experience of presence: Factor analytic insights. Presence Teleoperators Virtual Environ. 2001 Jun;10(3):266–81.

36. Brown P, Spronck P, Powell W. The simulator sickness questionnaire, and the erroneous zero baseline assumption. Front Virtual Real. 2022 Sep 6;3.
