# Supplementary material for: Face Your Fears: Virtual reality-based cognitive behavioral therapy (VR-CBT) versus standard CBT for paranoia in patients with schizophrenia spectrum disorders: Results of a randomized clinical trial
Source: Research Square preprint supplement (doi:10.21203/rs.3.rs-5593252/v1), 2024-12-12
Supplement: Supplementary file 2 [file 4b626cc0dc2307529cde3eda.docx]

/*Scewed attrition:

_t0 tale_1_13

_t0 tale_1_17

cdss_totalscore

gse_totalscore

bf_samvittighedsscore (conscientiousness)

bf_neuroscore (neuroticism)

who5_total

*/

/*Scewed baseline

Automatic_t0 (IBT automatic)

tale 4 og tale 8

*/

/*Analysis plan

The planned comparisons between the two groups on continuous outcomes will be carried out with a generalized linear model adjusted for stratification variables (binary gender, study site, and dichotomized symptom severity of GPTS subscale *Ideas of Persecution* of ≥45 or <45), potential baseline imbalances and skewed attrition, with missing data handled by multiple imputations. As an important secondary assessment of this type of outcome, linear mixed model analyses with repeated measurements and an unstructured covariance matrix will assess the interaction term between time and intervention. All analyses will be according to the intention-to-treat principle, analyzing all participants in the groups they were assigned to by randomization; that is all participants irrespective of whether they attended follow-up assessments or not. Primary efficacy analyses will be conducted by a blinded and independent statistician that has no contact with participants in the trial.

Demo_koen = Gender

gpts_b_delscore = GPTS subscale part b, Ideas of Persecution.

*/

//Strat: gpts_b_delscore_t0>=45

//Primary outcome: gpts_b_delscore_t1

use "L:\LovbeskyttetMapper\Face your Fears\Carsten\Final uden randomisering\fyf_wide_for_analysis.dta" ,clear

cd c:\temp

set seed 05090938

keep tale_1_13_t0 tale_1_17_t0 cdss_totalscore_t0 gse_totalscore_t0 bf_samvittigscore_t0 bf_neuroscore_t0 who5_total_t0 ///

gpts_b_delscore_t2 Automatic_t0 trial number tale_1_4_t0 tale_1_8_t0 gpts_b_delscore_t1 gpts_b_delscore_t0 demo_koen_t0 demo_studysite_t0 RANDBLIND

mi set flong

mi register imputed tale_1_13_t0 tale_1_17_t0 cdss_totalscore_t0 gse_totalscore_t0 bf_samvittigscore_t0 bf_neuroscore_t0 who5_total_t0 ///

Automatic_t0 tale_1_4_t0 tale_1_8_t0 gpts_b_delscore_t1 gpts_b_delscore_t2

mi impute mvn tale_1_13_t0 tale_1_17_t0 cdss_totalscore_t0 gse_totalscore_t0 bf_samvittigscore_t0 bf_neuroscore_t0 who5_total_t0 ///

Automatic_t0 tale_1_4_t0 tale_1_8_t0 gpts_b_delscore_t1 gpts_b_delscore_t2 = gpts_b_delscore_t0 demo_koen_t0 demo_studysite_t0, prior(jeffreys) add(100) by(RANDBLIND)

gen strat_gpts= gpts_b_delscore_t0>=45

gen RANDY=RANDBLIND=="Y"

log using "L:\LovbeskyttetMapper\Face your Fears\Carsten\gpts_b_delscore_t1",text replace

//WITHOUT ADJUSTMENT FOR BASELINE IMBALANCES

mi estimate, dots: regress gpts_b_delscore_t1 i.RANDY i.strat_gpts gpts_b_delscore_t0 i.demo_koen_t0 i.demo_studysite_t0

mimrgns i.RANDY

//WITH ADJUSTMENT FOR BASELINE IMBALANCES

mi estimate, dots: regress gpts_b_delscore_t1 i.RANDY i.strat_gpts gpts_b_delscore_t0 i.demo_koen_t0 i.demo_studysite_t0 Automatic_t0 tale_1_4_t0 tale_1_8_t0

mimrgns i.RANDY

log close

log using "L:\LovbeskyttetMapper\Face your Fears\Carsten\gpts_b_delscore_t1",text append

//WITHOUT ADJUSTMENT FOR BASELINE IMBALANCES

mi estimate, dots: regress gpts_b_delscore_t2 i.RANDY i.strat_gpts gpts_b_delscore_t0 i.demo_koen_t0 i.demo_studysite_t0

mimrgns i.RANDY

//WITH ADJUSTMENT FOR BASELINE IMBALANCES

mi estimate, dots: regress gpts_b_delscore_t2 i.RANDY i.strat_gpts gpts_b_delscore_t0 i.demo_koen_t0 i.demo_studysite_t0 Automatic_t0 tale_1_4_t0 tale_1_8_t0

mimrgns i.RANDY

log close

//Mixed model

mi reshape long gpts_b_delscore_t, i(trial number) j(time)

log using "L:\LovbeskyttetMapper\Face your Fears\Carsten\gpts_b_delscore_t1",text append

mi estimate,dots: mixed gpts_b_delscore_t i.RANDY##i.time i.strat_gpts i.demo_koen_t0 i.demo_studysite_t0 || trial number: , noconstant residuals(unstructured,t(time))

mi test 1.RANDY#2.time 1.RANDY#1.time

log close

//Next outcome: gpts_a_delscore_t1

use "L:\LovbeskyttetMapper\Face your Fears\Carsten\Final uden randomisering\fyf_wide_for_analysis.dta" ,clear

cd c:\temp

set seed 05091021

keep tale_1_13_t0 tale_1_17_t0 cdss_totalscore_t0 gse_totalscore_t0 bf_samvittigscore_t0 bf_neuroscore_t0 who5_total_t0 ///

gpts_a_delscore_t2 Automatic_t0 trial number tale_1_4_t0 tale_1_8_t0 gpts_a_delscore_t1 gpts_a_delscore_t0 gpts_b_delscore_t0 demo_koen_t0 demo_studysite_t0 RANDBLIND

mi set flong

mi register imputed tale_1_13_t0 tale_1_17_t0 cdss_totalscore_t0 gse_totalscore_t0 bf_samvittigscore_t0 bf_neuroscore_t0 who5_total_t0 ///

Automatic_t0 tale_1_4_t0 tale_1_8_t0 gpts_a_delscore_t1 gpts_a_delscore_t2

mi impute mvn tale_1_13_t0 tale_1_17_t0 cdss_totalscore_t0 gse_totalscore_t0 bf_samvittigscore_t0 bf_neuroscore_t0 who5_total_t0 ///

Automatic_t0 tale_1_4_t0 tale_1_8_t0 gpts_a_delscore_t1 gpts_a_delscore_t2 = gpts_b_delscore_t0 gpts_a_delscore_t0 demo_koen_t0 demo_studysite_t0, prior(jeffreys) add(100) by(RANDBLIND)

gen strat_gpts= gpts_b_delscore_t0>=45

gen RANDY=RANDBLIND=="Y"

log using "L:\LovbeskyttetMapper\Face your Fears\Carsten\gpts_a_delscore_t1",text replace

//WITHOUT ADJUSTMENT FOR BASELINE IMBALANCES

mi estimate, dots: regress gpts_a_delscore_t1 i.RANDY i.strat_gpts gpts_a_delscore_t0 i.demo_koen_t0 i.demo_studysite_t0

mimrgns i.RANDY

//WITH ADJUSTMENT FOR BASELINE IMBALANCES

mi estimate, dots: regress gpts_a_delscore_t1 i.RANDY i.strat_gpts gpts_a_delscore_t0 i.demo_koen_t0 i.demo_studysite_t0 Automatic_t0 tale_1_4_t0 tale_1_8_t0

mimrgns i.RANDY

log close

log using "L:\LovbeskyttetMapper\Face your Fears\Carsten\gpts_a_delscore_t1",text append

//WITHOUT ADJUSTMENT FOR BASELINE IMBALANCES

mi estimate, dots: regress gpts_a_delscore_t2 i.RANDY i.strat_gpts gpts_a_delscore_t0 i.demo_koen_t0 i.demo_studysite_t0

mimrgns i.RANDY

//WITH ADJUSTMENT FOR BASELINE IMBALANCES

mi estimate, dots: regress gpts_a_delscore_t2 i.RANDY i.strat_gpts gpts_a_delscore_t0 i.demo_koen_t0 i.demo_studysite_t0 Automatic_t0 tale_1_4_t0 tale_1_8_t0

mimrgns i.RANDY

log close

//Mixed model

mi reshape long gpts_a_delscore_t, i(trial number) j(time)

log using "L:\LovbeskyttetMapper\Face your Fears\Carsten\gpts_a_delscore_t1",text append

mi estimate,dots: mixed gpts_a_delscore_t i.RANDY##i.time i.strat_gpts i.demo_koen_t0 i.demo_studysite_t0 || trial number: , noconstant residuals(unstructured,t(time))

mi test 1.RANDY#2.time 1.RANDY#1.time

log close

//Next outcome: psp_total_t1

use "L:\LovbeskyttetMapper\Face your Fears\Carsten\Final uden randomisering\fyf_wide_for_analysis.dta" ,clear

cd c:\temp

set seed 05091031

keep tale_1_13_t0 tale_1_17_t0 cdss_totalscore_t0 gse_totalscore_t0 bf_samvittigscore_t0 bf_neuroscore_t0 who5_total_t0 ///

psp_total_t2 Automatic_t0 trial number tale_1_4_t0 tale_1_8_t0 psp_total_t1 psp_total_t0 gpts_b_delscore_t0 demo_koen_t0 demo_studysite_t0 RANDBLIND

mi set flong

mi register imputed tale_1_13_t0 tale_1_17_t0 cdss_totalscore_t0 gse_totalscore_t0 bf_samvittigscore_t0 bf_neuroscore_t0 who5_total_t0 ///

Automatic_t0 tale_1_4_t0 tale_1_8_t0 psp_total_t1 psp_total_t2

mi impute mvn tale_1_13_t0 tale_1_17_t0 cdss_totalscore_t0 gse_totalscore_t0 bf_samvittigscore_t0 bf_neuroscore_t0 who5_total_t0 ///

Automatic_t0 tale_1_4_t0 tale_1_8_t0 psp_total_t1 psp_total_t2 = gpts_b_delscore_t0 psp_total_t0 demo_koen_t0 demo_studysite_t0, prior(jeffreys) add(100) by(RANDBLIND)

gen strat_gpts= gpts_b_delscore_t0>=45

gen RANDY=RANDBLIND=="Y"

log using "L:\LovbeskyttetMapper\Face your Fears\Carsten\psp_total_t1",text replace

//WITHOUT ADJUSTMENT FOR BASELINE IMBALANCES

mi estimate, dots: regress psp_total_t1 i.RANDY i.strat_gpts psp_total_t0 i.demo_koen_t0 i.demo_studysite_t0

mimrgns i.RANDY

//WITH ADJUSTMENT FOR BASELINE IMBALANCES

mi estimate, dots: regress psp_total_t1 i.RANDY i.strat_gpts psp_total_t0 i.demo_koen_t0 i.demo_studysite_t0 Automatic_t0 tale_1_4_t0 tale_1_8_t0

mimrgns i.RANDY

log close

log using "L:\LovbeskyttetMapper\Face your Fears\Carsten\psp_total_t1",text append

//WITHOUT ADJUSTMENT FOR BASELINE IMBALANCES

mi estimate, dots: regress psp_total_t2 i.RANDY i.strat_gpts psp_total_t0 i.demo_koen_t0 i.demo_studysite_t0

mimrgns i.RANDY

//WITH ADJUSTMENT FOR BASELINE IMBALANCES

mi estimate, dots: regress psp_total_t2 i.RANDY i.strat_gpts psp_total_t0 i.demo_koen_t0 i.demo_studysite_t0 Automatic_t0 tale_1_4_t0 tale_1_8_t0

mimrgns i.RANDY

log close

//Mixed model

mi reshape long psp_total_t, i(trial number) j(time)

log using "L:\LovbeskyttetMapper\Face your Fears\Carsten\psp_total_t1",text append

mi estimate,dots: mixed psp_total_t i.RANDY##i.time i.strat_gpts i.demo_koen_t0 i.demo_studysite_t0 || trial number: , noconstant residuals(unstructured,t(time))

mi test 1.RANDY#2.time 1.RANDY#1.time

log close

//Next outcome: sbq_total_score_t1

use "L:\LovbeskyttetMapper\Face your Fears\Carsten\Final uden randomisering\fyf_wide_for_analysis.dta" ,clear

cd c:\temp

set seed 05091038

keep tale_1_13_t0 tale_1_17_t0 cdss_totalscore_t0 gse_totalscore_t0 bf_samvittigscore_t0 bf_neuroscore_t0 who5_total_t0 ///

sbq_total_score_t2 Automatic_t0 trial number tale_1_4_t0 tale_1_8_t0 sbq_total_score_t1 sbq_total_score_t0 gpts_b_delscore_t0 demo_koen_t0 demo_studysite_t0 RANDBLIND

mi set flong

mi register imputed tale_1_13_t0 tale_1_17_t0 cdss_totalscore_t0 gse_totalscore_t0 bf_samvittigscore_t0 bf_neuroscore_t0 who5_total_t0 ///

Automatic_t0 tale_1_4_t0 tale_1_8_t0 sbq_total_score_t1 sbq_total_score_t2

mi impute mvn tale_1_13_t0 tale_1_17_t0 cdss_totalscore_t0 gse_totalscore_t0 bf_samvittigscore_t0 bf_neuroscore_t0 who5_total_t0 ///

Automatic_t0 tale_1_4_t0 tale_1_8_t0 sbq_total_score_t1 sbq_total_score_t2 = gpts_b_delscore_t0 sbq_total_score_t0 demo_koen_t0 demo_studysite_t0, prior(jeffreys) add(100) by(RANDBLIND)

gen strat_gpts= gpts_b_delscore_t0>=45

gen RANDY=RANDBLIND=="Y"

log using "L:\LovbeskyttetMapper\Face your Fears\Carsten\sbq_total_score_t1",text replace

//WITHOUT ADJUSTMENT FOR BASELINE IMBALANCES

mi estimate, dots: regress sbq_total_score_t1 i.RANDY i.strat_gpts sbq_total_score_t0 i.demo_koen_t0 i.demo_studysite_t0

mimrgns i.RANDY

//WITH ADJUSTMENT FOR BASELINE IMBALANCES

mi estimate, dots: regress sbq_total_score_t1 i.RANDY i.strat_gpts sbq_total_score_t0 i.demo_koen_t0 i.demo_studysite_t0 Automatic_t0 tale_1_4_t0 tale_1_8_t0

mimrgns i.RANDY

log close

log using "L:\LovbeskyttetMapper\Face your Fears\Carsten\sbq_total_score_t1",text append

//WITHOUT ADJUSTMENT FOR BASELINE IMBALANCES

mi estimate, dots: regress sbq_total_score_t2 i.RANDY i.strat_gpts sbq_total_score_t0 i.demo_koen_t0 i.demo_studysite_t0

mimrgns i.RANDY

//WITH ADJUSTMENT FOR BASELINE IMBALANCES

mi estimate, dots: regress sbq_total_score_t2 i.RANDY i.strat_gpts sbq_total_score_t0 i.demo_koen_t0 i.demo_studysite_t0 Automatic_t0 tale_1_4_t0 tale_1_8_t0

mimrgns i.RANDY

log close

//Mixed model

mi reshape long sbq_total_score_t, i(trial number) j(time)

log using "L:\LovbeskyttetMapper\Face your Fears\Carsten\sbq_total_score_t1",text append

mi estimate,dots: mixed sbq_total_score_t i.RANDY##i.time i.strat_gpts i.demo_koen_t0 i.demo_studysite_t0 || trial number: , noconstant residuals(unstructured,t(time))

mi test 1.RANDY#2.time 1.RANDY#1.time

log close

//Next outcome: sbq_avoid_t1

use "L:\LovbeskyttetMapper\Face your Fears\Carsten\Final uden randomisering\fyf_wide_for_analysis.dta" ,clear

egen sbq_avoid_t1=rowtotal(sbq_1_fre*_t1 sbq_butik_frekvens_t1 sbq_transport_frekvens_t1 sbq_bar_frekvens_t1 sbq_restaurant_frekvens_t1 sbq_moede_frekvens_t1 sbq_aabne_frekvens_t1 sbq_lukke_frekvens_t1 sbq_hjemme_frekvens_t1 sbq_hos_andre_frekvens_t1 sbq_langt_hjem_frekvens_t1 sbq_gade_frekvens_t1 sbq_spise_frekvens_t1), missing

egen sbq_avoid_t2=rowtotal(sbq_1_fre*_t2 sbq_butik_frekvens_t2 sbq_transport_frekvens_t2 sbq_bar_frekvens_t2 sbq_restaurant_frekvens_t2 sbq_moede_frekvens_t2 sbq_aabne_frekvens_t2 sbq_lukke_frekvens_t2 sbq_hjemme_frekvens_t2 sbq_hos_andre_frekvens_t2 sbq_langt_hjem_frekvens_t2 sbq_gade_frekvens_t2 sbq_spise_frekvens_t2), missing

cd c:\temp

set seed 05091038

keep tale_1_13_t0 tale_1_17_t0 cdss_totalscore_t0 gse_totalscore_t0 bf_samvittigscore_t0 bf_neuroscore_t0 who5_total_t0 ///

sbq_avoid_t2 Automatic_t0 trial number tale_1_4_t0 tale_1_8_t0 sbq_avoid_t1 sbq_avoid_t0 gpts_b_delscore_t0 demo_koen_t0 demo_studysite_t0 RANDBLIND

mi set flong

mi register imputed tale_1_13_t0 tale_1_17_t0 cdss_totalscore_t0 gse_totalscore_t0 bf_samvittigscore_t0 bf_neuroscore_t0 who5_total_t0 ///

Automatic_t0 tale_1_4_t0 tale_1_8_t0 sbq_avoid_t1 sbq_avoid_t2

mi impute mvn tale_1_13_t0 tale_1_17_t0 cdss_totalscore_t0 gse_totalscore_t0 bf_samvittigscore_t0 bf_neuroscore_t0 who5_total_t0 ///

Automatic_t0 tale_1_4_t0 tale_1_8_t0 sbq_avoid_t1 sbq_avoid_t2 = gpts_b_delscore_t0 sbq_avoid_t0 demo_koen_t0 demo_studysite_t0, prior(jeffreys) add(100) by(RANDBLIND)

gen strat_gpts= gpts_b_delscore_t0>=45

gen RANDY=RANDBLIND=="Y"

log using "L:\LovbeskyttetMapper\Face your Fears\Carsten\sbq_avoid_t1",text replace

//WITHOUT ADJUSTMENT FOR BASELINE IMBALANCES

mi estimate, dots: regress sbq_avoid_t1 i.RANDY i.strat_gpts sbq_avoid_t0 i.demo_koen_t0 i.demo_studysite_t0

mimrgns i.RANDY

//WITH ADJUSTMENT FOR BASELINE IMBALANCES

mi estimate, dots: regress sbq_avoid_t1 i.RANDY i.strat_gpts sbq_avoid_t0 i.demo_koen_t0 i.demo_studysite_t0 Automatic_t0 tale_1_4_t0 tale_1_8_t0

mimrgns i.RANDY

log close

log using "L:\LovbeskyttetMapper\Face your Fears\Carsten\sbq_avoid_t1",text append

//WITHOUT ADJUSTMENT FOR BASELINE IMBALANCES

mi estimate, dots: regress sbq_avoid_t2 i.RANDY i.strat_gpts sbq_avoid_t0 i.demo_koen_t0 i.demo_studysite_t0

mimrgns i.RANDY

//WITH ADJUSTMENT FOR BASELINE IMBALANCES

mi estimate, dots: regress sbq_avoid_t2 i.RANDY i.strat_gpts sbq_avoid_t0 i.demo_koen_t0 i.demo_studysite_t0 Automatic_t0 tale_1_4_t0 tale_1_8_t0

mimrgns i.RANDY

log close

//Mixed model

mi reshape long sbq_avoid_t, i(trial number) j(time)

log using "L:\LovbeskyttetMapper\Face your Fears\Carsten\sbq_avoid_t1",text append

mi estimate,dots: mixed sbq_avoid_t i.RANDY##i.time i.strat_gpts i.demo_koen_t0 i.demo_studysite_t0 || trial number: , noconstant residuals(unstructured,t(time))

mi test 1.RANDY#2.time 1.RANDY#1.time

log close

//Next outcome: sias_totalscore_t1

use "L:\LovbeskyttetMapper\Face your Fears\Carsten\Final uden randomisering\fyf_wide_for_analysis.dta" ,clear

cd c:\temp

set seed 05091057

keep tale_1_13_t0 tale_1_17_t0 cdss_totalscore_t0 gse_totalscore_t0 bf_samvittigscore_t0 bf_neuroscore_t0 who5_total_t0 ///

sias_totalscore_t2 Automatic_t0 trial number tale_1_4_t0 tale_1_8_t0 sias_totalscore_t1 sias_totalscore_t0 gpts_b_delscore_t0 demo_koen_t0 demo_studysite_t0 RANDBLIND sbq_avoid_t0

mi set flong

mi register imputed tale_1_13_t0 tale_1_17_t0 cdss_totalscore_t0 gse_totalscore_t0 bf_samvittigscore_t0 bf_neuroscore_t0 who5_total_t0 ///

Automatic_t0 tale_1_4_t0 tale_1_8_t0 sias_totalscore_t1 sias_totalscore_t2 sias_totalscore_t0

mi impute mvn tale_1_13_t0 tale_1_17_t0 cdss_totalscore_t0 gse_totalscore_t0 bf_samvittigscore_t0 bf_neuroscore_t0 who5_total_t0 ///

Automatic_t0 tale_1_4_t0 tale_1_8_t0 sias_totalscore_t0 sias_totalscore_t1 sias_totalscore_t2 = gpts_b_delscore_t0 sbq_avoid_t0 demo_koen_t0 demo_studysite_t0, prior(jeffreys) add(100) by(RANDBLIND)

gen strat_gpts= gpts_b_delscore_t0>=45

gen RANDY=RANDBLIND=="Y"

log using "L:\LovbeskyttetMapper\Face your Fears\Carsten\sias_totalscore_t1",text replace

//WITHOUT ADJUSTMENT FOR BASELINE IMBALANCES

mi estimate, dots: regress sias_totalscore_t1 i.RANDY i.strat_gpts sias_totalscore_t0 i.demo_koen_t0 i.demo_studysite_t0

mimrgns i.RANDY

//WITH ADJUSTMENT FOR BASELINE IMBALANCES

mi estimate, dots: regress sias_totalscore_t1 i.RANDY i.strat_gpts sias_totalscore_t0 i.demo_koen_t0 i.demo_studysite_t0 Automatic_t0 tale_1_4_t0 tale_1_8_t0

mimrgns i.RANDY

log close

log using "L:\LovbeskyttetMapper\Face your Fears\Carsten\sias_totalscore_t1",text append

//WITHOUT ADJUSTMENT FOR BASELINE IMBALANCES

mi estimate, dots: regress sias_totalscore_t2 i.RANDY i.strat_gpts sias_totalscore_t0 i.demo_koen_t0 i.demo_studysite_t0

mimrgns i.RANDY

//WITH ADJUSTMENT FOR BASELINE IMBALANCES

mi estimate, dots: regress sias_totalscore_t2 i.RANDY i.strat_gpts sias_totalscore_t0 i.demo_koen_t0 i.demo_studysite_t0 Automatic_t0 tale_1_4_t0 tale_1_8_t0

mimrgns i.RANDY

log close

//Mixed model

mi reshape long sias_totalscore_t, i(trial number) j(time)

log using "L:\LovbeskyttetMapper\Face your Fears\Carsten\sias_totalscore_t1",text append

mi estimate,dots: mixed sias_totalscore_t i.RANDY##i.time i.strat_gpts i.demo_koen_t0 i.demo_studysite_t0 || trial number: , noconstant residuals(unstructured,t(time))

mi test 1.RANDY#2.time 1.RANDY#1.time

log close

//Next outcome: saps_composite_total_t1

use "L:\LovbeskyttetMapper\Face your Fears\Carsten\Final uden randomisering\fyf_wide_for_analysis.dta" ,clear

cd c:\temp

set seed 05091103

keep tale_1_13_t0 tale_1_17_t0 cdss_totalscore_t0 gse_totalscore_t0 bf_samvittigscore_t0 bf_neuroscore_t0 who5_total_t0 ///

saps_composite_total_t2 Automatic_t0 trial number tale_1_4_t0 tale_1_8_t0 saps_composite_total_t1 saps_composite_total_t0 gpts_b_delscore_t0 demo_koen_t0 demo_studysite_t0 RANDBLIND sbq_avoid_t0

mi set flong

mi register imputed tale_1_13_t0 tale_1_17_t0 cdss_totalscore_t0 gse_totalscore_t0 bf_samvittigscore_t0 bf_neuroscore_t0 who5_total_t0 ///

Automatic_t0 tale_1_4_t0 tale_1_8_t0 saps_composite_total_t1 saps_composite_total_t2 saps_composite_total_t0

mi impute mvn tale_1_13_t0 tale_1_17_t0 cdss_totalscore_t0 gse_totalscore_t0 bf_samvittigscore_t0 bf_neuroscore_t0 who5_total_t0 ///

Automatic_t0 tale_1_4_t0 tale_1_8_t0 saps_composite_total_t0 saps_composite_total_t1 saps_composite_total_t2 = gpts_b_delscore_t0 sbq_avoid_t0 demo_koen_t0 demo_studysite_t0, prior(jeffreys) add(100) by(RANDBLIND)

gen strat_gpts= gpts_b_delscore_t0>=45

gen RANDY=RANDBLIND=="Y"

log using "L:\LovbeskyttetMapper\Face your Fears\Carsten\saps_composite_total_t1",text replace

//WITHOUT ADJUSTMENT FOR BASELINE IMBALANCES

mi estimate, dots: regress saps_composite_total_t1 i.RANDY i.strat_gpts saps_composite_total_t0 i.demo_koen_t0 i.demo_studysite_t0

mimrgns i.RANDY

//WITH ADJUSTMENT FOR BASELINE IMBALANCES

mi estimate, dots: regress saps_composite_total_t1 i.RANDY i.strat_gpts saps_composite_total_t0 i.demo_koen_t0 i.demo_studysite_t0 Automatic_t0 tale_1_4_t0 tale_1_8_t0

mimrgns i.RANDY

log close

log using "L:\LovbeskyttetMapper\Face your Fears\Carsten\saps_composite_total_t1",text append

//WITHOUT ADJUSTMENT FOR BASELINE IMBALANCES

mi estimate, dots: regress saps_composite_total_t2 i.RANDY i.strat_gpts saps_composite_total_t0 i.demo_koen_t0 i.demo_studysite_t0

mimrgns i.RANDY

//WITH ADJUSTMENT FOR BASELINE IMBALANCES

mi estimate, dots: regress saps_composite_total_t2 i.RANDY i.strat_gpts saps_composite_total_t0 i.demo_koen_t0 i.demo_studysite_t0 Automatic_t0 tale_1_4_t0 tale_1_8_t0

mimrgns i.RANDY

log close

//Mixed model

mi reshape long saps_composite_total_t, i(trial number) j(time)

log using "L:\LovbeskyttetMapper\Face your Fears\Carsten\saps_composite_total_t1",text append

mi estimate,dots: mixed saps_composite_total_t i.RANDY##i.time i.strat_gpts i.demo_koen_t0 i.demo_studysite_t0 || trial number: , noconstant residuals(unstructured,t(time))

mi test 1.RANDY#2.time 1.RANDY#1.time

log close

//Next outcome: saps_samletglobal_t1

use "L:\LovbeskyttetMapper\Face your Fears\Carsten\Final uden randomisering\fyf_wide_for_analysis.dta" ,clear

cd c:\temp

set seed 05091108

keep tale_1_13_t0 tale_1_17_t0 cdss_totalscore_t0 gse_totalscore_t0 bf_samvittigscore_t0 bf_neuroscore_t0 who5_total_t0 ///

saps_samletglobal_t2 Automatic_t0 trial number tale_1_4_t0 tale_1_8_t0 saps_samletglobal_t1 saps_samletglobal_t0 gpts_b_delscore_t0 demo_koen_t0 demo_studysite_t0 RANDBLIND sbq_avoid_t0

mi set flong

mi register imputed tale_1_13_t0 tale_1_17_t0 cdss_totalscore_t0 gse_totalscore_t0 bf_samvittigscore_t0 bf_neuroscore_t0 who5_total_t0 ///

Automatic_t0 tale_1_4_t0 tale_1_8_t0 saps_samletglobal_t1 saps_samletglobal_t2 saps_samletglobal_t0

mi impute mvn tale_1_13_t0 tale_1_17_t0 cdss_totalscore_t0 gse_totalscore_t0 bf_samvittigscore_t0 bf_neuroscore_t0 who5_total_t0 ///

Automatic_t0 tale_1_4_t0 tale_1_8_t0 saps_samletglobal_t0 saps_samletglobal_t1 saps_samletglobal_t2 = gpts_b_delscore_t0 sbq_avoid_t0 demo_koen_t0 demo_studysite_t0, prior(jeffreys) add(100) by(RANDBLIND)

gen strat_gpts= gpts_b_delscore_t0>=45

gen RANDY=RANDBLIND=="Y"

log using "L:\LovbeskyttetMapper\Face your Fears\Carsten\saps_samletglobal_t1",text replace

//WITHOUT ADJUSTMENT FOR BASELINE IMBALANCES

mi estimate, dots: regress saps_samletglobal_t1 i.RANDY i.strat_gpts saps_samletglobal_t0 i.demo_koen_t0 i.demo_studysite_t0

mimrgns i.RANDY

//WITH ADJUSTMENT FOR BASELINE IMBALANCES

mi estimate, dots: regress saps_samletglobal_t1 i.RANDY i.strat_gpts saps_samletglobal_t0 i.demo_koen_t0 i.demo_studysite_t0 Automatic_t0 tale_1_4_t0 tale_1_8_t0

mimrgns i.RANDY

log close

log using "L:\LovbeskyttetMapper\Face your Fears\Carsten\saps_samletglobal_t1",text append

//WITHOUT ADJUSTMENT FOR BASELINE IMBALANCES

mi estimate, dots: regress saps_samletglobal_t2 i.RANDY i.strat_gpts saps_samletglobal_t0 i.demo_koen_t0 i.demo_studysite_t0

mimrgns i.RANDY

//WITH ADJUSTMENT FOR BASELINE IMBALANCES

mi estimate, dots: regress saps_samletglobal_t2 i.RANDY i.strat_gpts saps_samletglobal_t0 i.demo_koen_t0 i.demo_studysite_t0 Automatic_t0 tale_1_4_t0 tale_1_8_t0

mimrgns i.RANDY

log close

//Mixed model

mi reshape long saps_samletglobal_t, i(trial number) j(time)

log using "L:\LovbeskyttetMapper\Face your Fears\Carsten\saps_samletglobal_t1",text append

mi estimate,dots: mixed saps_samletglobal_t i.RANDY##i.time i.strat_gpts i.demo_koen_t0 i.demo_studysite_t0 || trial number: , noconstant residuals(unstructured,t(time))

mi test 1.RANDY#2.time 1.RANDY#1.time

log close

//Next outcome: bnss_total_t1

use "L:\LovbeskyttetMapper\Face your Fears\Carsten\Final uden randomisering\fyf_wide_for_analysis.dta" ,clear

egen bnss_total_t1 =rowtotal(bnss_1_t1 bnss_2_t1 bnss_3_t1 bnss_mangel_t1 bnss_asocial_adf_t1 bnss_asocial_sub_t1 bnss_avo_adf_t1 bnss_avo_sub_t1 bnss_daempaff_ansigt_t1 bnss_daempaff_udtryk_t1 bnss_daempaff_gester_t1 bnss_alogia_tale_t1 bnss_alogia_uddybning_t1 ),missing

egen bnss_total_t2 =rowtotal(bnss_1_t2 bnss_2_t2 bnss_3_t2 bnss_mangel_t2 bnss_asocial_adf_t2 bnss_asocial_sub_t2 bnss_avo_adf_t2 bnss_avo_sub_t2 bnss_daempaff_ansigt_t2 bnss_daempaff_udtryk_t2 bnss_daempaff_gester_t2 bnss_alogia_tale_t2 bnss_alogia_uddybning_t2 ),missing

cd c:\temp

set seed 05091118

keep tale_1_13_t0 tale_1_17_t0 cdss_totalscore_t0 gse_totalscore_t0 bf_samvittigscore_t0 bf_neuroscore_t0 who5_total_t0 ///

bnss_total_t2 Automatic_t0 trial number tale_1_4_t0 tale_1_8_t0 bnss_total_t1 bnss_total_t0 gpts_b_delscore_t0 demo_koen_t0 demo_studysite_t0 RANDBLIND sbq_avoid_t0

mi set flong

mi register imputed tale_1_13_t0 tale_1_17_t0 cdss_totalscore_t0 gse_totalscore_t0 bf_samvittigscore_t0 bf_neuroscore_t0 who5_total_t0 ///

Automatic_t0 tale_1_4_t0 tale_1_8_t0 bnss_total_t1 bnss_total_t2 bnss_total_t0

mi impute mvn tale_1_13_t0 tale_1_17_t0 cdss_totalscore_t0 gse_totalscore_t0 bf_samvittigscore_t0 bf_neuroscore_t0 who5_total_t0 ///

Automatic_t0 tale_1_4_t0 tale_1_8_t0 bnss_total_t0 bnss_total_t1 bnss_total_t2 = gpts_b_delscore_t0 sbq_avoid_t0 demo_koen_t0 demo_studysite_t0, prior(jeffreys) add(100) by(RANDBLIND)

gen strat_gpts= gpts_b_delscore_t0>=45

gen RANDY=RANDBLIND=="Y"

log using "L:\LovbeskyttetMapper\Face your Fears\Carsten\bnss_total_t1",text replace

//WITHOUT ADJUSTMENT FOR BASELINE IMBALANCES

mi estimate, dots: regress bnss_total_t1 i.RANDY i.strat_gpts bnss_total_t0 i.demo_koen_t0 i.demo_studysite_t0

mimrgns i.RANDY

//WITH ADJUSTMENT FOR BASELINE IMBALANCES

mi estimate, dots: regress bnss_total_t1 i.RANDY i.strat_gpts bnss_total_t0 i.demo_koen_t0 i.demo_studysite_t0 Automatic_t0 tale_1_4_t0 tale_1_8_t0

mimrgns i.RANDY

log close

log using "L:\LovbeskyttetMapper\Face your Fears\Carsten\bnss_total_t1",text append

//WITHOUT ADJUSTMENT FOR BASELINE IMBALANCES

mi estimate, dots: regress bnss_total_t2 i.RANDY i.strat_gpts bnss_total_t0 i.demo_koen_t0 i.demo_studysite_t0

mimrgns i.RANDY

//WITH ADJUSTMENT FOR BASELINE IMBALANCES

mi estimate, dots: regress bnss_total_t2 i.RANDY i.strat_gpts bnss_total_t0 i.demo_koen_t0 i.demo_studysite_t0 Automatic_t0 tale_1_4_t0 tale_1_8_t0

mimrgns i.RANDY

log close

//Mixed model

mi reshape long bnss_total_t, i(trial number) j(time)

log using "L:\LovbeskyttetMapper\Face your Fears\Carsten\bnss_total_t1",text append

mi estimate,dots: mixed bnss_total_t i.RANDY##i.time i.strat_gpts i.demo_koen_t0 i.demo_studysite_t0 || trial number: , noconstant residuals(unstructured,t(time))

mi test 1.RANDY#2.time 1.RANDY#1.time

log close

//Next outcome: cdss_totalscore_t1

use "L:\LovbeskyttetMapper\Face your Fears\Carsten\Final uden randomisering\fyf_wide_for_analysis.dta" ,clear

cd c:\temp

set seed 09091202

keep tale_1_13_t0 tale_1_17_t0 cdss_totalscore_t0 gse_totalscore_t0 bf_samvittigscore_t0 bf_neuroscore_t0 who5_total_t0 ///

cdss_totalscore_t2 Automatic_t0 trial number tale_1_4_t0 tale_1_8_t0 cdss_totalscore_t1 cdss_totalscore_t0 gpts_b_delscore_t0 demo_koen_t0 demo_studysite_t0 RANDBLIND sbq_avoid_t0

mi set flong

mi register imputed tale_1_13_t0 tale_1_17_t0 cdss_totalscore_t0 gse_totalscore_t0 bf_samvittigscore_t0 bf_neuroscore_t0 who5_total_t0 ///

Automatic_t0 tale_1_4_t0 tale_1_8_t0 cdss_totalscore_t1 cdss_totalscore_t2 //cdss_totalscore_t0

mi impute mvn tale_1_13_t0 tale_1_17_t0 cdss_totalscore_t0 gse_totalscore_t0 bf_samvittigscore_t0 bf_neuroscore_t0 who5_total_t0 ///

Automatic_t0 tale_1_4_t0 tale_1_8_t0 /*cdss_totalscore_t0*/ cdss_totalscore_t1 cdss_totalscore_t2 = gpts_b_delscore_t0 sbq_avoid_t0 demo_koen_t0 demo_studysite_t0, prior(jeffreys) add(100) by(RANDBLIND)

gen strat_gpts= gpts_b_delscore_t0>=45

gen RANDY=RANDBLIND=="Y"

log using "L:\LovbeskyttetMapper\Face your Fears\Carsten\cdss_totalscore_t1",text replace

//WITHOUT ADJUSTMENT FOR BASELINE IMBALANCES

mi estimate, dots: regress cdss_totalscore_t1 i.RANDY i.strat_gpts cdss_totalscore_t0 i.demo_koen_t0 i.demo_studysite_t0

mimrgns i.RANDY

//WITH ADJUSTMENT FOR BASELINE IMBALANCES

mi estimate, dots: regress cdss_totalscore_t1 i.RANDY i.strat_gpts cdss_totalscore_t0 i.demo_koen_t0 i.demo_studysite_t0 Automatic_t0 tale_1_4_t0 tale_1_8_t0

mimrgns i.RANDY

log close

log using "L:\LovbeskyttetMapper\Face your Fears\Carsten\cdss_totalscore_t1",text append

//WITHOUT ADJUSTMENT FOR BASELINE IMBALANCES

mi estimate, dots: regress cdss_totalscore_t2 i.RANDY i.strat_gpts cdss_totalscore_t0 i.demo_koen_t0 i.demo_studysite_t0

mimrgns i.RANDY

//WITH ADJUSTMENT FOR BASELINE IMBALANCES

mi estimate, dots: regress cdss_totalscore_t2 i.RANDY i.strat_gpts cdss_totalscore_t0 i.demo_koen_t0 i.demo_studysite_t0 Automatic_t0 tale_1_4_t0 tale_1_8_t0

mimrgns i.RANDY

log close

//Mixed model

mi reshape long cdss_totalscore_t, i(trial number) j(time)

log using "L:\LovbeskyttetMapper\Face your Fears\Carsten\cdss_totalscore_t1",text append

mi estimate,dots: mixed cdss_totalscore_t i.RANDY##i.time i.strat_gpts i.demo_koen_t0 i.demo_studysite_t0 || trial number: , noconstant residuals(unstructured,t(time))

mi test 1.RANDY#2.time 1.RANDY#1.time

log close

//Next outcome: cogdis

use "L:\LovbeskyttetMapper\Face your Fears\Carsten\Final uden randomisering\fyf_wide_for_analysis.dta" ,clear

recode cogdis*hyp* (8=1) (7=0) (9=0)

drop cogdis_t0

egen fc_0=rownonmiss(cogdis*hyp*t0)

egen fc_1=rownonmiss(cogdis*hyp*t1)

egen fc_2=rownonmiss(cogdis*hyp*t2)

egen cogdis_t0=rowtotal(cogdis*hyp*t0) if fc_0==9

egen cogdis_t1=rowtotal(cogdis*hyp*t1) if fc_1==9

egen cogdis_t2=rowtotal(cogdis*hyp*t2) if fc_2==9

cd c:\temp

set seed 09091212

keep tale_1_13_t0 tale_1_17_t0 cdss_totalscore_t0 gse_totalscore_t0 bf_samvittigscore_t0 bf_neuroscore_t0 who5_total_t0 ///

cogdis_t2 Automatic_t0 trial number tale_1_4_t0 tale_1_8_t0 cogdis_t1 cogdis_t0 gpts_b_delscore_t0 demo_koen_t0 demo_studysite_t0 RANDBLIND sbq_avoid_t0

mi set flong

mi register imputed tale_1_13_t0 tale_1_17_t0 cdss_totalscore_t0 gse_totalscore_t0 bf_samvittigscore_t0 bf_neuroscore_t0 who5_total_t0 ///

Automatic_t0 tale_1_4_t0 tale_1_8_t0 cogdis_t1 cogdis_t2 cogdis_t0

mi impute mvn tale_1_13_t0 tale_1_17_t0 cdss_totalscore_t0 gse_totalscore_t0 bf_samvittigscore_t0 bf_neuroscore_t0 who5_total_t0 ///

Automatic_t0 tale_1_4_t0 tale_1_8_t0 cogdis_t1 cogdis_t2 cogdis_t0 = gpts_b_delscore_t0 sbq_avoid_t0 demo_koen_t0 demo_studysite_t0, prior(jeffreys) add(100) by(RANDBLIND)

gen strat_gpts= gpts_b_delscore_t0>=45

gen RANDY=RANDBLIND=="Y"

log using "L:\LovbeskyttetMapper\Face your Fears\Carsten\cogdis_t1",text replace

//WITHOUT ADJUSTMENT FOR BASELINE IMBALANCES

mi estimate, dots: regress cogdis_t1 i.RANDY i.strat_gpts cogdis_t0 i.demo_koen_t0 i.demo_studysite_t0

mimrgns i.RANDY

//WITH ADJUSTMENT FOR BASELINE IMBALANCES

mi estimate, dots: regress cogdis_t1 i.RANDY i.strat_gpts cogdis_t0 i.demo_koen_t0 i.demo_studysite_t0 Automatic_t0 tale_1_4_t0 tale_1_8_t0

mimrgns i.RANDY

log close

log using "L:\LovbeskyttetMapper\Face your Fears\Carsten\cogdis_t1",text append

//WITHOUT ADJUSTMENT FOR BASELINE IMBALANCES

mi estimate, dots: regress cogdis_t2 i.RANDY i.strat_gpts cogdis_t0 i.demo_koen_t0 i.demo_studysite_t0

mimrgns i.RANDY

//WITH ADJUSTMENT FOR BASELINE IMBALANCES

mi estimate, dots: regress cogdis_t2 i.RANDY i.strat_gpts cogdis_t0 i.demo_koen_t0 i.demo_studysite_t0 Automatic_t0 tale_1_4_t0 tale_1_8_t0

mimrgns i.RANDY

log close

//Mixed model

mi reshape long cogdis_t, i(trial number) j(time)

log using "L:\LovbeskyttetMapper\Face your Fears\Carsten\cogdis_t1",text append

mi estimate,dots: mixed cogdis_t i.RANDY##i.time i.strat_gpts i.demo_koen_t0 i.demo_studysite_t0 || trial number: , noconstant residuals(unstructured,t(time))

mi test 1.RANDY#2.time 1.RANDY#1.time

log close

//Next outcome: trust_average_all_faces

use "L:\LovbeskyttetMapper\Face your Fears\Carsten\Final uden randomisering\fyf_wide_for_analysis.dta" ,clear

cd c:\temp

set seed 09091243

keep tale_1_13_t0 tale_1_17_t0 cdss_totalscore_t0 gse_totalscore_t0 bf_samvittigscore_t0 bf_neuroscore_t0 who5_total_t0 ///

trust_average_all_faces_t2 Automatic_t0 trial number tale_1_4_t0 tale_1_8_t0 trust_average_all_faces_t1 trust_average_all_faces_t0 gpts_b_delscore_t0 demo_koen_t0 demo_studysite_t0 RANDBLIND sbq_avoid_t0

mi set flong

mi register imputed tale_1_13_t0 tale_1_17_t0 cdss_totalscore_t0 gse_totalscore_t0 bf_samvittigscore_t0 bf_neuroscore_t0 who5_total_t0 ///

Automatic_t0 tale_1_4_t0 tale_1_8_t0 trust_average_all_faces_t1 trust_average_all_faces_t2 trust_average_all_faces_t0

mi impute mvn tale_1_13_t0 tale_1_17_t0 cdss_totalscore_t0 gse_totalscore_t0 bf_samvittigscore_t0 bf_neuroscore_t0 who5_total_t0 ///

Automatic_t0 tale_1_4_t0 tale_1_8_t0 trust_average_all_faces_t1 trust_average_all_faces_t2 trust_average_all_faces_t0 = gpts_b_delscore_t0 sbq_avoid_t0 demo_koen_t0 demo_studysite_t0, prior(jeffreys) add(100) by(RANDBLIND)

gen strat_gpts= gpts_b_delscore_t0>=45

gen RANDY=RANDBLIND=="Y"

log using "L:\LovbeskyttetMapper\Face your Fears\Carsten\trust_average_all_faces_t1",text replace

//WITHOUT ADJUSTMENT FOR BASELINE IMBALANCES

mi estimate, dots: regress trust_average_all_faces_t1 i.RANDY i.strat_gpts trust_average_all_faces_t0 i.demo_koen_t0 i.demo_studysite_t0

mimrgns i.RANDY

//WITH ADJUSTMENT FOR BASELINE IMBALANCES

mi estimate, dots: regress trust_average_all_faces_t1 i.RANDY i.strat_gpts trust_average_all_faces_t0 i.demo_koen_t0 i.demo_studysite_t0 Automatic_t0 tale_1_4_t0 tale_1_8_t0

mimrgns i.RANDY

log close

log using "L:\LovbeskyttetMapper\Face your Fears\Carsten\trust_average_all_faces_t1",text append

//WITHOUT ADJUSTMENT FOR BASELINE IMBALANCES

mi estimate, dots: regress trust_average_all_faces_t2 i.RANDY i.strat_gpts trust_average_all_faces_t0 i.demo_koen_t0 i.demo_studysite_t0

mimrgns i.RANDY

//WITH ADJUSTMENT FOR BASELINE IMBALANCES

mi estimate, dots: regress trust_average_all_faces_t2 i.RANDY i.strat_gpts trust_average_all_faces_t0 i.demo_koen_t0 i.demo_studysite_t0 Automatic_t0 tale_1_4_t0 tale_1_8_t0

mimrgns i.RANDY

log close

//Mixed model

mi reshape long trust_average_all_faces_t, i(trial number) j(time)

log using "L:\LovbeskyttetMapper\Face your Fears\Carsten\trust_average_all_faces_t1",text append

mi estimate,dots: mixed trust_average_all_faces_t i.RANDY##i.time i.strat_gpts i.demo_koen_t0 i.demo_studysite_t0 || trial number: , noconstant residuals(unstructured,t(time))

mi test 1.RANDY#2.time 1.RANDY#1.time

log close

//Next outcome: sspa_scopetotal

use "L:\LovbeskyttetMapper\Face your Fears\Carsten\Final uden randomisering\fyf_wide_for_analysis.dta" ,clear

egen sspa_scopetotal_t1=rowmean(sspa_nabo_int_t1-sspa_nabo_fok_t1 sspa_nabo_over_t1 sspa_nabo_soc_t1 sspa_udlejer_int_t1-sspa_udlejer_fok_t1 sspa_udlejer_forh_t1-sspa_udlejer_forh_t1)

egen sspa_scopetotal_t2=rowmean(sspa_nabo_int_t2-sspa_nabo_fok_t2 sspa_nabo_over_t2 sspa_nabo_soc_t2 sspa_udlejer_int_t2-sspa_udlejer_fok_t2 sspa_udlejer_forh_t2-sspa_udlejer_forh_t2)

cd c:\temp

set seed 09091251

keep tale_1_13_t0 tale_1_17_t0 cdss_totalscore_t0 gse_totalscore_t0 bf_samvittigscore_t0 bf_neuroscore_t0 who5_total_t0 ///

sspa_scopetotal_t2 Automatic_t0 trial number tale_1_4_t0 tale_1_8_t0 sspa_scopetotal_t1 sspa_scopetotal_t0 gpts_b_delscore_t0 demo_koen_t0 demo_studysite_t0 RANDBLIND sbq_avoid_t0

mi set flong

mi register imputed tale_1_13_t0 tale_1_17_t0 cdss_totalscore_t0 gse_totalscore_t0 bf_samvittigscore_t0 bf_neuroscore_t0 who5_total_t0 ///

Automatic_t0 tale_1_4_t0 tale_1_8_t0 sspa_scopetotal_t1 sspa_scopetotal_t2 sspa_scopetotal_t0

mi impute mvn tale_1_13_t0 tale_1_17_t0 cdss_totalscore_t0 gse_totalscore_t0 bf_samvittigscore_t0 bf_neuroscore_t0 who5_total_t0 ///

Automatic_t0 tale_1_4_t0 tale_1_8_t0 sspa_scopetotal_t1 sspa_scopetotal_t2 sspa_scopetotal_t0 = gpts_b_delscore_t0 sbq_avoid_t0 demo_koen_t0 demo_studysite_t0, prior(jeffreys) add(100) by(RANDBLIND)

gen strat_gpts= gpts_b_delscore_t0>=45

gen RANDY=RANDBLIND=="Y"

log using "L:\LovbeskyttetMapper\Face your Fears\Carsten\sspa_scopetotal_t1",text replace

//WITHOUT ADJUSTMENT FOR BASELINE IMBALANCES

mi estimate, dots: regress sspa_scopetotal_t1 i.RANDY i.strat_gpts sspa_scopetotal_t0 i.demo_koen_t0 i.demo_studysite_t0

mimrgns i.RANDY

//WITH ADJUSTMENT FOR BASELINE IMBALANCES

mi estimate, dots: regress sspa_scopetotal_t1 i.RANDY i.strat_gpts sspa_scopetotal_t0 i.demo_koen_t0 i.demo_studysite_t0 Automatic_t0 tale_1_4_t0 tale_1_8_t0

mimrgns i.RANDY

log close

log using "L:\LovbeskyttetMapper\Face your Fears\Carsten\sspa_scopetotal_t1",text append

//WITHOUT ADJUSTMENT FOR BASELINE IMBALANCES

mi estimate, dots: regress sspa_scopetotal_t2 i.RANDY i.strat_gpts sspa_scopetotal_t0 i.demo_koen_t0 i.demo_studysite_t0

mimrgns i.RANDY

//WITH ADJUSTMENT FOR BASELINE IMBALANCES

mi estimate, dots: regress sspa_scopetotal_t2 i.RANDY i.strat_gpts sspa_scopetotal_t0 i.demo_koen_t0 i.demo_studysite_t0 Automatic_t0 tale_1_4_t0 tale_1_8_t0

mimrgns i.RANDY

log close

//Mixed model

mi reshape long sspa_scopetotal_t, i(trial number) j(time)

log using "L:\LovbeskyttetMapper\Face your Fears\Carsten\sspa_scopetotal_t1",text append

mi estimate,dots: mixed sspa_scopetotal_t i.RANDY##i.time i.strat_gpts i.demo_koen_t0 i.demo_studysite_t0 || trial number: , noconstant residuals(unstructured,t(time))

mi test 1.RANDY#2.time 1.RANDY#1.time

log close

//Next outcome: f_andel

capture noisily frame create ibt3

capture noisily frame create ibt9

frame change ibt3

use "l:\LovbeskyttetMapper\Face your Fears\Materiale til Resultat artikel\IBT_SPSS\3 mdr total.dta",clear

frame change ibt9

use "l:\LovbeskyttetMapper\Face your Fears\Materiale til Resultat artikel\IBT_SPSS\9 mdr. total.dta",clear

frame change default

use "L:\LovbeskyttetMapper\Face your Fears\Carsten\Final uden randomisering\fyf_wide_for_analysis.dta" ,clear

frlink 1:1 trial number, frame(ibt3 Loebenummer)

frlink 1:1 trial number, frame(ibt9 Loebenummer)

frget f_andel Control Automatic,from(ibt3) suffix(_t1)

frget f_andel Control Automatic,from(ibt9) suffix(_t2)

cd c:\temp

set seed 11091221

keep tale_1_13_t0 tale_1_17_t0 cdss_totalscore_t0 gse_totalscore_t0 bf_samvittigscore_t0 bf_neuroscore_t0 who5_total_t0 ///

f_andel_t2 Automatic_t0 trial number tale_1_4_t0 tale_1_8_t0 f_andel_t1 f_andel_t0 gpts_b_delscore_t0 demo_koen_t0 demo_studysite_t0 RANDBLIND sbq_avoid_t0

mi set flong

mi register imputed tale_1_13_t0 tale_1_17_t0 cdss_totalscore_t0 gse_totalscore_t0 bf_samvittigscore_t0 bf_neuroscore_t0 who5_total_t0 ///

Automatic_t0 tale_1_4_t0 tale_1_8_t0 f_andel_t1 f_andel_t2 f_andel_t0

mi impute mvn tale_1_13_t0 tale_1_17_t0 cdss_totalscore_t0 gse_totalscore_t0 bf_samvittigscore_t0 bf_neuroscore_t0 who5_total_t0 ///

Automatic_t0 tale_1_4_t0 tale_1_8_t0 f_andel_t1 f_andel_t2 f_andel_t0 = gpts_b_delscore_t0 sbq_avoid_t0 demo_koen_t0 demo_studysite_t0, prior(jeffreys) add(100) by(RANDBLIND)

gen strat_gpts= gpts_b_delscore_t0>=45

gen RANDY=RANDBLIND=="Y"

log using "L:\LovbeskyttetMapper\Face your Fears\Carsten\f_andel_t1",text replace

//WITHOUT ADJUSTMENT FOR BASELINE IMBALANCES

mi estimate, dots: regress f_andel_t1 i.RANDY i.strat_gpts f_andel_t0 i.demo_koen_t0 i.demo_studysite_t0

mimrgns i.RANDY

//WITH ADJUSTMENT FOR BASELINE IMBALANCES

mi estimate, dots: regress f_andel_t1 i.RANDY i.strat_gpts f_andel_t0 i.demo_koen_t0 i.demo_studysite_t0 Automatic_t0 tale_1_4_t0 tale_1_8_t0

mimrgns i.RANDY

log close

log using "L:\LovbeskyttetMapper\Face your Fears\Carsten\f_andel_t1",text append

//WITHOUT ADJUSTMENT FOR BASELINE IMBALANCES

mi estimate, dots: regress f_andel_t2 i.RANDY i.strat_gpts f_andel_t0 i.demo_koen_t0 i.demo_studysite_t0

mimrgns i.RANDY

//WITH ADJUSTMENT FOR BASELINE IMBALANCES

mi estimate, dots: regress f_andel_t2 i.RANDY i.strat_gpts f_andel_t0 i.demo_koen_t0 i.demo_studysite_t0 Automatic_t0 tale_1_4_t0 tale_1_8_t0

mimrgns i.RANDY

log close

//Mixed model

mi reshape long f_andel_t, i(trial number) j(time)

log using "L:\LovbeskyttetMapper\Face your Fears\Carsten\f_andel_t1",text append

mi estimate,dots: mixed f_andel_t i.RANDY##i.time i.strat_gpts i.demo_koen_t0 i.demo_studysite_t0 || trial number: , noconstant residuals(unstructured,t(time))

mi test 1.RANDY#2.time 1.RANDY#1.time

log close

//Next outcome: Automatic

capture noisily frame create ibt3

capture noisily frame create ibt9

frame change ibt3

use "l:\LovbeskyttetMapper\Face your Fears\Materiale til Resultat artikel\IBT_SPSS\3 mdr total.dta",clear

frame change ibt9

use "l:\LovbeskyttetMapper\Face your Fears\Materiale til Resultat artikel\IBT_SPSS\9 mdr. total.dta",clear

frame change default

use "L:\LovbeskyttetMapper\Face your Fears\Carsten\Final uden randomisering\fyf_wide_for_analysis.dta" ,clear

frlink 1:1 trial number, frame(ibt3 Loebenummer)

frlink 1:1 trial number, frame(ibt9 Loebenummer)

frget Automatic Control Automatic,from(ibt3) suffix(_t1)

frget Automatic Control Automatic,from(ibt9) suffix(_t2)

cd c:\temp

set seed 11091225

keep tale_1_13_t0 tale_1_17_t0 cdss_totalscore_t0 gse_totalscore_t0 bf_samvittigscore_t0 bf_neuroscore_t0 who5_total_t0 ///

Automatic_t2 Automatic_t0 trial number tale_1_4_t0 tale_1_8_t0 Automatic_t1 Automatic_t0 gpts_b_delscore_t0 demo_koen_t0 demo_studysite_t0 RANDBLIND sbq_avoid_t0

mi set flong

mi register imputed tale_1_13_t0 tale_1_17_t0 cdss_totalscore_t0 gse_totalscore_t0 bf_samvittigscore_t0 bf_neuroscore_t0 who5_total_t0 ///

tale_1_4_t0 tale_1_8_t0 Automatic_t1 Automatic_t2 Automatic_t0

mi impute mvn tale_1_13_t0 tale_1_17_t0 cdss_totalscore_t0 gse_totalscore_t0 bf_samvittigscore_t0 bf_neuroscore_t0 who5_total_t0 ///

tale_1_4_t0 tale_1_8_t0 Automatic_t1 Automatic_t2 Automatic_t0 = gpts_b_delscore_t0 sbq_avoid_t0 demo_koen_t0 demo_studysite_t0, prior(jeffreys) add(100) by(RANDBLIND)

gen strat_gpts= gpts_b_delscore_t0>=45

gen RANDY=RANDBLIND=="Y"

log using "L:\LovbeskyttetMapper\Face your Fears\Carsten\Automatic_t1",text replace

//WITHOUT ADJUSTMENT FOR BASELINE IMBALANCES

mi estimate, dots: regress Automatic_t1 i.RANDY i.strat_gpts Automatic_t0 i.demo_koen_t0 i.demo_studysite_t0

mimrgns i.RANDY

//WITH ADJUSTMENT FOR BASELINE IMBALANCES

mi estimate, dots: regress Automatic_t1 i.RANDY i.strat_gpts Automatic_t0 i.demo_koen_t0 i.demo_studysite_t0 Automatic_t0 tale_1_4_t0 tale_1_8_t0

mimrgns i.RANDY

log close

log using "L:\LovbeskyttetMapper\Face your Fears\Carsten\Automatic_t1",text append

//WITHOUT ADJUSTMENT FOR BASELINE IMBALANCES

mi estimate, dots: regress Automatic_t2 i.RANDY i.strat_gpts Automatic_t0 i.demo_koen_t0 i.demo_studysite_t0

mimrgns i.RANDY

//WITH ADJUSTMENT FOR BASELINE IMBALANCES

mi estimate, dots: regress Automatic_t2 i.RANDY i.strat_gpts Automatic_t0 i.demo_koen_t0 i.demo_studysite_t0 Automatic_t0 tale_1_4_t0 tale_1_8_t0

mimrgns i.RANDY

log close

//Mixed model

mi reshape long Automatic_t, i(trial number) j(time)

log using "L:\LovbeskyttetMapper\Face your Fears\Carsten\Automatic_t1",text append

mi estimate,dots: mixed Automatic_t i.RANDY##i.time i.strat_gpts i.demo_koen_t0 i.demo_studysite_t0 || trial number: , noconstant residuals(unstructured,t(time))

mi test 1.RANDY#2.time 1.RANDY#1.time

log close

//Next outcome: Control

capture noisily frame create ibt3

capture noisily frame create ibt9

frame change ibt3

use "l:\LovbeskyttetMapper\Face your Fears\Materiale til Resultat artikel\IBT_SPSS\3 mdr total.dta",clear

frame change ibt9

use "l:\LovbeskyttetMapper\Face your Fears\Materiale til Resultat artikel\IBT_SPSS\9 mdr. total.dta",clear

frame change default

use "L:\LovbeskyttetMapper\Face your Fears\Carsten\Final uden randomisering\fyf_wide_for_analysis.dta" ,clear

frlink 1:1 trial number, frame(ibt3 Loebenummer)

frlink 1:1 trial number, frame(ibt9 Loebenummer)

frget Control Control Automatic,from(ibt3) suffix(_t1)

frget Control Control Automatic,from(ibt9) suffix(_t2)

cd c:\temp

set seed 11091228

keep tale_1_13_t0 tale_1_17_t0 cdss_totalscore_t0 gse_totalscore_t0 bf_samvittigscore_t0 bf_neuroscore_t0 who5_total_t0 ///

Control_t2 Automatic_t0 trial number tale_1_4_t0 tale_1_8_t0 Control_t1 Control_t0 gpts_b_delscore_t0 demo_koen_t0 demo_studysite_t0 RANDBLIND sbq_avoid_t0

mi set flong

mi register imputed tale_1_13_t0 tale_1_17_t0 cdss_totalscore_t0 gse_totalscore_t0 bf_samvittigscore_t0 bf_neuroscore_t0 who5_total_t0 ///

Automatic_t0 tale_1_4_t0 tale_1_8_t0 Control_t1 Control_t2 Control_t0

mi impute mvn tale_1_13_t0 tale_1_17_t0 cdss_totalscore_t0 gse_totalscore_t0 bf_samvittigscore_t0 bf_neuroscore_t0 who5_total_t0 ///

Automatic_t0 tale_1_4_t0 tale_1_8_t0 Control_t1 Control_t2 Control_t0 = gpts_b_delscore_t0 sbq_avoid_t0 demo_koen_t0 demo_studysite_t0, prior(jeffreys) add(100) by(RANDBLIND)

gen strat_gpts= gpts_b_delscore_t0>=45

gen RANDY=RANDBLIND=="Y"

log using "L:\LovbeskyttetMapper\Face your Fears\Carsten\Control_t1",text replace

//WITHOUT ADJUSTMENT FOR BASELINE IMBALANCES

mi estimate, dots: regress Control_t1 i.RANDY i.strat_gpts Control_t0 i.demo_koen_t0 i.demo_studysite_t0

mimrgns i.RANDY

//WITH ADJUSTMENT FOR BASELINE IMBALANCES

mi estimate, dots: regress Control_t1 i.RANDY i.strat_gpts Control_t0 i.demo_koen_t0 i.demo_studysite_t0 Automatic_t0 tale_1_4_t0 tale_1_8_t0

mimrgns i.RANDY

log close

log using "L:\LovbeskyttetMapper\Face your Fears\Carsten\Control_t1",text append

//WITHOUT ADJUSTMENT FOR BASELINE IMBALANCES

mi estimate, dots: regress Control_t2 i.RANDY i.strat_gpts Control_t0 i.demo_koen_t0 i.demo_studysite_t0

mimrgns i.RANDY

//WITH ADJUSTMENT FOR BASELINE IMBALANCES

mi estimate, dots: regress Control_t2 i.RANDY i.strat_gpts Control_t0 i.demo_koen_t0 i.demo_studysite_t0 Automatic_t0 tale_1_4_t0 tale_1_8_t0

mimrgns i.RANDY

log close

//Mixed model

mi reshape long Control_t, i(trial number) j(time)

log using "L:\LovbeskyttetMapper\Face your Fears\Carsten\Control_t1",text append

mi estimate,dots: mixed Control_t i.RANDY##i.time i.strat_gpts i.demo_koen_t0 i.demo_studysite_t0 || trial number: , noconstant residuals(unstructured,t(time))

mi test 1.RANDY#2.time 1.RANDY#1.time

log close

//Next outcome: sidas_samletscore

frame change default

use "L:\LovbeskyttetMapper\Face your Fears\Carsten\Final uden randomisering\fyf_wide_for_analysis.dta" ,clear

cd c:\temp

set seed 11091232

keep tale_1_13_t0 tale_1_17_t0 cdss_totalscore_t0 gse_totalscore_t0 bf_samvittigscore_t0 bf_neuroscore_t0 who5_total_t0 ///

sidas_samletscore_t2 Automatic_t0 trial number tale_1_4_t0 tale_1_8_t0 sidas_samletscore_t1 sidas_samletscore_t0 gpts_b_delscore_t0 demo_koen_t0 demo_studysite_t0 RANDBLIND sbq_avoid_t0

mi set flong

mi register imputed tale_1_13_t0 tale_1_17_t0 cdss_totalscore_t0 gse_totalscore_t0 bf_samvittigscore_t0 bf_neuroscore_t0 who5_total_t0 ///

Automatic_t0 tale_1_4_t0 tale_1_8_t0 sidas_samletscore_t1 sidas_samletscore_t2 sidas_samletscore_t0

mi impute mvn tale_1_13_t0 tale_1_17_t0 cdss_totalscore_t0 gse_totalscore_t0 bf_samvittigscore_t0 bf_neuroscore_t0 who5_total_t0 ///

Automatic_t0 tale_1_4_t0 tale_1_8_t0 sidas_samletscore_t1 sidas_samletscore_t2 sidas_samletscore_t0 = gpts_b_delscore_t0 sbq_avoid_t0 demo_koen_t0 demo_studysite_t0, prior(jeffreys) add(100) by(RANDBLIND)

gen strat_gpts= gpts_b_delscore_t0>=45

gen RANDY=RANDBLIND=="Y"

log using "L:\LovbeskyttetMapper\Face your Fears\Carsten\sidas_samletscore_t1",text replace

//WITHOUT ADJUSTMENT FOR BASELINE IMBALANCES

mi estimate, dots: regress sidas_samletscore_t1 i.RANDY i.strat_gpts sidas_samletscore_t0 i.demo_koen_t0 i.demo_studysite_t0

mimrgns i.RANDY

//WITH ADJUSTMENT FOR BASELINE IMBALANCES

mi estimate, dots: regress sidas_samletscore_t1 i.RANDY i.strat_gpts sidas_samletscore_t0 i.demo_koen_t0 i.demo_studysite_t0 Automatic_t0 tale_1_4_t0 tale_1_8_t0

mimrgns i.RANDY

log close

log using "L:\LovbeskyttetMapper\Face your Fears\Carsten\sidas_samletscore_t1",text append

//WITHOUT ADJUSTMENT FOR BASELINE IMBALANCES

mi estimate, dots: regress sidas_samletscore_t2 i.RANDY i.strat_gpts sidas_samletscore_t0 i.demo_koen_t0 i.demo_studysite_t0

mimrgns i.RANDY

//WITH ADJUSTMENT FOR BASELINE IMBALANCES

mi estimate, dots: regress sidas_samletscore_t2 i.RANDY i.strat_gpts sidas_samletscore_t0 i.demo_koen_t0 i.demo_studysite_t0 Automatic_t0 tale_1_4_t0 tale_1_8_t0

mimrgns i.RANDY

log close

//Mixed model

mi reshape long sidas_samletscore_t, i(trial number) j(time)

log using "L:\LovbeskyttetMapper\Face your Fears\Carsten\sidas_samletscore_t1",text append

mi estimate,dots: mixed sidas_samletscore_t i.RANDY##i.time i.strat_gpts i.demo_koen_t0 i.demo_studysite_t0 || trial number: , noconstant residuals(unstructured,t(time))

mi test 1.RANDY#2.time 1.RANDY#1.time

log close

//Next outcome: bcss_delscore_migneg

frame change default

use "L:\LovbeskyttetMapper\Face your Fears\Carsten\Final uden randomisering\fyf_wide_for_analysis.dta" ,clear

cd c:\temp

set seed 11091240

keep tale_1_13_t0 tale_1_17_t0 cdss_totalscore_t0 gse_totalscore_t0 bf_samvittigscore_t0 bf_neuroscore_t0 who5_total_t0 ///

bcss_delscore_migneg_t2 Automatic_t0 trial number tale_1_4_t0 tale_1_8_t0 bcss_delscore_migneg_t1 bcss_delscore_migneg_t0 gpts_b_delscore_t0 demo_koen_t0 demo_studysite_t0 RANDBLIND sbq_avoid_t0

mi set flong

mi register imputed tale_1_13_t0 tale_1_17_t0 cdss_totalscore_t0 gse_totalscore_t0 bf_samvittigscore_t0 bf_neuroscore_t0 who5_total_t0 ///

Automatic_t0 tale_1_4_t0 tale_1_8_t0 bcss_delscore_migneg_t1 bcss_delscore_migneg_t2 bcss_delscore_migneg_t0

mi impute mvn tale_1_13_t0 tale_1_17_t0 cdss_totalscore_t0 gse_totalscore_t0 bf_samvittigscore_t0 bf_neuroscore_t0 who5_total_t0 ///

Automatic_t0 tale_1_4_t0 tale_1_8_t0 bcss_delscore_migneg_t1 bcss_delscore_migneg_t2 bcss_delscore_migneg_t0 = gpts_b_delscore_t0 sbq_avoid_t0 demo_koen_t0 demo_studysite_t0, prior(jeffreys) add(100) by(RANDBLIND)

gen strat_gpts= gpts_b_delscore_t0>=45

gen RANDY=RANDBLIND=="Y"

log using "L:\LovbeskyttetMapper\Face your Fears\Carsten\bcss_delscore_migneg_t1",text replace

//WITHOUT ADJUSTMENT FOR BASELINE IMBALANCES

mi estimate, dots: regress bcss_delscore_migneg_t1 i.RANDY i.strat_gpts bcss_delscore_migneg_t0 i.demo_koen_t0 i.demo_studysite_t0

mimrgns i.RANDY

//WITH ADJUSTMENT FOR BASELINE IMBALANCES

mi estimate, dots: regress bcss_delscore_migneg_t1 i.RANDY i.strat_gpts bcss_delscore_migneg_t0 i.demo_koen_t0 i.demo_studysite_t0 Automatic_t0 tale_1_4_t0 tale_1_8_t0

mimrgns i.RANDY

log close

log using "L:\LovbeskyttetMapper\Face your Fears\Carsten\bcss_delscore_migneg_t1",text append

//WITHOUT ADJUSTMENT FOR BASELINE IMBALANCES

mi estimate, dots: regress bcss_delscore_migneg_t2 i.RANDY i.strat_gpts bcss_delscore_migneg_t0 i.demo_koen_t0 i.demo_studysite_t0

mimrgns i.RANDY

//WITH ADJUSTMENT FOR BASELINE IMBALANCES

mi estimate, dots: regress bcss_delscore_migneg_t2 i.RANDY i.strat_gpts bcss_delscore_migneg_t0 i.demo_koen_t0 i.demo_studysite_t0 Automatic_t0 tale_1_4_t0 tale_1_8_t0

mimrgns i.RANDY

log close

//Mixed model

mi reshape long bcss_delscore_migneg_t, i(trial number) j(time)

log using "L:\LovbeskyttetMapper\Face your Fears\Carsten\bcss_delscore_migneg_t1",text append

mi estimate,dots: mixed bcss_delscore_migneg_t i.RANDY##i.time i.strat_gpts i.demo_koen_t0 i.demo_studysite_t0 || trial number: , noconstant residuals(unstructured,t(time))

mi test 1.RANDY#2.time 1.RANDY#1.time

log close

//Next outcome: bcss_delscore_migpos

frame change default

use "L:\LovbeskyttetMapper\Face your Fears\Carsten\Final uden randomisering\fyf_wide_for_analysis.dta" ,clear

cd c:\temp

set seed 11091244

keep tale_1_13_t0 tale_1_17_t0 cdss_totalscore_t0 gse_totalscore_t0 bf_samvittigscore_t0 bf_neuroscore_t0 who5_total_t0 ///

bcss_delscore_migpos_t2 Automatic_t0 trial number tale_1_4_t0 tale_1_8_t0 bcss_delscore_migpos_t1 bcss_delscore_migpos_t0 gpts_b_delscore_t0 demo_koen_t0 demo_studysite_t0 RANDBLIND sbq_avoid_t0

mi set flong

mi register imputed tale_1_13_t0 tale_1_17_t0 cdss_totalscore_t0 gse_totalscore_t0 bf_samvittigscore_t0 bf_neuroscore_t0 who5_total_t0 ///

Automatic_t0 tale_1_4_t0 tale_1_8_t0 bcss_delscore_migpos_t1 bcss_delscore_migpos_t2 bcss_delscore_migpos_t0

mi impute mvn tale_1_13_t0 tale_1_17_t0 cdss_totalscore_t0 gse_totalscore_t0 bf_samvittigscore_t0 bf_neuroscore_t0 who5_total_t0 ///

Automatic_t0 tale_1_4_t0 tale_1_8_t0 bcss_delscore_migpos_t1 bcss_delscore_migpos_t2 bcss_delscore_migpos_t0 = gpts_b_delscore_t0 sbq_avoid_t0 demo_koen_t0 demo_studysite_t0, prior(jeffreys) add(100) by(RANDBLIND)

gen strat_gpts= gpts_b_delscore_t0>=45

gen RANDY=RANDBLIND=="Y"

log using "L:\LovbeskyttetMapper\Face your Fears\Carsten\bcss_delscore_migpos_t1",text replace

//WITHOUT ADJUSTMENT FOR BASELINE IMBALANCES

mi estimate, dots: regress bcss_delscore_migpos_t1 i.RANDY i.strat_gpts bcss_delscore_migpos_t0 i.demo_koen_t0 i.demo_studysite_t0

mimrgns i.RANDY

//WITH ADJUSTMENT FOR BASELINE IMBALANCES

mi estimate, dots: regress bcss_delscore_migpos_t1 i.RANDY i.strat_gpts bcss_delscore_migpos_t0 i.demo_koen_t0 i.demo_studysite_t0 Automatic_t0 tale_1_4_t0 tale_1_8_t0

mimrgns i.RANDY

log close

log using "L:\LovbeskyttetMapper\Face your Fears\Carsten\bcss_delscore_migpos_t1",text append

//WITHOUT ADJUSTMENT FOR BASELINE IMBALANCES

mi estimate, dots: regress bcss_delscore_migpos_t2 i.RANDY i.strat_gpts bcss_delscore_migpos_t0 i.demo_koen_t0 i.demo_studysite_t0

mimrgns i.RANDY

//WITH ADJUSTMENT FOR BASELINE IMBALANCES

mi estimate, dots: regress bcss_delscore_migpos_t2 i.RANDY i.strat_gpts bcss_delscore_migpos_t0 i.demo_koen_t0 i.demo_studysite_t0 Automatic_t0 tale_1_4_t0 tale_1_8_t0

mimrgns i.RANDY

log close

//Mixed model

mi reshape long bcss_delscore_migpos_t, i(trial number) j(time)

log using "L:\LovbeskyttetMapper\Face your Fears\Carsten\bcss_delscore_migpos_t1",text append

mi estimate,dots: mixed bcss_delscore_migpos_t i.RANDY##i.time i.strat_gpts i.demo_koen_t0 i.demo_studysite_t0 || trial number: , noconstant residuals(unstructured,t(time))

mi test 1.RANDY#2.time 1.RANDY#1.time

log close

//Next outcome: bcss_delscore_andremenneg

frame change default

use "L:\LovbeskyttetMapper\Face your Fears\Carsten\Final uden randomisering\fyf_wide_for_analysis.dta" ,clear

cd c:\temp

set seed 11091248

keep tale_1_13_t0 tale_1_17_t0 cdss_totalscore_t0 gse_totalscore_t0 bf_samvittigscore_t0 bf_neuroscore_t0 who5_total_t0 ///

bcss_delscore_andremenneg_t2 Automatic_t0 trial number tale_1_4_t0 tale_1_8_t0 bcss_delscore_andremenneg_t1 bcss_delscore_andremenneg_t0 gpts_b_delscore_t0 demo_koen_t0 demo_studysite_t0 RANDBLIND sbq_avoid_t0

mi set flong

mi register imputed tale_1_13_t0 tale_1_17_t0 cdss_totalscore_t0 gse_totalscore_t0 bf_samvittigscore_t0 bf_neuroscore_t0 who5_total_t0 ///

Automatic_t0 tale_1_4_t0 tale_1_8_t0 bcss_delscore_andremenneg_t1 bcss_delscore_andremenneg_t2 bcss_delscore_andremenneg_t0

mi impute mvn tale_1_13_t0 tale_1_17_t0 cdss_totalscore_t0 gse_totalscore_t0 bf_samvittigscore_t0 bf_neuroscore_t0 who5_total_t0 ///

Automatic_t0 tale_1_4_t0 tale_1_8_t0 bcss_delscore_andremenneg_t1 bcss_delscore_andremenneg_t2 bcss_delscore_andremenneg_t0 = gpts_b_delscore_t0 sbq_avoid_t0 demo_koen_t0 demo_studysite_t0, prior(jeffreys) add(100) by(RANDBLIND)

gen strat_gpts= gpts_b_delscore_t0>=45

gen RANDY=RANDBLIND=="Y"

log using "L:\LovbeskyttetMapper\Face your Fears\Carsten\bcss_delscore_andremenneg_t1",text replace

//WITHOUT ADJUSTMENT FOR BASELINE IMBALANCES

mi estimate, dots: regress bcss_delscore_andremenneg_t1 i.RANDY i.strat_gpts bcss_delscore_andremenneg_t0 i.demo_koen_t0 i.demo_studysite_t0

mimrgns i.RANDY

//WITH ADJUSTMENT FOR BASELINE IMBALANCES

mi estimate, dots: regress bcss_delscore_andremenneg_t1 i.RANDY i.strat_gpts bcss_delscore_andremenneg_t0 i.demo_koen_t0 i.demo_studysite_t0 Automatic_t0 tale_1_4_t0 tale_1_8_t0

mimrgns i.RANDY

log close

log using "L:\LovbeskyttetMapper\Face your Fears\Carsten\bcss_delscore_andremenneg_t1",text append

//WITHOUT ADJUSTMENT FOR BASELINE IMBALANCES

mi estimate, dots: regress bcss_delscore_andremenneg_t2 i.RANDY i.strat_gpts bcss_delscore_andremenneg_t0 i.demo_koen_t0 i.demo_studysite_t0

mimrgns i.RANDY

//WITH ADJUSTMENT FOR BASELINE IMBALANCES

mi estimate, dots: regress bcss_delscore_andremenneg_t2 i.RANDY i.strat_gpts bcss_delscore_andremenneg_t0 i.demo_koen_t0 i.demo_studysite_t0 Automatic_t0 tale_1_4_t0 tale_1_8_t0

mimrgns i.RANDY

log close

//Mixed model

mi reshape long bcss_delscore_andremenneg_t, i(trial number) j(time)

log using "L:\LovbeskyttetMapper\Face your Fears\Carsten\bcss_delscore_andremenneg_t1",text append

mi estimate,dots: mixed bcss_delscore_andremenneg_t i.RANDY##i.time i.strat_gpts i.demo_koen_t0 i.demo_studysite_t0 || trial number: , noconstant residuals(unstructured,t(time))

mi test 1.RANDY#2.time 1.RANDY#1.time

log close

//Next outcome: bcss_delscore_andremenpos

frame change default

use "L:\LovbeskyttetMapper\Face your Fears\Carsten\Final uden randomisering\fyf_wide_for_analysis.dta" ,clear

cd c:\temp

set seed 11091250

keep tale_1_13_t0 tale_1_17_t0 cdss_totalscore_t0 gse_totalscore_t0 bf_samvittigscore_t0 bf_neuroscore_t0 who5_total_t0 ///

bcss_delscore_andremenpos_t2 Automatic_t0 trial number tale_1_4_t0 tale_1_8_t0 bcss_delscore_andremenpos_t1 bcss_delscore_andremenpos_t0 gpts_b_delscore_t0 demo_koen_t0 demo_studysite_t0 RANDBLIND sbq_avoid_t0

mi set flong

mi register imputed tale_1_13_t0 tale_1_17_t0 cdss_totalscore_t0 gse_totalscore_t0 bf_samvittigscore_t0 bf_neuroscore_t0 who5_total_t0 ///

Automatic_t0 tale_1_4_t0 tale_1_8_t0 bcss_delscore_andremenpos_t1 bcss_delscore_andremenpos_t2 bcss_delscore_andremenpos_t0

mi impute mvn tale_1_13_t0 tale_1_17_t0 cdss_totalscore_t0 gse_totalscore_t0 bf_samvittigscore_t0 bf_neuroscore_t0 who5_total_t0 ///

Automatic_t0 tale_1_4_t0 tale_1_8_t0 bcss_delscore_andremenpos_t1 bcss_delscore_andremenpos_t2 bcss_delscore_andremenpos_t0 = gpts_b_delscore_t0 sbq_avoid_t0 demo_koen_t0 demo_studysite_t0, prior(jeffreys) add(100) by(RANDBLIND)

gen strat_gpts= gpts_b_delscore_t0>=45

gen RANDY=RANDBLIND=="Y"

log using "L:\LovbeskyttetMapper\Face your Fears\Carsten\bcss_delscore_andremenpos_t1",text replace

//WITHOUT ADJUSTMENT FOR BASELINE IMBALANCES

mi estimate, dots: regress bcss_delscore_andremenpos_t1 i.RANDY i.strat_gpts bcss_delscore_andremenpos_t0 i.demo_koen_t0 i.demo_studysite_t0

mimrgns i.RANDY

//WITH ADJUSTMENT FOR BASELINE IMBALANCES

mi estimate, dots: regress bcss_delscore_andremenpos_t1 i.RANDY i.strat_gpts bcss_delscore_andremenpos_t0 i.demo_koen_t0 i.demo_studysite_t0 Automatic_t0 tale_1_4_t0 tale_1_8_t0

mimrgns i.RANDY

log close

log using "L:\LovbeskyttetMapper\Face your Fears\Carsten\bcss_delscore_andremenpos_t1",text append

//WITHOUT ADJUSTMENT FOR BASELINE IMBALANCES

mi estimate, dots: regress bcss_delscore_andremenpos_t2 i.RANDY i.strat_gpts bcss_delscore_andremenpos_t0 i.demo_koen_t0 i.demo_studysite_t0

mimrgns i.RANDY

//WITH ADJUSTMENT FOR BASELINE IMBALANCES

mi estimate, dots: regress bcss_delscore_andremenpos_t2 i.RANDY i.strat_gpts bcss_delscore_andremenpos_t0 i.demo_koen_t0 i.demo_studysite_t0 Automatic_t0 tale_1_4_t0 tale_1_8_t0

mimrgns i.RANDY

log close

//Mixed model

mi reshape long bcss_delscore_andremenpos_t, i(trial number) j(time)

log using "L:\LovbeskyttetMapper\Face your Fears\Carsten\bcss_delscore_andremenpos_t1",text append

mi estimate,dots: mixed bcss_delscore_andremenpos_t i.RANDY##i.time i.strat_gpts i.demo_koen_t0 i.demo_studysite_t0 || trial number: , noconstant residuals(unstructured,t(time))

mi test 1.RANDY#2.time 1.RANDY#1.time

log close

//Next outcome: dacobs_jtc_delscore (Jumping to conclusion (DACOBS))

frame change default

use "L:\LovbeskyttetMapper\Face your Fears\Carsten\Final uden randomisering\fyf_wide_for_analysis.dta" ,clear

cd c:\temp

set seed 11091301

keep tale_1_13_t0 tale_1_17_t0 cdss_totalscore_t0 gse_totalscore_t0 bf_samvittigscore_t0 bf_neuroscore_t0 who5_total_t0 ///

dacobs_jtc_delscore_t2 Automatic_t0 trial number tale_1_4_t0 tale_1_8_t0 dacobs_jtc_delscore_t1 dacobs_jtc_delscore_t0 gpts_b_delscore_t0 demo_koen_t0 demo_studysite_t0 RANDBLIND sbq_avoid_t0

mi set flong

mi register imputed tale_1_13_t0 tale_1_17_t0 cdss_totalscore_t0 gse_totalscore_t0 bf_samvittigscore_t0 bf_neuroscore_t0 who5_total_t0 ///

Automatic_t0 tale_1_4_t0 tale_1_8_t0 dacobs_jtc_delscore_t1 dacobs_jtc_delscore_t2 dacobs_jtc_delscore_t0

mi impute mvn tale_1_13_t0 tale_1_17_t0 cdss_totalscore_t0 gse_totalscore_t0 bf_samvittigscore_t0 bf_neuroscore_t0 who5_total_t0 ///

Automatic_t0 tale_1_4_t0 tale_1_8_t0 dacobs_jtc_delscore_t1 dacobs_jtc_delscore_t2 dacobs_jtc_delscore_t0 = gpts_b_delscore_t0 sbq_avoid_t0 demo_koen_t0 demo_studysite_t0, prior(jeffreys) add(100) by(RANDBLIND)

gen strat_gpts= gpts_b_delscore_t0>=45

gen RANDY=RANDBLIND=="Y"

log using "L:\LovbeskyttetMapper\Face your Fears\Carsten\dacobs_jtc_delscore_t1",text replace

//WITHOUT ADJUSTMENT FOR BASELINE IMBALANCES

mi estimate, dots: regress dacobs_jtc_delscore_t1 i.RANDY i.strat_gpts dacobs_jtc_delscore_t0 i.demo_koen_t0 i.demo_studysite_t0

mimrgns i.RANDY

//WITH ADJUSTMENT FOR BASELINE IMBALANCES

mi estimate, dots: regress dacobs_jtc_delscore_t1 i.RANDY i.strat_gpts dacobs_jtc_delscore_t0 i.demo_koen_t0 i.demo_studysite_t0 Automatic_t0 tale_1_4_t0 tale_1_8_t0

mimrgns i.RANDY

log close

log using "L:\LovbeskyttetMapper\Face your Fears\Carsten\dacobs_jtc_delscore_t1",text append

//WITHOUT ADJUSTMENT FOR BASELINE IMBALANCES

mi estimate, dots: regress dacobs_jtc_delscore_t2 i.RANDY i.strat_gpts dacobs_jtc_delscore_t0 i.demo_koen_t0 i.demo_studysite_t0

mimrgns i.RANDY

//WITH ADJUSTMENT FOR BASELINE IMBALANCES

mi estimate, dots: regress dacobs_jtc_delscore_t2 i.RANDY i.strat_gpts dacobs_jtc_delscore_t0 i.demo_koen_t0 i.demo_studysite_t0 Automatic_t0 tale_1_4_t0 tale_1_8_t0

mimrgns i.RANDY

log close

//Mixed model

mi reshape long dacobs_jtc_delscore_t, i(trial number) j(time)

log using "L:\LovbeskyttetMapper\Face your Fears\Carsten\dacobs_jtc_delscore_t1",text append

mi estimate,dots: mixed dacobs_jtc_delscore_t i.RANDY##i.time i.strat_gpts i.demo_koen_t0 i.demo_studysite_t0 || trial number: , noconstant residuals(unstructured,t(time))

mi test 1.RANDY#2.time 1.RANDY#1.time

log close

//Next outcome: dacobs_inflex_delscore (Belief inflexibility (DACOBS))

frame change default

use "L:\LovbeskyttetMapper\Face your Fears\Carsten\Final uden randomisering\fyf_wide_for_analysis.dta" ,clear

cd c:\temp

set seed 1109130

keep tale_1_13_t0 tale_1_17_t0 cdss_totalscore_t0 gse_totalscore_t0 bf_samvittigscore_t0 bf_neuroscore_t0 who5_total_t0 ///

dacobs_inflex_delscore_t2 Automatic_t0 trial number tale_1_4_t0 tale_1_8_t0 dacobs_inflex_delscore_t1 dacobs_inflex_delscore_t0 gpts_b_delscore_t0 demo_koen_t0 demo_studysite_t0 RANDBLIND sbq_avoid_t0

mi set flong

mi register imputed tale_1_13_t0 tale_1_17_t0 cdss_totalscore_t0 gse_totalscore_t0 bf_samvittigscore_t0 bf_neuroscore_t0 who5_total_t0 ///

Automatic_t0 tale_1_4_t0 tale_1_8_t0 dacobs_inflex_delscore_t1 dacobs_inflex_delscore_t2 dacobs_inflex_delscore_t0

mi impute mvn tale_1_13_t0 tale_1_17_t0 cdss_totalscore_t0 gse_totalscore_t0 bf_samvittigscore_t0 bf_neuroscore_t0 who5_total_t0 ///

Automatic_t0 tale_1_4_t0 tale_1_8_t0 dacobs_inflex_delscore_t1 dacobs_inflex_delscore_t2 dacobs_inflex_delscore_t0 = gpts_b_delscore_t0 sbq_avoid_t0 demo_koen_t0 demo_studysite_t0, prior(jeffreys) add(100) by(RANDBLIND)

gen strat_gpts= gpts_b_delscore_t0>=45

gen RANDY=RANDBLIND=="Y"

log using "L:\LovbeskyttetMapper\Face your Fears\Carsten\dacobs_inflex_delscore_t1",text replace

//WITHOUT ADJUSTMENT FOR BASELINE IMBALANCES

mi estimate, dots: regress dacobs_inflex_delscore_t1 i.RANDY i.strat_gpts dacobs_inflex_delscore_t0 i.demo_koen_t0 i.demo_studysite_t0

mimrgns i.RANDY

//WITH ADJUSTMENT FOR BASELINE IMBALANCES

mi estimate, dots: regress dacobs_inflex_delscore_t1 i.RANDY i.strat_gpts dacobs_inflex_delscore_t0 i.demo_koen_t0 i.demo_studysite_t0 Automatic_t0 tale_1_4_t0 tale_1_8_t0

mimrgns i.RANDY

log close

log using "L:\LovbeskyttetMapper\Face your Fears\Carsten\dacobs_inflex_delscore_t1",text append

//WITHOUT ADJUSTMENT FOR BASELINE IMBALANCES

mi estimate, dots: regress dacobs_inflex_delscore_t2 i.RANDY i.strat_gpts dacobs_inflex_delscore_t0 i.demo_koen_t0 i.demo_studysite_t0

mimrgns i.RANDY

//WITH ADJUSTMENT FOR BASELINE IMBALANCES

mi estimate, dots: regress dacobs_inflex_delscore_t2 i.RANDY i.strat_gpts dacobs_inflex_delscore_t0 i.demo_koen_t0 i.demo_studysite_t0 Automatic_t0 tale_1_4_t0 tale_1_8_t0

mimrgns i.RANDY

log close

//Mixed model

mi reshape long dacobs_inflex_delscore_t, i(trial number) j(time)

log using "L:\LovbeskyttetMapper\Face your Fears\Carsten\dacobs_inflex_delscore_t1",text append

mi estimate,dots: mixed dacobs_inflex_delscore_t i.RANDY##i.time i.strat_gpts i.demo_koen_t0 i.demo_studysite_t0 || trial number: , noconstant residuals(unstructured,t(time))

mi test 1.RANDY#2.time 1.RANDY#1.time

log close

//Next outcome: dacobs_threat_delscore (Attention for threat (DACOBS))

frame change default

use "L:\LovbeskyttetMapper\Face your Fears\Carsten\Final uden randomisering\fyf_wide_for_analysis.dta" ,clear

cd c:\temp

set seed 11091309

keep tale_1_13_t0 tale_1_17_t0 cdss_totalscore_t0 gse_totalscore_t0 bf_samvittigscore_t0 bf_neuroscore_t0 who5_total_t0 ///

dacobs_threat_delscore_t2 Automatic_t0 trial number tale_1_4_t0 tale_1_8_t0 dacobs_threat_delscore_t1 dacobs_threat_delscore_t0 gpts_b_delscore_t0 demo_koen_t0 demo_studysite_t0 RANDBLIND sbq_avoid_t0

mi set flong

mi register imputed tale_1_13_t0 tale_1_17_t0 cdss_totalscore_t0 gse_totalscore_t0 bf_samvittigscore_t0 bf_neuroscore_t0 who5_total_t0 ///

Automatic_t0 tale_1_4_t0 tale_1_8_t0 dacobs_threat_delscore_t1 dacobs_threat_delscore_t2 dacobs_threat_delscore_t0

mi impute mvn tale_1_13_t0 tale_1_17_t0 cdss_totalscore_t0 gse_totalscore_t0 bf_samvittigscore_t0 bf_neuroscore_t0 who5_total_t0 ///

Automatic_t0 tale_1_4_t0 tale_1_8_t0 dacobs_threat_delscore_t1 dacobs_threat_delscore_t2 dacobs_threat_delscore_t0 = gpts_b_delscore_t0 sbq_avoid_t0 demo_koen_t0 demo_studysite_t0, prior(jeffreys) add(100) by(RANDBLIND)

gen strat_gpts= gpts_b_delscore_t0>=45

gen RANDY=RANDBLIND=="Y"

log using "L:\LovbeskyttetMapper\Face your Fears\Carsten\dacobs_threat_delscore_t1",text replace

//WITHOUT ADJUSTMENT FOR BASELINE IMBALANCES

mi estimate, dots: regress dacobs_threat_delscore_t1 i.RANDY i.strat_gpts dacobs_threat_delscore_t0 i.demo_koen_t0 i.demo_studysite_t0

mimrgns i.RANDY

//WITH ADJUSTMENT FOR BASELINE IMBALANCES

mi estimate, dots: regress dacobs_threat_delscore_t1 i.RANDY i.strat_gpts dacobs_threat_delscore_t0 i.demo_koen_t0 i.demo_studysite_t0 Automatic_t0 tale_1_4_t0 tale_1_8_t0

mimrgns i.RANDY

log close

log using "L:\LovbeskyttetMapper\Face your Fears\Carsten\dacobs_threat_delscore_t1",text append

//WITHOUT ADJUSTMENT FOR BASELINE IMBALANCES

mi estimate, dots: regress dacobs_threat_delscore_t2 i.RANDY i.strat_gpts dacobs_threat_delscore_t0 i.demo_koen_t0 i.demo_studysite_t0

mimrgns i.RANDY

//WITH ADJUSTMENT FOR BASELINE IMBALANCES

mi estimate, dots: regress dacobs_threat_delscore_t2 i.RANDY i.strat_gpts dacobs_threat_delscore_t0 i.demo_koen_t0 i.demo_studysite_t0 Automatic_t0 tale_1_4_t0 tale_1_8_t0

mimrgns i.RANDY

log close

//Mixed model

mi reshape long dacobs_threat_delscore_t, i(trial number) j(time)

log using "L:\LovbeskyttetMapper\Face your Fears\Carsten\dacobs_threat_delscore_t1",text append

mi estimate,dots: mixed dacobs_threat_delscore_t i.RANDY##i.time i.strat_gpts i.demo_koen_t0 i.demo_studysite_t0 || trial number: , noconstant residuals(unstructured,t(time))

mi test 1.RANDY#2.time 1.RANDY#1.time

log close

//Next outcome: dacobs_extattrib_delscore (External attribution (DACOBS))

frame change default

use "L:\LovbeskyttetMapper\Face your Fears\Carsten\Final uden randomisering\fyf_wide_for_analysis.dta" ,clear

cd c:\temp

set seed 1109130

keep tale_1_13_t0 tale_1_17_t0 cdss_totalscore_t0 gse_totalscore_t0 bf_samvittigscore_t0 bf_neuroscore_t0 who5_total_t0 ///

dacobs_extattrib_delscore_t2 Automatic_t0 trial number tale_1_4_t0 tale_1_8_t0 dacobs_extattrib_delscore_t1 dacobs_extattrib_delscore_t0 gpts_b_delscore_t0 demo_koen_t0 demo_studysite_t0 RANDBLIND sbq_avoid_t0

mi set flong

mi register imputed tale_1_13_t0 tale_1_17_t0 cdss_totalscore_t0 gse_totalscore_t0 bf_samvittigscore_t0 bf_neuroscore_t0 who5_total_t0 ///

Automatic_t0 tale_1_4_t0 tale_1_8_t0 dacobs_extattrib_delscore_t1 dacobs_extattrib_delscore_t2 dacobs_extattrib_delscore_t0

mi impute mvn tale_1_13_t0 tale_1_17_t0 cdss_totalscore_t0 gse_totalscore_t0 bf_samvittigscore_t0 bf_neuroscore_t0 who5_total_t0 ///

Automatic_t0 tale_1_4_t0 tale_1_8_t0 dacobs_extattrib_delscore_t1 dacobs_extattrib_delscore_t2 dacobs_extattrib_delscore_t0 = gpts_b_delscore_t0 sbq_avoid_t0 demo_koen_t0 demo_studysite_t0, prior(jeffreys) add(100) by(RANDBLIND)

gen strat_gpts= gpts_b_delscore_t0>=45

gen RANDY=RANDBLIND=="Y"

log using "L:\LovbeskyttetMapper\Face your Fears\Carsten\dacobs_extattrib_delscore_t1",text replace

//WITHOUT ADJUSTMENT FOR BASELINE IMBALANCES

mi estimate, dots: regress dacobs_extattrib_delscore_t1 i.RANDY i.strat_gpts dacobs_extattrib_delscore_t0 i.demo_koen_t0 i.demo_studysite_t0

mimrgns i.RANDY

//WITH ADJUSTMENT FOR BASELINE IMBALANCES

mi estimate, dots: regress dacobs_extattrib_delscore_t1 i.RANDY i.strat_gpts dacobs_extattrib_delscore_t0 i.demo_koen_t0 i.demo_studysite_t0 Automatic_t0 tale_1_4_t0 tale_1_8_t0

mimrgns i.RANDY

log close

log using "L:\LovbeskyttetMapper\Face your Fears\Carsten\dacobs_extattrib_delscore_t1",text append

//WITHOUT ADJUSTMENT FOR BASELINE IMBALANCES

mi estimate, dots: regress dacobs_extattrib_delscore_t2 i.RANDY i.strat_gpts dacobs_extattrib_delscore_t0 i.demo_koen_t0 i.demo_studysite_t0

mimrgns i.RANDY

//WITH ADJUSTMENT FOR BASELINE IMBALANCES

mi estimate, dots: regress dacobs_extattrib_delscore_t2 i.RANDY i.strat_gpts dacobs_extattrib_delscore_t0 i.demo_koen_t0 i.demo_studysite_t0 Automatic_t0 tale_1_4_t0 tale_1_8_t0

mimrgns i.RANDY

log close

//Mixed model

mi reshape long dacobs_extattrib_delscore_t, i(trial number) j(time)

log using "L:\LovbeskyttetMapper\Face your Fears\Carsten\dacobs_extattrib_delscore_t1",text append

mi estimate,dots: mixed dacobs_extattrib_delscore_t i.RANDY##i.time i.strat_gpts i.demo_koen_t0 i.demo_studysite_t0 || trial number: , noconstant residuals(unstructured,t(time))

mi test 1.RANDY#2.time 1.RANDY#1.time

log close

//Next outcome: dacobs_soccog_delscore (Social cognitive problems (DACOBS))

frame change default

use "L:\LovbeskyttetMapper\Face your Fears\Carsten\Final uden randomisering\fyf_wide_for_analysis.dta" ,clear

cd c:\temp

set seed 11091305

keep tale_1_13_t0 tale_1_17_t0 cdss_totalscore_t0 gse_totalscore_t0 bf_samvittigscore_t0 bf_neuroscore_t0 who5_total_t0 ///

dacobs_soccog_delscore_t2 Automatic_t0 trial number tale_1_4_t0 tale_1_8_t0 dacobs_soccog_delscore_t1 dacobs_soccog_delscore_t0 gpts_b_delscore_t0 demo_koen_t0 demo_studysite_t0 RANDBLIND sbq_avoid_t0

mi set flong

mi register imputed tale_1_13_t0 tale_1_17_t0 cdss_totalscore_t0 gse_totalscore_t0 bf_samvittigscore_t0 bf_neuroscore_t0 who5_total_t0 ///

Automatic_t0 tale_1_4_t0 tale_1_8_t0 dacobs_soccog_delscore_t1 dacobs_soccog_delscore_t2 dacobs_soccog_delscore_t0

mi impute mvn tale_1_13_t0 tale_1_17_t0 cdss_totalscore_t0 gse_totalscore_t0 bf_samvittigscore_t0 bf_neuroscore_t0 who5_total_t0 ///

Automatic_t0 tale_1_4_t0 tale_1_8_t0 dacobs_soccog_delscore_t1 dacobs_soccog_delscore_t2 dacobs_soccog_delscore_t0 = gpts_b_delscore_t0 sbq_avoid_t0 demo_koen_t0 demo_studysite_t0, prior(jeffreys) add(100) by(RANDBLIND)

gen strat_gpts= gpts_b_delscore_t0>=45

gen RANDY=RANDBLIND=="Y"

log using "L:\LovbeskyttetMapper\Face your Fears\Carsten\dacobs_soccog_delscore_t1",text replace

//WITHOUT ADJUSTMENT FOR BASELINE IMBALANCES

mi estimate, dots: regress dacobs_soccog_delscore_t1 i.RANDY i.strat_gpts dacobs_soccog_delscore_t0 i.demo_koen_t0 i.demo_studysite_t0

mimrgns i.RANDY

//WITH ADJUSTMENT FOR BASELINE IMBALANCES

mi estimate, dots: regress dacobs_soccog_delscore_t1 i.RANDY i.strat_gpts dacobs_soccog_delscore_t0 i.demo_koen_t0 i.demo_studysite_t0 Automatic_t0 tale_1_4_t0 tale_1_8_t0

mimrgns i.RANDY

log close

log using "L:\LovbeskyttetMapper\Face your Fears\Carsten\dacobs_soccog_delscore_t1",text append

//WITHOUT ADJUSTMENT FOR BASELINE IMBALANCES

mi estimate, dots: regress dacobs_soccog_delscore_t2 i.RANDY i.strat_gpts dacobs_soccog_delscore_t0 i.demo_koen_t0 i.demo_studysite_t0

mimrgns i.RANDY

//WITH ADJUSTMENT FOR BASELINE IMBALANCES

mi estimate, dots: regress dacobs_soccog_delscore_t2 i.RANDY i.strat_gpts dacobs_soccog_delscore_t0 i.demo_koen_t0 i.demo_studysite_t0 Automatic_t0 tale_1_4_t0 tale_1_8_t0

mimrgns i.RANDY

log close

//Mixed model

mi reshape long dacobs_soccog_delscore_t, i(trial number) j(time)

log using "L:\LovbeskyttetMapper\Face your Fears\Carsten\dacobs_soccog_delscore_t1",text append

mi estimate,dots: mixed dacobs_soccog_delscore_t i.RANDY##i.time i.strat_gpts i.demo_koen_t0 i.demo_studysite_t0 || trial number: , noconstant residuals(unstructured,t(time))

mi test 1.RANDY#2.time 1.RANDY#1.time

log close

//Next outcome: dacobs_subcog_delscore (Subjective cognitive problems (DACOBS))

frame change default

use "L:\LovbeskyttetMapper\Face your Fears\Carsten\Final uden randomisering\fyf_wide_for_analysis.dta" ,clear

cd c:\temp

set seed 11091318

keep tale_1_13_t0 tale_1_17_t0 cdss_totalscore_t0 gse_totalscore_t0 bf_samvittigscore_t0 bf_neuroscore_t0 who5_total_t0 ///

dacobs_subcog_delscore_t2 Automatic_t0 trial number tale_1_4_t0 tale_1_8_t0 dacobs_subcog_delscore_t1 dacobs_subcog_delscore_t0 gpts_b_delscore_t0 demo_koen_t0 demo_studysite_t0 RANDBLIND sbq_avoid_t0

mi set flong

mi register imputed tale_1_13_t0 tale_1_17_t0 cdss_totalscore_t0 gse_totalscore_t0 bf_samvittigscore_t0 bf_neuroscore_t0 who5_total_t0 ///

Automatic_t0 tale_1_4_t0 tale_1_8_t0 dacobs_subcog_delscore_t1 dacobs_subcog_delscore_t2 dacobs_subcog_delscore_t0

mi impute mvn tale_1_13_t0 tale_1_17_t0 cdss_totalscore_t0 gse_totalscore_t0 bf_samvittigscore_t0 bf_neuroscore_t0 who5_total_t0 ///

Automatic_t0 tale_1_4_t0 tale_1_8_t0 dacobs_subcog_delscore_t1 dacobs_subcog_delscore_t2 dacobs_subcog_delscore_t0 = gpts_b_delscore_t0 sbq_avoid_t0 demo_koen_t0 demo_studysite_t0, prior(jeffreys) add(100) by(RANDBLIND)

gen strat_gpts= gpts_b_delscore_t0>=45

gen RANDY=RANDBLIND=="Y"

log using "L:\LovbeskyttetMapper\Face your Fears\Carsten\dacobs_subcog_delscore_t1",text replace

//WITHOUT ADJUSTMENT FOR BASELINE IMBALANCES

mi estimate, dots: regress dacobs_subcog_delscore_t1 i.RANDY i.strat_gpts dacobs_subcog_delscore_t0 i.demo_koen_t0 i.demo_studysite_t0

mimrgns i.RANDY

//WITH ADJUSTMENT FOR BASELINE IMBALANCES

mi estimate, dots: regress dacobs_subcog_delscore_t1 i.RANDY i.strat_gpts dacobs_subcog_delscore_t0 i.demo_koen_t0 i.demo_studysite_t0 Automatic_t0 tale_1_4_t0 tale_1_8_t0

mimrgns i.RANDY

log close

log using "L:\LovbeskyttetMapper\Face your Fears\Carsten\dacobs_subcog_delscore_t1",text append

//WITHOUT ADJUSTMENT FOR BASELINE IMBALANCES

mi estimate, dots: regress dacobs_subcog_delscore_t2 i.RANDY i.strat_gpts dacobs_subcog_delscore_t0 i.demo_koen_t0 i.demo_studysite_t0

mimrgns i.RANDY

//WITH ADJUSTMENT FOR BASELINE IMBALANCES

mi estimate, dots: regress dacobs_subcog_delscore_t2 i.RANDY i.strat_gpts dacobs_subcog_delscore_t0 i.demo_koen_t0 i.demo_studysite_t0 Automatic_t0 tale_1_4_t0 tale_1_8_t0

mimrgns i.RANDY

log close

//Mixed model

mi reshape long dacobs_subcog_delscore_t, i(trial number) j(time)

log using "L:\LovbeskyttetMapper\Face your Fears\Carsten\dacobs_subcog_delscore_t1",text append

mi estimate,dots: mixed dacobs_subcog_delscore_t i.RANDY##i.time i.strat_gpts i.demo_koen_t0 i.demo_studysite_t0 || trial number: , noconstant residuals(unstructured,t(time))

mi test 1.RANDY#2.time 1.RANDY#1.time

log close

//Next outcome: dacobs_safebeh_delscore (Safety behavior (DACOBS))

frame change default

use "L:\LovbeskyttetMapper\Face your Fears\Carsten\Final uden randomisering\fyf_wide_for_analysis.dta" ,clear

cd c:\temp

set seed 11091320

keep tale_1_13_t0 tale_1_17_t0 cdss_totalscore_t0 gse_totalscore_t0 bf_samvittigscore_t0 bf_neuroscore_t0 who5_total_t0 ///

dacobs_safebeh_delscore_t2 Automatic_t0 trial number tale_1_4_t0 tale_1_8_t0 dacobs_safebeh_delscore_t1 dacobs_safebeh_delscore_t0 gpts_b_delscore_t0 demo_koen_t0 demo_studysite_t0 RANDBLIND sbq_avoid_t0

mi set flong

mi register imputed tale_1_13_t0 tale_1_17_t0 cdss_totalscore_t0 gse_totalscore_t0 bf_samvittigscore_t0 bf_neuroscore_t0 who5_total_t0 ///

Automatic_t0 tale_1_4_t0 tale_1_8_t0 dacobs_safebeh_delscore_t1 dacobs_safebeh_delscore_t2 dacobs_safebeh_delscore_t0

mi impute mvn tale_1_13_t0 tale_1_17_t0 cdss_totalscore_t0 gse_totalscore_t0 bf_samvittigscore_t0 bf_neuroscore_t0 who5_total_t0 ///

Automatic_t0 tale_1_4_t0 tale_1_8_t0 dacobs_safebeh_delscore_t1 dacobs_safebeh_delscore_t2 dacobs_safebeh_delscore_t0 = gpts_b_delscore_t0 sbq_avoid_t0 demo_koen_t0 demo_studysite_t0, prior(jeffreys) add(100) by(RANDBLIND)

gen strat_gpts= gpts_b_delscore_t0>=45

gen RANDY=RANDBLIND=="Y"

log using "L:\LovbeskyttetMapper\Face your Fears\Carsten\dacobs_safebeh_delscore_t1",text replace

//WITHOUT ADJUSTMENT FOR BASELINE IMBALANCES

mi estimate, dots: regress dacobs_safebeh_delscore_t1 i.RANDY i.strat_gpts dacobs_safebeh_delscore_t0 i.demo_koen_t0 i.demo_studysite_t0

mimrgns i.RANDY

//WITH ADJUSTMENT FOR BASELINE IMBALANCES

mi estimate, dots: regress dacobs_safebeh_delscore_t1 i.RANDY i.strat_gpts dacobs_safebeh_delscore_t0 i.demo_koen_t0 i.demo_studysite_t0 Automatic_t0 tale_1_4_t0 tale_1_8_t0

mimrgns i.RANDY

log close

log using "L:\LovbeskyttetMapper\Face your Fears\Carsten\dacobs_safebeh_delscore_t1",text append

//WITHOUT ADJUSTMENT FOR BASELINE IMBALANCES

mi estimate, dots: regress dacobs_safebeh_delscore_t2 i.RANDY i.strat_gpts dacobs_safebeh_delscore_t0 i.demo_koen_t0 i.demo_studysite_t0

mimrgns i.RANDY

//WITH ADJUSTMENT FOR BASELINE IMBALANCES

mi estimate, dots: regress dacobs_safebeh_delscore_t2 i.RANDY i.strat_gpts dacobs_safebeh_delscore_t0 i.demo_koen_t0 i.demo_studysite_t0 Automatic_t0 tale_1_4_t0 tale_1_8_t0

mimrgns i.RANDY

log close

//Mixed model

mi reshape long dacobs_safebeh_delscore_t, i(trial number) j(time)

log using "L:\LovbeskyttetMapper\Face your Fears\Carsten\dacobs_safebeh_delscore_t1",text append

mi estimate,dots: mixed dacobs_safebeh_delscore_t i.RANDY##i.time i.strat_gpts i.demo_koen_t0 i.demo_studysite_t0 || trial number: , noconstant residuals(unstructured,t(time))

mi test 1.RANDY#2.time 1.RANDY#1.time

log close

//Next outcome: sfs_soc_tilb_skaleret (SFS – Social engagement/withdrawal)

capture noisily frame create more

frame change more

use "l:\LovbeskyttetMapper\Face your Fears\Carsten\Final uden randomisering\MORETEMP.dta",clear

frame change default

use "L:\LovbeskyttetMapper\Face your Fears\Carsten\Final uden randomisering\fyf_wide_for_analysis.dta" ,clear

frlink 1:1 trial number, frame(more)

drop sfs_soc_tilb_skaleret_t1 sfs_soc_tilb_skaleret_t2

frget sfs_soc_tilb_skaleret_t1 sfs_soc_tilb_skaleret_t2,from(more)

cd c:\temp

set seed 11091345

keep tale_1_13_t0 tale_1_17_t0 cdss_totalscore_t0 gse_totalscore_t0 bf_samvittigscore_t0 bf_neuroscore_t0 who5_total_t0 ///

sfs_soc_tilb_skaleret_t2 Automatic_t0 trial number tale_1_4_t0 tale_1_8_t0 sfs_soc_tilb_skaleret_t1 sfs_soc_tilb_skaleret_t0 gpts_b_delscore_t0 demo_koen_t0 demo_studysite_t0 RANDBLIND sbq_avoid_t0

mi set flong

mi register imputed tale_1_13_t0 tale_1_17_t0 cdss_totalscore_t0 gse_totalscore_t0 bf_samvittigscore_t0 bf_neuroscore_t0 who5_total_t0 ///

Automatic_t0 tale_1_4_t0 tale_1_8_t0 sfs_soc_tilb_skaleret_t1 sfs_soc_tilb_skaleret_t2 sfs_soc_tilb_skaleret_t0

mi impute mvn tale_1_13_t0 tale_1_17_t0 cdss_totalscore_t0 gse_totalscore_t0 bf_samvittigscore_t0 bf_neuroscore_t0 who5_total_t0 ///

Automatic_t0 tale_1_4_t0 tale_1_8_t0 sfs_soc_tilb_skaleret_t1 sfs_soc_tilb_skaleret_t2 sfs_soc_tilb_skaleret_t0 = gpts_b_delscore_t0 sbq_avoid_t0 demo_koen_t0 demo_studysite_t0, prior(jeffreys) add(100) by(RANDBLIND)

gen strat_gpts= gpts_b_delscore_t0>=45

gen RANDY=RANDBLIND=="Y"

log using "L:\LovbeskyttetMapper\Face your Fears\Carsten\sfs_soc_tilb_skaleret_t1",text replace

//WITHOUT ADJUSTMENT FOR BASELINE IMBALANCES

mi estimate, dots: regress sfs_soc_tilb_skaleret_t1 i.RANDY i.strat_gpts sfs_soc_tilb_skaleret_t0 i.demo_koen_t0 i.demo_studysite_t0

mimrgns i.RANDY

//WITH ADJUSTMENT FOR BASELINE IMBALANCES

mi estimate, dots: regress sfs_soc_tilb_skaleret_t1 i.RANDY i.strat_gpts sfs_soc_tilb_skaleret_t0 i.demo_koen_t0 i.demo_studysite_t0 Automatic_t0 tale_1_4_t0 tale_1_8_t0

mimrgns i.RANDY

log close

log using "L:\LovbeskyttetMapper\Face your Fears\Carsten\sfs_soc_tilb_skaleret_t1",text append

//WITHOUT ADJUSTMENT FOR BASELINE IMBALANCES

mi estimate, dots: regress sfs_soc_tilb_skaleret_t2 i.RANDY i.strat_gpts sfs_soc_tilb_skaleret_t0 i.demo_koen_t0 i.demo_studysite_t0

mimrgns i.RANDY

//WITH ADJUSTMENT FOR BASELINE IMBALANCES

mi estimate, dots: regress sfs_soc_tilb_skaleret_t2 i.RANDY i.strat_gpts sfs_soc_tilb_skaleret_t0 i.demo_koen_t0 i.demo_studysite_t0 Automatic_t0 tale_1_4_t0 tale_1_8_t0

mimrgns i.RANDY

log close

//Mixed model

mi reshape long sfs_soc_tilb_skaleret_t, i(trial number) j(time)

log using "L:\LovbeskyttetMapper\Face your Fears\Carsten\sfs_soc_tilb_skaleret_t1",text append

mi estimate,dots: mixed sfs_soc_tilb_skaleret_t i.RANDY##i.time i.strat_gpts i.demo_koen_t0 i.demo_studysite_t0 || trial number: , noconstant residuals(unstructured,t(time))

mi test 1.RANDY#2.time 1.RANDY#1.time

log close

//Next outcome: sfs_int_skaleret (SFS – Interpersonal behavior)

capture noisily frame create more

frame change more

use "l:\LovbeskyttetMapper\Face your Fears\Carsten\Final uden randomisering\MORETEMP.dta",clear

frame change default

use "L:\LovbeskyttetMapper\Face your Fears\Carsten\Final uden randomisering\fyf_wide_for_analysis.dta" ,clear

frlink 1:1 trial number, frame(more)

drop sfs_int_skaleret_t1 sfs_int_skaleret_t2

frget sfs_int_skaleret_t1 sfs_int_skaleret_t2,from(more)

cd c:\temp

set seed 11091347

keep tale_1_13_t0 tale_1_17_t0 cdss_totalscore_t0 gse_totalscore_t0 bf_samvittigscore_t0 bf_neuroscore_t0 who5_total_t0 ///

sfs_int_skaleret_t2 Automatic_t0 trial number tale_1_4_t0 tale_1_8_t0 sfs_int_skaleret_t1 sfs_int_skaleret_t0 gpts_b_delscore_t0 demo_koen_t0 demo_studysite_t0 RANDBLIND sbq_avoid_t0

mi set flong

mi register imputed tale_1_13_t0 tale_1_17_t0 cdss_totalscore_t0 gse_totalscore_t0 bf_samvittigscore_t0 bf_neuroscore_t0 who5_total_t0 ///

Automatic_t0 tale_1_4_t0 tale_1_8_t0 sfs_int_skaleret_t1 sfs_int_skaleret_t2 sfs_int_skaleret_t0

mi impute mvn tale_1_13_t0 tale_1_17_t0 cdss_totalscore_t0 gse_totalscore_t0 bf_samvittigscore_t0 bf_neuroscore_t0 who5_total_t0 ///

Automatic_t0 tale_1_4_t0 tale_1_8_t0 sfs_int_skaleret_t1 sfs_int_skaleret_t2 sfs_int_skaleret_t0 = gpts_b_delscore_t0 sbq_avoid_t0 demo_koen_t0 demo_studysite_t0, prior(jeffreys) add(100) by(RANDBLIND)

gen strat_gpts= gpts_b_delscore_t0>=45

gen RANDY=RANDBLIND=="Y"

log using "L:\LovbeskyttetMapper\Face your Fears\Carsten\sfs_int_skaleret_t1",text replace

//WITHOUT ADJUSTMENT FOR BASELINE IMBALANCES

mi estimate, dots: regress sfs_int_skaleret_t1 i.RANDY i.strat_gpts sfs_int_skaleret_t0 i.demo_koen_t0 i.demo_studysite_t0

mimrgns i.RANDY

//WITH ADJUSTMENT FOR BASELINE IMBALANCES

mi estimate, dots: regress sfs_int_skaleret_t1 i.RANDY i.strat_gpts sfs_int_skaleret_t0 i.demo_koen_t0 i.demo_studysite_t0 Automatic_t0 tale_1_4_t0 tale_1_8_t0

mimrgns i.RANDY

log close

log using "L:\LovbeskyttetMapper\Face your Fears\Carsten\sfs_int_skaleret_t1",text append

//WITHOUT ADJUSTMENT FOR BASELINE IMBALANCES

mi estimate, dots: regress sfs_int_skaleret_t2 i.RANDY i.strat_gpts sfs_int_skaleret_t0 i.demo_koen_t0 i.demo_studysite_t0

mimrgns i.RANDY

//WITH ADJUSTMENT FOR BASELINE IMBALANCES

mi estimate, dots: regress sfs_int_skaleret_t2 i.RANDY i.strat_gpts sfs_int_skaleret_t0 i.demo_koen_t0 i.demo_studysite_t0 Automatic_t0 tale_1_4_t0 tale_1_8_t0

mimrgns i.RANDY

log close

//Mixed model

mi reshape long sfs_int_skaleret_t, i(trial number) j(time)

log using "L:\LovbeskyttetMapper\Face your Fears\Carsten\sfs_int_skaleret_t1",text append

mi estimate,dots: mixed sfs_int_skaleret_t i.RANDY##i.time i.strat_gpts i.demo_koen_t0 i.demo_studysite_t0 || trial number: , noconstant residuals(unstructured,t(time))

mi test 1.RANDY#2.time 1.RANDY#1.time

log close

//Next outcome: sfs_rekr_skaleret (SFS – Recreation)

capture noisily frame create more

frame change more

use "l:\LovbeskyttetMapper\Face your Fears\Carsten\Final uden randomisering\MORETEMP.dta",clear

frame change default

use "L:\LovbeskyttetMapper\Face your Fears\Carsten\Final uden randomisering\fyf_wide_for_analysis.dta" ,clear

frlink 1:1 trial number, frame(more)

drop sfs_rekr_skaleret_t1 sfs_rekr_skaleret_t2

frget sfs_rekr_skaleret_t1 sfs_rekr_skaleret_t2,from(more)

cd c:\temp

set seed 11091349

keep tale_1_13_t0 tale_1_17_t0 cdss_totalscore_t0 gse_totalscore_t0 bf_samvittigscore_t0 bf_neuroscore_t0 who5_total_t0 ///

sfs_rekr_skaleret_t2 Automatic_t0 trial number tale_1_4_t0 tale_1_8_t0 sfs_rekr_skaleret_t1 sfs_rekr_skaleret_t0 gpts_b_delscore_t0 demo_koen_t0 demo_studysite_t0 RANDBLIND sbq_avoid_t0

mi set flong

mi register imputed tale_1_13_t0 tale_1_17_t0 cdss_totalscore_t0 gse_totalscore_t0 bf_samvittigscore_t0 bf_neuroscore_t0 who5_total_t0 ///

Automatic_t0 tale_1_4_t0 tale_1_8_t0 sfs_rekr_skaleret_t1 sfs_rekr_skaleret_t2 sfs_rekr_skaleret_t0

mi impute mvn tale_1_13_t0 tale_1_17_t0 cdss_totalscore_t0 gse_totalscore_t0 bf_samvittigscore_t0 bf_neuroscore_t0 who5_total_t0 ///

Automatic_t0 tale_1_4_t0 tale_1_8_t0 sfs_rekr_skaleret_t1 sfs_rekr_skaleret_t2 sfs_rekr_skaleret_t0 = gpts_b_delscore_t0 sbq_avoid_t0 demo_koen_t0 demo_studysite_t0, prior(jeffreys) add(100) by(RANDBLIND)

gen strat_gpts= gpts_b_delscore_t0>=45

gen RANDY=RANDBLIND=="Y"

log using "L:\LovbeskyttetMapper\Face your Fears\Carsten\sfs_rekr_skaleret_t1",text replace

//WITHOUT ADJUSTMENT FOR BASELINE IMBALANCES

mi estimate, dots: regress sfs_rekr_skaleret_t1 i.RANDY i.strat_gpts sfs_rekr_skaleret_t0 i.demo_koen_t0 i.demo_studysite_t0

mimrgns i.RANDY

//WITH ADJUSTMENT FOR BASELINE IMBALANCES

mi estimate, dots: regress sfs_rekr_skaleret_t1 i.RANDY i.strat_gpts sfs_rekr_skaleret_t0 i.demo_koen_t0 i.demo_studysite_t0 Automatic_t0 tale_1_4_t0 tale_1_8_t0

mimrgns i.RANDY

log close

log using "L:\LovbeskyttetMapper\Face your Fears\Carsten\sfs_rekr_skaleret_t1",text append

//WITHOUT ADJUSTMENT FOR BASELINE IMBALANCES

mi estimate, dots: regress sfs_rekr_skaleret_t2 i.RANDY i.strat_gpts sfs_rekr_skaleret_t0 i.demo_koen_t0 i.demo_studysite_t0

mimrgns i.RANDY

//WITH ADJUSTMENT FOR BASELINE IMBALANCES

mi estimate, dots: regress sfs_rekr_skaleret_t2 i.RANDY i.strat_gpts sfs_rekr_skaleret_t0 i.demo_koen_t0 i.demo_studysite_t0 Automatic_t0 tale_1_4_t0 tale_1_8_t0

mimrgns i.RANDY

log close

//Mixed model

mi reshape long sfs_rekr_skaleret_t, i(trial number) j(time)

log using "L:\LovbeskyttetMapper\Face your Fears\Carsten\sfs_rekr_skaleret_t1",text append

mi estimate,dots: mixed sfs_rekr_skaleret_t i.RANDY##i.time i.strat_gpts i.demo_koen_t0 i.demo_studysite_t0 || trial number: , noconstant residuals(unstructured,t(time))

mi test 1.RANDY#2.time 1.RANDY#1.time

log close

//Next outcome: sfs_komp_skaleret (SFS – Independence-competence)

capture noisily frame create more

frame change more

use "l:\LovbeskyttetMapper\Face your Fears\Carsten\Final uden randomisering\MORETEMP.dta",clear

frame change default

use "L:\LovbeskyttetMapper\Face your Fears\Carsten\Final uden randomisering\fyf_wide_for_analysis.dta" ,clear

frlink 1:1 trial number, frame(more)

drop sfs_komp_skaleret_t1 sfs_komp_skaleret_t2

frget sfs_komp_skaleret_t1 sfs_komp_skaleret_t2,from(more)

cd c:\temp

set seed 11091351

keep tale_1_13_t0 tale_1_17_t0 cdss_totalscore_t0 gse_totalscore_t0 bf_samvittigscore_t0 bf_neuroscore_t0 who5_total_t0 ///

sfs_komp_skaleret_t2 Automatic_t0 trial number tale_1_4_t0 tale_1_8_t0 sfs_komp_skaleret_t1 sfs_komp_skaleret_t0 gpts_b_delscore_t0 demo_koen_t0 demo_studysite_t0 RANDBLIND sbq_avoid_t0

mi set flong

mi register imputed tale_1_13_t0 tale_1_17_t0 cdss_totalscore_t0 gse_totalscore_t0 bf_samvittigscore_t0 bf_neuroscore_t0 who5_total_t0 ///

Automatic_t0 tale_1_4_t0 tale_1_8_t0 sfs_komp_skaleret_t1 sfs_komp_skaleret_t2 sfs_komp_skaleret_t0

mi impute mvn tale_1_13_t0 tale_1_17_t0 cdss_totalscore_t0 gse_totalscore_t0 bf_samvittigscore_t0 bf_neuroscore_t0 who5_total_t0 ///

Automatic_t0 tale_1_4_t0 tale_1_8_t0 sfs_komp_skaleret_t1 sfs_komp_skaleret_t2 sfs_komp_skaleret_t0 = gpts_b_delscore_t0 sbq_avoid_t0 demo_koen_t0 demo_studysite_t0, prior(jeffreys) add(100) by(RANDBLIND)

gen strat_gpts= gpts_b_delscore_t0>=45

gen RANDY=RANDBLIND=="Y"

log using "L:\LovbeskyttetMapper\Face your Fears\Carsten\sfs_komp_skaleret_t1",text replace

//WITHOUT ADJUSTMENT FOR BASELINE IMBALANCES

mi estimate, dots: regress sfs_komp_skaleret_t1 i.RANDY i.strat_gpts sfs_komp_skaleret_t0 i.demo_koen_t0 i.demo_studysite_t0

mimrgns i.RANDY

//WITH ADJUSTMENT FOR BASELINE IMBALANCES

mi estimate, dots: regress sfs_komp_skaleret_t1 i.RANDY i.strat_gpts sfs_komp_skaleret_t0 i.demo_koen_t0 i.demo_studysite_t0 Automatic_t0 tale_1_4_t0 tale_1_8_t0

mimrgns i.RANDY

log close

log using "L:\LovbeskyttetMapper\Face your Fears\Carsten\sfs_komp_skaleret_t1",text append

//WITHOUT ADJUSTMENT FOR BASELINE IMBALANCES

mi estimate, dots: regress sfs_komp_skaleret_t2 i.RANDY i.strat_gpts sfs_komp_skaleret_t0 i.demo_koen_t0 i.demo_studysite_t0

mimrgns i.RANDY

//WITH ADJUSTMENT FOR BASELINE IMBALANCES

mi estimate, dots: regress sfs_komp_skaleret_t2 i.RANDY i.strat_gpts sfs_komp_skaleret_t0 i.demo_koen_t0 i.demo_studysite_t0 Automatic_t0 tale_1_4_t0 tale_1_8_t0

mimrgns i.RANDY

log close

//Mixed model

mi reshape long sfs_komp_skaleret_t, i(trial number) j(time)

log using "L:\LovbeskyttetMapper\Face your Fears\Carsten\sfs_komp_skaleret_t1",text append

mi estimate,dots: mixed sfs_komp_skaleret_t i.RANDY##i.time i.strat_gpts i.demo_koen_t0 i.demo_studysite_t0 || trial number: , noconstant residuals(unstructured,t(time))

mi test 1.RANDY#2.time 1.RANDY#1.time

log close

//Next outcome: sfs_uaf_skaleret (SFS – Independence-performance)

capture noisily frame create more

frame change more

use "l:\LovbeskyttetMapper\Face your Fears\Carsten\Final uden randomisering\MORETEMP.dta",clear

frame change default

use "L:\LovbeskyttetMapper\Face your Fears\Carsten\Final uden randomisering\fyf_wide_for_analysis.dta" ,clear

frlink 1:1 trial number, frame(more)

drop sfs_uaf_skaleret_t1 sfs_uaf_skaleret_t2

frget sfs_uaf_skaleret_t1 sfs_uaf_skaleret_t2,from(more)

cd c:\temp

set seed 11091354

keep tale_1_13_t0 tale_1_17_t0 cdss_totalscore_t0 gse_totalscore_t0 bf_samvittigscore_t0 bf_neuroscore_t0 who5_total_t0 ///

sfs_uaf_skaleret_t2 Automatic_t0 trial number tale_1_4_t0 tale_1_8_t0 sfs_uaf_skaleret_t1 sfs_uaf_skaleret_t0 gpts_b_delscore_t0 demo_koen_t0 demo_studysite_t0 RANDBLIND sbq_avoid_t0

mi set flong

mi register imputed tale_1_13_t0 tale_1_17_t0 cdss_totalscore_t0 gse_totalscore_t0 bf_samvittigscore_t0 bf_neuroscore_t0 who5_total_t0 ///

Automatic_t0 tale_1_4_t0 tale_1_8_t0 sfs_uaf_skaleret_t1 sfs_uaf_skaleret_t2 sfs_uaf_skaleret_t0

mi impute mvn tale_1_13_t0 tale_1_17_t0 cdss_totalscore_t0 gse_totalscore_t0 bf_samvittigscore_t0 bf_neuroscore_t0 who5_total_t0 ///

Automatic_t0 tale_1_4_t0 tale_1_8_t0 sfs_uaf_skaleret_t1 sfs_uaf_skaleret_t2 sfs_uaf_skaleret_t0 = gpts_b_delscore_t0 sbq_avoid_t0 demo_koen_t0 demo_studysite_t0, prior(jeffreys) add(100) by(RANDBLIND)

gen strat_gpts= gpts_b_delscore_t0>=45

gen RANDY=RANDBLIND=="Y"

log using "L:\LovbeskyttetMapper\Face your Fears\Carsten\sfs_uaf_skaleret_t1",text replace

//WITHOUT ADJUSTMENT FOR BASELINE IMBALANCES

mi estimate, dots: regress sfs_uaf_skaleret_t1 i.RANDY i.strat_gpts sfs_uaf_skaleret_t0 i.demo_koen_t0 i.demo_studysite_t0

mimrgns i.RANDY

//WITH ADJUSTMENT FOR BASELINE IMBALANCES

mi estimate, dots: regress sfs_uaf_skaleret_t1 i.RANDY i.strat_gpts sfs_uaf_skaleret_t0 i.demo_koen_t0 i.demo_studysite_t0 Automatic_t0 tale_1_4_t0 tale_1_8_t0

mimrgns i.RANDY

log close

log using "L:\LovbeskyttetMapper\Face your Fears\Carsten\sfs_uaf_skaleret_t1",text append

//WITHOUT ADJUSTMENT FOR BASELINE IMBALANCES

mi estimate, dots: regress sfs_uaf_skaleret_t2 i.RANDY i.strat_gpts sfs_uaf_skaleret_t0 i.demo_koen_t0 i.demo_studysite_t0

mimrgns i.RANDY

//WITH ADJUSTMENT FOR BASELINE IMBALANCES

mi estimate, dots: regress sfs_uaf_skaleret_t2 i.RANDY i.strat_gpts sfs_uaf_skaleret_t0 i.demo_koen_t0 i.demo_studysite_t0 Automatic_t0 tale_1_4_t0 tale_1_8_t0

mimrgns i.RANDY

log close

//Mixed model

mi reshape long sfs_uaf_skaleret_t, i(trial number) j(time)

log using "L:\LovbeskyttetMapper\Face your Fears\Carsten\sfs_uaf_skaleret_t1",text append

mi estimate,dots: mixed sfs_uaf_skaleret_t i.RANDY##i.time i.strat_gpts i.demo_koen_t0 i.demo_studysite_t0 || trial number: , noconstant residuals(unstructured,t(time))

mi test 1.RANDY#2.time 1.RANDY#1.time

log close

//Next outcome: sfs_job_skaleret (SFS – Employment-occupation)

capture noisily frame create more

frame change more

use "l:\LovbeskyttetMapper\Face your Fears\Carsten\Final uden randomisering\MORETEMP.dta",clear

frame change default

use "L:\LovbeskyttetMapper\Face your Fears\Carsten\Final uden randomisering\fyf_wide_for_analysis.dta" ,clear

frlink 1:1 trial number, frame(more)

drop sfs_job_skaleret_t1 sfs_job_skaleret_t2

frget sfs_job_skaleret_t1 sfs_job_skaleret_t2,from(more)

cd c:\temp

set seed 11091356

keep tale_1_13_t0 tale_1_17_t0 cdss_totalscore_t0 gse_totalscore_t0 bf_samvittigscore_t0 bf_neuroscore_t0 who5_total_t0 ///

sfs_job_skaleret_t2 Automatic_t0 trial number tale_1_4_t0 tale_1_8_t0 sfs_job_skaleret_t1 sfs_job_skaleret_t0 gpts_b_delscore_t0 demo_koen_t0 demo_studysite_t0 RANDBLIND sbq_avoid_t0

mi set flong

destring sfs_job_skaleret*,replace dpcomma

mi register imputed tale_1_13_t0 tale_1_17_t0 cdss_totalscore_t0 gse_totalscore_t0 bf_samvittigscore_t0 bf_neuroscore_t0 who5_total_t0 ///

Automatic_t0 tale_1_4_t0 tale_1_8_t0 sfs_job_skaleret_t1 sfs_job_skaleret_t2 sfs_job_skaleret_t0

mi impute mvn tale_1_13_t0 tale_1_17_t0 cdss_totalscore_t0 gse_totalscore_t0 bf_samvittigscore_t0 bf_neuroscore_t0 who5_total_t0 ///

Automatic_t0 tale_1_4_t0 tale_1_8_t0 sfs_job_skaleret_t1 sfs_job_skaleret_t2 sfs_job_skaleret_t0 = gpts_b_delscore_t0 sbq_avoid_t0 demo_koen_t0 demo_studysite_t0, prior(jeffreys) add(100) by(RANDBLIND)

gen strat_gpts= gpts_b_delscore_t0>=45

gen RANDY=RANDBLIND=="Y"

log using "L:\LovbeskyttetMapper\Face your Fears\Carsten\sfs_job_skaleret_t1",text replace

//WITHOUT ADJUSTMENT FOR BASELINE IMBALANCES

mi estimate, dots: regress sfs_job_skaleret_t1 i.RANDY i.strat_gpts sfs_job_skaleret_t0 i.demo_koen_t0 i.demo_studysite_t0

mimrgns i.RANDY

//WITH ADJUSTMENT FOR BASELINE IMBALANCES

mi estimate, dots: regress sfs_job_skaleret_t1 i.RANDY i.strat_gpts sfs_job_skaleret_t0 i.demo_koen_t0 i.demo_studysite_t0 Automatic_t0 tale_1_4_t0 tale_1_8_t0

mimrgns i.RANDY

log close

log using "L:\LovbeskyttetMapper\Face your Fears\Carsten\sfs_job_skaleret_t1",text append

//WITHOUT ADJUSTMENT FOR BASELINE IMBALANCES

mi estimate, dots: regress sfs_job_skaleret_t2 i.RANDY i.strat_gpts sfs_job_skaleret_t0 i.demo_koen_t0 i.demo_studysite_t0

mimrgns i.RANDY

//WITH ADJUSTMENT FOR BASELINE IMBALANCES

mi estimate, dots: regress sfs_job_skaleret_t2 i.RANDY i.strat_gpts sfs_job_skaleret_t0 i.demo_koen_t0 i.demo_studysite_t0 Automatic_t0 tale_1_4_t0 tale_1_8_t0

mimrgns i.RANDY

log close

//Mixed model

mi reshape long sfs_job_skaleret_t, i(trial number) j(time)

log using "L:\LovbeskyttetMapper\Face your Fears\Carsten\sfs_job_skaleret_t1",text append

mi estimate,dots: mixed sfs_job_skaleret_t i.RANDY##i.time i.strat_gpts i.demo_koen_t0 i.demo_studysite_t0 || trial number: , noconstant residuals(unstructured,t(time))

mi test 1.RANDY#2.time 1.RANDY#1.time

log close

//Next outcome: gse_totalscore

frame change default

use "L:\LovbeskyttetMapper\Face your Fears\Carsten\Final uden randomisering\fyf_wide_for_analysis.dta" ,clear

cd c:\temp

set seed 11091359

keep tale_1_13_t0 tale_1_17_t0 cdss_totalscore_t0 gse_totalscore_t0 bf_samvittigscore_t0 bf_neuroscore_t0 who5_total_t0 ///

gse_totalscore_t2 Automatic_t0 trial number tale_1_4_t0 tale_1_8_t0 gse_totalscore_t1 gse_totalscore_t0 gpts_b_delscore_t0 demo_koen_t0 demo_studysite_t0 RANDBLIND sbq_avoid_t0

mi set flong

destring gse_totalscore*,replace dpcomma

mi register imputed tale_1_13_t0 tale_1_17_t0 cdss_totalscore_t0 bf_samvittigscore_t0 bf_neuroscore_t0 who5_total_t0 ///

Automatic_t0 tale_1_4_t0 tale_1_8_t0 gse_totalscore_t1 gse_totalscore_t2 gse_totalscore_t0

mi impute mvn tale_1_13_t0 tale_1_17_t0 cdss_totalscore_t0 bf_samvittigscore_t0 bf_neuroscore_t0 who5_total_t0 ///

Automatic_t0 tale_1_4_t0 tale_1_8_t0 gse_totalscore_t1 gse_totalscore_t2 gse_totalscore_t0 = gpts_b_delscore_t0 sbq_avoid_t0 demo_koen_t0 demo_studysite_t0, prior(jeffreys) add(100) by(RANDBLIND)

gen strat_gpts= gpts_b_delscore_t0>=45

gen RANDY=RANDBLIND=="Y"

log using "L:\LovbeskyttetMapper\Face your Fears\Carsten\gse_totalscore_t1",text replace

//WITHOUT ADJUSTMENT FOR BASELINE IMBALANCES

mi estimate, dots: regress gse_totalscore_t1 i.RANDY i.strat_gpts gse_totalscore_t0 i.demo_koen_t0 i.demo_studysite_t0

mimrgns i.RANDY

//WITH ADJUSTMENT FOR BASELINE IMBALANCES

mi estimate, dots: regress gse_totalscore_t1 i.RANDY i.strat_gpts gse_totalscore_t0 i.demo_koen_t0 i.demo_studysite_t0 Automatic_t0 tale_1_4_t0 tale_1_8_t0

mimrgns i.RANDY

log close

log using "L:\LovbeskyttetMapper\Face your Fears\Carsten\gse_totalscore_t1",text append

//WITHOUT ADJUSTMENT FOR BASELINE IMBALANCES

mi estimate, dots: regress gse_totalscore_t2 i.RANDY i.strat_gpts gse_totalscore_t0 i.demo_koen_t0 i.demo_studysite_t0

mimrgns i.RANDY

//WITH ADJUSTMENT FOR BASELINE IMBALANCES

mi estimate, dots: regress gse_totalscore_t2 i.RANDY i.strat_gpts gse_totalscore_t0 i.demo_koen_t0 i.demo_studysite_t0 Automatic_t0 tale_1_4_t0 tale_1_8_t0

mimrgns i.RANDY

log close

//Mixed model

mi reshape long gse_totalscore_t, i(trial number) j(time)

log using "L:\LovbeskyttetMapper\Face your Fears\Carsten\gse_totalscore_t1",text append

mi estimate,dots: mixed gse_totalscore_t i.RANDY##i.time i.strat_gpts i.demo_koen_t0 i.demo_studysite_t0 || trial number: , noconstant residuals(unstructured,t(time))

mi test 1.RANDY#2.time 1.RANDY#1.time

log close

//Next outcome: who5_total

frame change default

use "L:\LovbeskyttetMapper\Face your Fears\Carsten\Final uden randomisering\fyf_wide_for_analysis.dta" ,clear

cd c:\temp

set seed 11091404

keep tale_1_13_t0 tale_1_17_t0 cdss_totalscore_t0 gse_totalscore_t0 bf_samvittigscore_t0 bf_neuroscore_t0 who5_total_t0 ///

who5_total_t2 Automatic_t0 trial number tale_1_4_t0 tale_1_8_t0 who5_total_t1 who5_total_t0 gpts_b_delscore_t0 demo_koen_t0 demo_studysite_t0 RANDBLIND sbq_avoid_t0

mi set flong

destring who5_total*,replace dpcomma

mi register imputed tale_1_13_t0 tale_1_17_t0 cdss_totalscore_t0 gse_totalscore_t0 bf_samvittigscore_t0 bf_neuroscore_t0 who5_total_t0 ///

Automatic_t0 tale_1_4_t0 tale_1_8_t0 who5_total_t1 who5_total_t2

mi impute mvn tale_1_13_t0 tale_1_17_t0 cdss_totalscore_t0 gse_totalscore_t0 bf_samvittigscore_t0 bf_neuroscore_t0 who5_total_t0 ///

Automatic_t0 tale_1_4_t0 tale_1_8_t0 who5_total_t1 who5_total_t2 = gpts_b_delscore_t0 sbq_avoid_t0 demo_koen_t0 demo_studysite_t0, prior(jeffreys) add(100) by(RANDBLIND)

gen strat_gpts= gpts_b_delscore_t0>=45

gen RANDY=RANDBLIND=="Y"

log using "L:\LovbeskyttetMapper\Face your Fears\Carsten\who5_total_t1",text replace

//WITHOUT ADJUSTMENT FOR BASELINE IMBALANCES

mi estimate, dots: regress who5_total_t1 i.RANDY i.strat_gpts who5_total_t0 i.demo_koen_t0 i.demo_studysite_t0

mimrgns i.RANDY

//WITH ADJUSTMENT FOR BASELINE IMBALANCES

mi estimate, dots: regress who5_total_t1 i.RANDY i.strat_gpts who5_total_t0 i.demo_koen_t0 i.demo_studysite_t0 Automatic_t0 tale_1_4_t0 tale_1_8_t0

mimrgns i.RANDY

log close

log using "L:\LovbeskyttetMapper\Face your Fears\Carsten\who5_total_t1",text append

//WITHOUT ADJUSTMENT FOR BASELINE IMBALANCES

mi estimate, dots: regress who5_total_t2 i.RANDY i.strat_gpts who5_total_t0 i.demo_koen_t0 i.demo_studysite_t0

mimrgns i.RANDY

//WITH ADJUSTMENT FOR BASELINE IMBALANCES

mi estimate, dots: regress who5_total_t2 i.RANDY i.strat_gpts who5_total_t0 i.demo_koen_t0 i.demo_studysite_t0 Automatic_t0 tale_1_4_t0 tale_1_8_t0

mimrgns i.RANDY

log close

//Mixed model

mi reshape long who5_total_t, i(trial number) j(time)

log using "L:\LovbeskyttetMapper\Face your Fears\Carsten\who5_total_t1",text append

mi estimate,dots: mixed who5_total_t i.RANDY##i.time i.strat_gpts i.demo_koen_t0 i.demo_studysite_t0 || trial number: , noconstant residuals(unstructured,t(time))

mi test 1.RANDY#2.time 1.RANDY#1.time

log close

//Next outcome: gpts_r_b_delscore

frame change default

use "L:\LovbeskyttetMapper\Face your Fears\Carsten\Final uden randomisering\fyf_wide_for_analysis.dta" ,clear

cd c:\temp

set seed 11091408

keep tale_1_13_t0 tale_1_17_t0 cdss_totalscore_t0 gse_totalscore_t0 bf_samvittigscore_t0 bf_neuroscore_t0 who5_total_t0 ///

gpts_r_b_delscore_t2 Automatic_t0 trial number tale_1_4_t0 tale_1_8_t0 gpts_r_b_delscore_t1 gpts_r_b_delscore_t0 gpts_b_delscore_t0 demo_koen_t0 demo_studysite_t0 RANDBLIND sbq_avoid_t0

mi set flong

destring gpts_r_b_delscore*,replace dpcomma

mi register imputed tale_1_13_t0 tale_1_17_t0 cdss_totalscore_t0 gse_totalscore_t0 bf_samvittigscore_t0 bf_neuroscore_t0 who5_total_t0 ///

Automatic_t0 tale_1_4_t0 tale_1_8_t0 gpts_r_b_delscore_t1 gpts_r_b_delscore_t2 gpts_r_b_delscore_t0

mi impute mvn tale_1_13_t0 tale_1_17_t0 cdss_totalscore_t0 gse_totalscore_t0 bf_samvittigscore_t0 bf_neuroscore_t0 who5_total_t0 ///

Automatic_t0 tale_1_4_t0 tale_1_8_t0 gpts_r_b_delscore_t1 gpts_r_b_delscore_t2 gpts_r_b_delscore_t0 = gpts_b_delscore_t0 sbq_avoid_t0 demo_koen_t0 demo_studysite_t0, prior(jeffreys) add(100) by(RANDBLIND)

gen strat_gpts= gpts_b_delscore_t0>=45

gen RANDY=RANDBLIND=="Y"

log using "L:\LovbeskyttetMapper\Face your Fears\Carsten\gpts_r_b_delscore_t1",text replace

//WITHOUT ADJUSTMENT FOR BASELINE IMBALANCES

mi estimate, dots: regress gpts_r_b_delscore_t1 i.RANDY i.strat_gpts gpts_r_b_delscore_t0 i.demo_koen_t0 i.demo_studysite_t0

mimrgns i.RANDY

//WITH ADJUSTMENT FOR BASELINE IMBALANCES

mi estimate, dots: regress gpts_r_b_delscore_t1 i.RANDY i.strat_gpts gpts_r_b_delscore_t0 i.demo_koen_t0 i.demo_studysite_t0 Automatic_t0 tale_1_4_t0 tale_1_8_t0

mimrgns i.RANDY

log close

log using "L:\LovbeskyttetMapper\Face your Fears\Carsten\gpts_r_b_delscore_t1",text append

//WITHOUT ADJUSTMENT FOR BASELINE IMBALANCES

mi estimate, dots: regress gpts_r_b_delscore_t2 i.RANDY i.strat_gpts gpts_r_b_delscore_t0 i.demo_koen_t0 i.demo_studysite_t0

mimrgns i.RANDY

//WITH ADJUSTMENT FOR BASELINE IMBALANCES

mi estimate, dots: regress gpts_r_b_delscore_t2 i.RANDY i.strat_gpts gpts_r_b_delscore_t0 i.demo_koen_t0 i.demo_studysite_t0 Automatic_t0 tale_1_4_t0 tale_1_8_t0

mimrgns i.RANDY

log close

//Mixed model

mi reshape long gpts_r_b_delscore_t, i(trial number) j(time)

log using "L:\LovbeskyttetMapper\Face your Fears\Carsten\gpts_r_b_delscore_t1",text append

mi estimate,dots: mixed gpts_r_b_delscore_t i.RANDY##i.time i.strat_gpts i.demo_koen_t0 i.demo_studysite_t0 || trial number: , noconstant residuals(unstructured,t(time))

mi test 1.RANDY#2.time 1.RANDY#1.time

log close

//Next outcome: gpts_r_a_delscore

frame change default

use "L:\LovbeskyttetMapper\Face your Fears\Carsten\Final uden randomisering\fyf_wide_for_analysis.dta" ,clear

cd c:\temp

set seed 11091410

keep tale_1_13_t0 tale_1_17_t0 cdss_totalscore_t0 gse_totalscore_t0 bf_samvittigscore_t0 bf_neuroscore_t0 who5_total_t0 ///

gpts_r_a_delscore_t2 Automatic_t0 trial number tale_1_4_t0 tale_1_8_t0 gpts_r_a_delscore_t1 gpts_r_a_delscore_t0 gpts_b_delscore_t0 demo_koen_t0 demo_studysite_t0 RANDBLIND sbq_avoid_t0

mi set flong

mi register imputed tale_1_13_t0 tale_1_17_t0 cdss_totalscore_t0 gse_totalscore_t0 bf_samvittigscore_t0 bf_neuroscore_t0 who5_total_t0 ///

Automatic_t0 tale_1_4_t0 tale_1_8_t0 gpts_r_a_delscore_t1 gpts_r_a_delscore_t2 gpts_r_a_delscore_t0

mi impute mvn tale_1_13_t0 tale_1_17_t0 cdss_totalscore_t0 gse_totalscore_t0 bf_samvittigscore_t0 bf_neuroscore_t0 who5_total_t0 ///

Automatic_t0 tale_1_4_t0 tale_1_8_t0 gpts_r_a_delscore_t1 gpts_r_a_delscore_t2 gpts_r_a_delscore_t0 = gpts_b_delscore_t0 sbq_avoid_t0 demo_koen_t0 demo_studysite_t0, prior(jeffreys) add(100) by(RANDBLIND)

gen strat_gpts= gpts_b_delscore_t0>=45

gen RANDY=RANDBLIND=="Y"

log using "L:\LovbeskyttetMapper\Face your Fears\Carsten\gpts_r_a_delscore_t1",text replace

//WITHOUT ADJUSTMENT FOR BASELINE IMBALANCES

mi estimate, dots: regress gpts_r_a_delscore_t1 i.RANDY i.strat_gpts gpts_r_a_delscore_t0 i.demo_koen_t0 i.demo_studysite_t0

mimrgns i.RANDY

//WITH ADJUSTMENT FOR BASELINE IMBALANCES

mi estimate, dots: regress gpts_r_a_delscore_t1 i.RANDY i.strat_gpts gpts_r_a_delscore_t0 i.demo_koen_t0 i.demo_studysite_t0 Automatic_t0 tale_1_4_t0 tale_1_8_t0

mimrgns i.RANDY

log close

log using "L:\LovbeskyttetMapper\Face your Fears\Carsten\gpts_r_a_delscore_t1",text append

//WITHOUT ADJUSTMENT FOR BASELINE IMBALANCES

mi estimate, dots: regress gpts_r_a_delscore_t2 i.RANDY i.strat_gpts gpts_r_a_delscore_t0 i.demo_koen_t0 i.demo_studysite_t0

mimrgns i.RANDY

//WITH ADJUSTMENT FOR BASELINE IMBALANCES

mi estimate, dots: regress gpts_r_a_delscore_t2 i.RANDY i.strat_gpts gpts_r_a_delscore_t0 i.demo_koen_t0 i.demo_studysite_t0 Automatic_t0 tale_1_4_t0 tale_1_8_t0

mimrgns i.RANDY

log close

//Mixed model

mi reshape long gpts_r_a_delscore_t, i(trial number) j(time)

log using "L:\LovbeskyttetMapper\Face your Fears\Carsten\gpts_r_a_delscore_t1",text append

mi estimate,dots: mixed gpts_r_a_delscore_t i.RANDY##i.time i.strat_gpts i.demo_koen_t0 i.demo_studysite_t0 || trial number: , noconstant residuals(unstructured,t(time))

mi test 1.RANDY#2.time 1.RANDY#1.time

log close

//Next outcome: gpts_r_totalscore

frame change default

use "L:\LovbeskyttetMapper\Face your Fears\Carsten\Final uden randomisering\fyf_wide_for_analysis.dta" ,clear

cd c:\temp

set seed 11091413

keep tale_1_13_t0 tale_1_17_t0 cdss_totalscore_t0 gse_totalscore_t0 bf_samvittigscore_t0 bf_neuroscore_t0 who5_total_t0 ///

gpts_r_totalscore_t2 Automatic_t0 trial number tale_1_4_t0 tale_1_8_t0 gpts_r_totalscore_t1 gpts_r_totalscore_t0 gpts_b_delscore_t0 demo_koen_t0 demo_studysite_t0 RANDBLIND sbq_avoid_t0

mi set flong

mi register imputed tale_1_13_t0 tale_1_17_t0 cdss_totalscore_t0 gse_totalscore_t0 bf_samvittigscore_t0 bf_neuroscore_t0 who5_total_t0 ///

Automatic_t0 tale_1_4_t0 tale_1_8_t0 gpts_r_totalscore_t1 gpts_r_totalscore_t2 gpts_r_totalscore_t0

mi impute mvn tale_1_13_t0 tale_1_17_t0 cdss_totalscore_t0 gse_totalscore_t0 bf_samvittigscore_t0 bf_neuroscore_t0 who5_total_t0 ///

Automatic_t0 tale_1_4_t0 tale_1_8_t0 gpts_r_totalscore_t1 gpts_r_totalscore_t2 gpts_r_totalscore_t0 = gpts_b_delscore_t0 sbq_avoid_t0 demo_koen_t0 demo_studysite_t0, prior(jeffreys) add(100) by(RANDBLIND)

gen strat_gpts= gpts_b_delscore_t0>=45

gen RANDY=RANDBLIND=="Y"

log using "L:\LovbeskyttetMapper\Face your Fears\Carsten\gpts_r_totalscore_t1",text replace

//WITHOUT ADJUSTMENT FOR BASELINE IMBALANCES

mi estimate, dots: regress gpts_r_totalscore_t1 i.RANDY i.strat_gpts gpts_r_totalscore_t0 i.demo_koen_t0 i.demo_studysite_t0

mimrgns i.RANDY

//WITH ADJUSTMENT FOR BASELINE IMBALANCES

mi estimate, dots: regress gpts_r_totalscore_t1 i.RANDY i.strat_gpts gpts_r_totalscore_t0 i.demo_koen_t0 i.demo_studysite_t0 Automatic_t0 tale_1_4_t0 tale_1_8_t0

mimrgns i.RANDY

log close

log using "L:\LovbeskyttetMapper\Face your Fears\Carsten\gpts_r_totalscore_t1",text append

//WITHOUT ADJUSTMENT FOR BASELINE IMBALANCES

mi estimate, dots: regress gpts_r_totalscore_t2 i.RANDY i.strat_gpts gpts_r_totalscore_t0 i.demo_koen_t0 i.demo_studysite_t0

mimrgns i.RANDY

//WITH ADJUSTMENT FOR BASELINE IMBALANCES

mi estimate, dots: regress gpts_r_totalscore_t2 i.RANDY i.strat_gpts gpts_r_totalscore_t0 i.demo_koen_t0 i.demo_studysite_t0 Automatic_t0 tale_1_4_t0 tale_1_8_t0

mimrgns i.RANDY

log close

//Mixed model

mi reshape long gpts_r_totalscore_t, i(trial number) j(time)

log using "L:\LovbeskyttetMapper\Face your Fears\Carsten\gpts_r_totalscore_t1",text append

mi estimate,dots: mixed gpts_r_totalscore_t i.RANDY##i.time i.strat_gpts i.demo_koen_t0 i.demo_studysite_t0 || trial number: , noconstant residuals(unstructured,t(time))

mi test 1.RANDY#2.time 1.RANDY#1.time

log close

//Next outcome: gpts_totalscore

frame change default

use "L:\LovbeskyttetMapper\Face your Fears\Carsten\Final uden randomisering\fyf_wide_for_analysis.dta" ,clear

cd c:\temp

set seed 11091415

keep tale_1_13_t0 tale_1_17_t0 cdss_totalscore_t0 gse_totalscore_t0 bf_samvittigscore_t0 bf_neuroscore_t0 who5_total_t0 ///

gpts_totalscore_t2 Automatic_t0 trial number tale_1_4_t0 tale_1_8_t0 gpts_totalscore_t1 gpts_totalscore_t0 gpts_b_delscore_t0 demo_koen_t0 demo_studysite_t0 RANDBLIND sbq_avoid_t0

mi set flong

mi register imputed tale_1_13_t0 tale_1_17_t0 cdss_totalscore_t0 gse_totalscore_t0 bf_samvittigscore_t0 bf_neuroscore_t0 who5_total_t0 ///

Automatic_t0 tale_1_4_t0 tale_1_8_t0 gpts_totalscore_t1 gpts_totalscore_t2 gpts_totalscore_t0

mi impute mvn tale_1_13_t0 tale_1_17_t0 cdss_totalscore_t0 gse_totalscore_t0 bf_samvittigscore_t0 bf_neuroscore_t0 who5_total_t0 ///

Automatic_t0 tale_1_4_t0 tale_1_8_t0 gpts_totalscore_t1 gpts_totalscore_t2 gpts_totalscore_t0 = gpts_b_delscore_t0 sbq_avoid_t0 demo_koen_t0 demo_studysite_t0, prior(jeffreys) add(100) by(RANDBLIND)

gen strat_gpts= gpts_b_delscore_t0>=45

gen RANDY=RANDBLIND=="Y"

log using "L:\LovbeskyttetMapper\Face your Fears\Carsten\gpts_totalscore_t1",text replace

//WITHOUT ADJUSTMENT FOR BASELINE IMBALANCES

mi estimate, dots: regress gpts_totalscore_t1 i.RANDY i.strat_gpts gpts_totalscore_t0 i.demo_koen_t0 i.demo_studysite_t0

mimrgns i.RANDY

//WITH ADJUSTMENT FOR BASELINE IMBALANCES

mi estimate, dots: regress gpts_totalscore_t1 i.RANDY i.strat_gpts gpts_totalscore_t0 i.demo_koen_t0 i.demo_studysite_t0 Automatic_t0 tale_1_4_t0 tale_1_8_t0

mimrgns i.RANDY

log close

log using "L:\LovbeskyttetMapper\Face your Fears\Carsten\gpts_totalscore_t1",text append

//WITHOUT ADJUSTMENT FOR BASELINE IMBALANCES

mi estimate, dots: regress gpts_totalscore_t2 i.RANDY i.strat_gpts gpts_totalscore_t0 i.demo_koen_t0 i.demo_studysite_t0

mimrgns i.RANDY

//WITH ADJUSTMENT FOR BASELINE IMBALANCES

mi estimate, dots: regress gpts_totalscore_t2 i.RANDY i.strat_gpts gpts_totalscore_t0 i.demo_koen_t0 i.demo_studysite_t0 Automatic_t0 tale_1_4_t0 tale_1_8_t0

mimrgns i.RANDY

log close

//Mixed model

mi reshape long gpts_totalscore_t, i(trial number) j(time)

log using "L:\LovbeskyttetMapper\Face your Fears\Carsten\gpts_totalscore_t1",text append

mi estimate,dots: mixed gpts_totalscore_t i.RANDY##i.time i.strat_gpts i.demo_koen_t0 i.demo_studysite_t0 || trial number: , noconstant residuals(unstructured,t(time))

mi test 1.RANDY#2.time 1.RANDY#1.time

log close

//Konfidensintervaller på skalaer ved baseline

use "L:\LovbeskyttetMapper\Face your Fears\Carsten\Final uden randomisering\fyf_wide_for_analysis.dta" ,clear

gen RANDY=RANDBLIND=="Y"

ttest alderkomma,by(RANDY)

ttest olanzapin_t0,by(RANDY)

recode cogdis*hyp* (8=1) (7=0) (9=0)

drop cogdis_t0

egen fc_0=rownonmiss(cogdis*hyp*t0)

egen fc_1=rownonmiss(cogdis*hyp*t1)

egen fc_2=rownonmiss(cogdis*hyp*t2)

egen cogdis_t0=rowtotal(cogdis*hyp*t0) if fc_0==9

egen cogdis_t1=rowtotal(cogdis*hyp*t1) if fc_1==9

egen cogdis_t2=rowtotal(cogdis*hyp*t2) if fc_2==9

log using baseline_ci,text replace

foreach g of varlist gpts_b_delscore_t0 gpts_a_delscore_t0 psp_total_t0 sbq_total_score_t0 sbq_avoid_t0 sias_totalscore_t0 saps_composite_total_t0 saps_samletglobal_t0 ///

bnss_total_t0 cdss_totalscore_t0 cogdis_t0 trust_average_all_faces_t0 sspa_scopetotal_t0 f_andel_t0 Automatic_t0 Control_t0 sidas_samletscore_t0 ///

bcss_delscore_migneg_t0 bcss_delscore_migpos_t0 bcss_delscore_andremenneg_t0 bcss_delscore_andremenpos_t0 dacobs_jtc_delscore_t0 dacobs_inflex_delscore_t0 ///

dacobs_threat_delscore_t0 dacobs_extattrib_delscore_t0 dacobs_soccog_delscore_t0 dacobs_subcog_delscore_t0 dacobs_safebeh_delscore_t0 sfs_soc_tilb_skaleret_t0 ///

sfs_int_skaleret_t0 sfs_rekr_skaleret_t0 sfs_komp_skaleret_t0 sfs_uaf_skaleret_t0 sfs_job_skaleret_t0 gse_totalscore_t0 who5_total_t0 gpts_r_b_delscore_t0 ///

gpts_r_a_delscore_t0 gpts_r_totalscore_t0 gpts_totalscore_t0{

mean `g', over(RANDY)

}

log close

log using antipsyk_baseline,text replace

tab med_antipsykotisk_t0 RANDBLIND,col chi

forvalues g=1/15{

tab med_indholdsstof___`g'_t0 RANDBLIND,col chi

}

log close

//Next outcome: olanzapin

frame change default

use "L:\LovbeskyttetMapper\Face your Fears\Carsten\Final uden randomisering\fyf_wide_for_analysis.dta" ,clear

destring olanzapin*,dpcomma replace

cd c:\temp

set seed 18091125

keep tale_1_13_t0 tale_1_17_t0 cdss_totalscore_t0 gse_totalscore_t0 bf_samvittigscore_t0 bf_neuroscore_t0 who5_total_t0 ///

olanzapin_t2 Automatic_t0 trial number tale_1_4_t0 tale_1_8_t0 olanzapin_t1 olanzapin_t0 gpts_b_delscore_t0 demo_koen_t0 demo_studysite_t0 RANDBLIND sbq_avoid_t0

mi set flong

mi register imputed tale_1_13_t0 tale_1_17_t0 cdss_totalscore_t0 gse_totalscore_t0 bf_samvittigscore_t0 bf_neuroscore_t0 who5_total_t0 ///

Automatic_t0 tale_1_4_t0 tale_1_8_t0 olanzapin_t1 olanzapin_t2 olanzapin_t0

mi impute mvn tale_1_13_t0 tale_1_17_t0 cdss_totalscore_t0 gse_totalscore_t0 bf_samvittigscore_t0 bf_neuroscore_t0 who5_total_t0 ///

Automatic_t0 tale_1_4_t0 tale_1_8_t0 olanzapin_t1 olanzapin_t2 olanzapin_t0 = gpts_b_delscore_t0 sbq_avoid_t0 demo_koen_t0 demo_studysite_t0, prior(jeffreys) add(100) by(RANDBLIND)

gen strat_gpts= gpts_b_delscore_t0>=45

gen RANDY=RANDBLIND=="Y"

log using "L:\LovbeskyttetMapper\Face your Fears\Carsten\olanzapin_t1",text replace

//WITHOUT ADJUSTMENT FOR BASELINE IMBALANCES

mi estimate, dots: regress olanzapin_t1 i.RANDY i.strat_gpts olanzapin_t0 i.demo_koen_t0 i.demo_studysite_t0

mimrgns i.RANDY

//WITH ADJUSTMENT FOR BASELINE IMBALANCES

mi estimate, dots: regress olanzapin_t1 i.RANDY i.strat_gpts olanzapin_t0 i.demo_koen_t0 i.demo_studysite_t0 Automatic_t0 tale_1_4_t0 tale_1_8_t0

mimrgns i.RANDY

log close

log using "L:\LovbeskyttetMapper\Face your Fears\Carsten\olanzapin_t1",text append

//WITHOUT ADJUSTMENT FOR BASELINE IMBALANCES

mi estimate, dots: regress olanzapin_t2 i.RANDY i.strat_gpts olanzapin_t0 i.demo_koen_t0 i.demo_studysite_t0

mimrgns i.RANDY

//WITH ADJUSTMENT FOR BASELINE IMBALANCES

mi estimate, dots: regress olanzapin_t2 i.RANDY i.strat_gpts olanzapin_t0 i.demo_koen_t0 i.demo_studysite_t0 Automatic_t0 tale_1_4_t0 tale_1_8_t0

mimrgns i.RANDY

log close

//Mixed model

mi reshape long olanzapin_t, i(trial number) j(time)

log using "L:\LovbeskyttetMapper\Face your Fears\Carsten\olanzapin_t1",text append

mi estimate,dots: mixed olanzapin_t i.RANDY##i.time i.strat_gpts i.demo_koen_t0 i.demo_studysite_t0 || trial number: , noconstant residuals(unstructured,t(time))

mi test 1.RANDY#2.time 1.RANDY#1.time

log close

//Next outcome: EQ5

frame change default

use "L:\LovbeskyttetMapper\Face your Fears\Carsten\Final uden randomisering\fyf_wide_for_analysis.dta" ,clear

forvalues g=0/2{

egen eqnonmiss_t`g'=rownonmiss(eq_5_bev_t`g'-eq_5_ang_t`g')

gen eq5d_t`g'=1 if eqnonmiss_t`g'==5

replace eq5d_t`g'=eq5d_t`g'-0.041 if eq_5_bev_t`g'==2

replace eq5d_t`g'=eq5d_t`g'-0.054 if eq_5_bev_t`g'==3

replace eq5d_t`g'=eq5d_t`g'-0.157 if eq_5_bev_t`g'==4

replace eq5d_t`g'=eq5d_t`g'-0.220 if eq_5_bev_t`g'==5

replace eq5d_t`g'=eq5d_t`g'-0.035 if eq_5_pers_t`g'==2

replace eq5d_t`g'=eq5d_t`g'-0.050 if eq_5_pers_t`g'==3

replace eq5d_t`g'=eq5d_t`g'-0.144 if eq_5_pers_t`g'==4

replace eq5d_t`g'=eq5d_t`g'-0.209 if eq_5_pers_t`g'==5

replace eq5d_t`g'=eq5d_t`g'-0.033 if eq_5_saed_t`g'==2

replace eq5d_t`g'=eq5d_t`g'-0.040 if eq_5_saed_t`g'==3

replace eq5d_t`g'=eq5d_t`g'-0.139 if eq_5_saed_t`g'==4

replace eq5d_t`g'=eq5d_t`g'-0.174 if eq_5_saed_t`g'==5

replace eq5d_t`g'=eq5d_t`g'-0.048 if eq_5_smer_t`g'==2

replace eq5d_t`g'=eq5d_t`g'-0.094 if eq_5_smer_t`g'==3

replace eq5d_t`g'=eq5d_t`g'-0.381 if eq_5_smer_t`g'==4

replace eq5d_t`g'=eq5d_t`g'-0.537 if eq_5_smer_t`g'==5

replace eq5d_t`g'=eq5d_t`g'-0.072 if eq_5_ang_t`g'==2

replace eq5d_t`g'=eq5d_t`g'-0.191 if eq_5_ang_t`g'==3

replace eq5d_t`g'=eq5d_t`g'-0.430 if eq_5_ang_t`g'==4

replace eq5d_t`g'=eq5d_t`g'-0.618 if eq_5_ang_t`g'==5

}

cd c:\temp

set seed 18091238

keep tale_1_13_t0 tale_1_17_t0 cdss_totalscore_t0 gse_totalscore_t0 bf_samvittigscore_t0 bf_neuroscore_t0 who5_total_t0 ///

eq5d_t2 Automatic_t0 trial number tale_1_4_t0 tale_1_8_t0 eq5d_t1 eq5d_t0 gpts_b_delscore_t0 demo_koen_t0 demo_studysite_t0 RANDBLIND sbq_avoid_t0

mi set flong

mi register imputed tale_1_13_t0 tale_1_17_t0 cdss_totalscore_t0 gse_totalscore_t0 bf_samvittigscore_t0 bf_neuroscore_t0 who5_total_t0 ///

Automatic_t0 tale_1_4_t0 tale_1_8_t0 eq5d_t1 eq5d_t2 eq5d_t0

mi impute mvn tale_1_13_t0 tale_1_17_t0 cdss_totalscore_t0 gse_totalscore_t0 bf_samvittigscore_t0 bf_neuroscore_t0 who5_total_t0 ///

Automatic_t0 tale_1_4_t0 tale_1_8_t0 eq5d_t1 eq5d_t2 eq5d_t0 = gpts_b_delscore_t0 sbq_avoid_t0 demo_koen_t0 demo_studysite_t0, prior(jeffreys) add(100) by(RANDBLIND)

gen strat_gpts= gpts_b_delscore_t0>=45

gen RANDY=RANDBLIND=="Y"

log using "L:\LovbeskyttetMapper\Face your Fears\Carsten\eq5d_t1",text replace

//WITHOUT ADJUSTMENT FOR BASELINE IMBALANCES

mi estimate, dots: regress eq5d_t1 i.RANDY i.strat_gpts eq5d_t0 i.demo_koen_t0 i.demo_studysite_t0

mimrgns i.RANDY

//WITH ADJUSTMENT FOR BASELINE IMBALANCES

mi estimate, dots: regress eq5d_t1 i.RANDY i.strat_gpts eq5d_t0 i.demo_koen_t0 i.demo_studysite_t0 Automatic_t0 tale_1_4_t0 tale_1_8_t0

mimrgns i.RANDY

log close

log using "L:\LovbeskyttetMapper\Face your Fears\Carsten\eq5d_t1",text append

//WITHOUT ADJUSTMENT FOR BASELINE IMBALANCES

mi estimate, dots: regress eq5d_t2 i.RANDY i.strat_gpts eq5d_t0 i.demo_koen_t0 i.demo_studysite_t0

mimrgns i.RANDY

//WITH ADJUSTMENT FOR BASELINE IMBALANCES

mi estimate, dots: regress eq5d_t2 i.RANDY i.strat_gpts eq5d_t0 i.demo_koen_t0 i.demo_studysite_t0 Automatic_t0 tale_1_4_t0 tale_1_8_t0

mimrgns i.RANDY

log close

//Mixed model

mi reshape long eq5d_t, i(trial number) j(time)

log using "L:\LovbeskyttetMapper\Face your Fears\Carsten\eq5d_t1",text append

mi estimate,dots: mixed eq5d_t i.RANDY##i.time i.strat_gpts i.demo_koen_t0 i.demo_studysite_t0 || trial number: , noconstant residuals(unstructured,t(time))

mi test 1.RANDY#2.time 1.RANDY#1.time

log close

//Next outcome: EQ5 SRH (VAS)

frame change default

use "L:\LovbeskyttetMapper\Face your Fears\Carsten\Final uden randomisering\fyf_wide_for_analysis.dta" ,clear

cd c:\temp

set seed 18091242

keep tale_1_13_t0 tale_1_17_t0 cdss_totalscore_t0 gse_totalscore_t0 bf_samvittigscore_t0 bf_neuroscore_t0 who5_total_t0 ///

eq_5_v_a_s_t2 Automatic_t0 trial number tale_1_4_t0 tale_1_8_t0 eq_5_v_a_s_t1 eq_5_v_a_s_t0 gpts_b_delscore_t0 demo_koen_t0 demo_studysite_t0 RANDBLIND sbq_avoid_t0

mi set flong

mi register imputed tale_1_13_t0 tale_1_17_t0 cdss_totalscore_t0 gse_totalscore_t0 bf_samvittigscore_t0 bf_neuroscore_t0 who5_total_t0 ///

Automatic_t0 tale_1_4_t0 tale_1_8_t0 eq_5_v_a_s_t1 eq_5_v_a_s_t2 eq_5_v_a_s_t0

mi impute mvn tale_1_13_t0 tale_1_17_t0 cdss_totalscore_t0 gse_totalscore_t0 bf_samvittigscore_t0 bf_neuroscore_t0 who5_total_t0 ///

Automatic_t0 tale_1_4_t0 tale_1_8_t0 eq_5_v_a_s_t1 eq_5_v_a_s_t2 eq_5_v_a_s_t0 = gpts_b_delscore_t0 sbq_avoid_t0 demo_koen_t0 demo_studysite_t0, prior(jeffreys) add(100) by(RANDBLIND)

gen strat_gpts= gpts_b_delscore_t0>=45

gen RANDY=RANDBLIND=="Y"

log using "L:\LovbeskyttetMapper\Face your Fears\Carsten\eq_5_v_a_s_t1",text replace

//WITHOUT ADJUSTMENT FOR BASELINE IMBALANCES

mi estimate, dots: regress eq_5_v_a_s_t1 i.RANDY i.strat_gpts eq_5_v_a_s_t0 i.demo_koen_t0 i.demo_studysite_t0

mimrgns i.RANDY

//WITH ADJUSTMENT FOR BASELINE IMBALANCES

mi estimate, dots: regress eq_5_v_a_s_t1 i.RANDY i.strat_gpts eq_5_v_a_s_t0 i.demo_koen_t0 i.demo_studysite_t0 Automatic_t0 tale_1_4_t0 tale_1_8_t0

mimrgns i.RANDY

log close

log using "L:\LovbeskyttetMapper\Face your Fears\Carsten\eq_5_v_a_s_t1",text append

//WITHOUT ADJUSTMENT FOR BASELINE IMBALANCES

mi estimate, dots: regress eq_5_v_a_s_t2 i.RANDY i.strat_gpts eq_5_v_a_s_t0 i.demo_koen_t0 i.demo_studysite_t0

mimrgns i.RANDY

//WITH ADJUSTMENT FOR BASELINE IMBALANCES

mi estimate, dots: regress eq_5_v_a_s_t2 i.RANDY i.strat_gpts eq_5_v_a_s_t0 i.demo_koen_t0 i.demo_studysite_t0 Automatic_t0 tale_1_4_t0 tale_1_8_t0

mimrgns i.RANDY

log close

//Mixed model

mi reshape long eq_5_v_a_s_t, i(trial number) j(time)

log using "L:\LovbeskyttetMapper\Face your Fears\Carsten\eq_5_v_a_s_t1",text append

mi estimate,dots: mixed eq_5_v_a_s_t i.RANDY##i.time i.strat_gpts i.demo_koen_t0 i.demo_studysite_t0 || trial number: , noconstant residuals(unstructured,t(time))

mi test 1.RANDY#2.time 1.RANDY#1.time

log close

//Sideløbende interventioner

frame change default

use "L:\LovbeskyttetMapper\Face your Fears\Carsten\Final uden randomisering\fyf_wide_for_analysis.dta" ,clear

egen anden_terapi_t1=rowtotal(journal_anden_terapi_9*t2)

egen anden_terapi_t2=rowtotal(journal_anden_terapi_3*t2)

recode anden_terapi* (1/4=1)

log using "L:\LovbeskyttetMapper\Face your Fears\Carsten\anden_terapi",replace text

foreach g of varlist journal_anden_terapi*t2 anden_terapi*{

tab `g' RANDBLIND, col chi

}

log close

//Indlæggelser

log using "L:\LovbeskyttetMapper\Face your Fears\Carsten\indl_dage",text replace

ttest journal_base_3_indl_dage_t2,by(RANDBLIND)

ttest journal_3_9_indl_dage_t2,by(RANDBLIND)

log close

recode journal_base_3_indl_dage_t2 0=0 .=. else=1 ,gen(indl_atall_post)

recode journal_3_9_indl_dage_t2 0=0 .=. else=1 ,gen(indl_atall_followup)

log using "L:\LovbeskyttetMapper\Face your Fears\Carsten\indl_atall",text replace

tab indl_atall_post RANDBLIND, col chi

tab indl_atall_followup RANDBLIND, col chi

log close

log using "L:\LovbeskyttetMapper\Face your Fears\Carsten\selvmordsforsoeg",text replace

tab journal_selvmf_3mdr_t2 RANDBLIND, col chi

log close

log using "L:\LovbeskyttetMapper\Face your Fears\Carsten\selvmordsforsoeg",text replace

tab journal_selvmf_9mdr_t2 RANDBLIND, col chi

log close

log using "L:\LovbeskyttetMapper\Face your Fears\Carsten\afsl_egen_laege",text replace

tab journal_egen_laege_t2 RANDBLIND,col chi

log close

//CANTAB ting

//Indlæs CANTAB i ny frame

capture noisily frame create cantab

frame change cantab

import delimited using "l:\LovbeskyttetMapper\Face your Fears\CANTAB\CANTAB ERT-data FaceYourFears - completed trial\RowBySession_Face your Fears (1) FIXED.txt",clear delimiter(",")

drop if ertlong=="NOT_RUN"

keep newsubjectime visitstartlocal ert* visitimeentifier

drop ertlong

drop in 465

drop in 464

drop in 328

reshape wide ert* visitstartlocal,i(newsubjectime) j(visitimeentifier) string

//Gem den lige til senere

compress

keep if newsubjectime>1000 & newsubjectime<2000

gen trial number=newsubjectime-1000

ren *V1 *V0

ren *V2 *V1

ren *V3 *V2

save cantab_wide,replace

//Next outcome: ERTRT

frame change default

use "L:\LovbeskyttetMapper\Face your Fears\Carsten\Final uden randomisering\fyf_wide_for_analysis.dta" ,clear

frlink 1:1 trial number, frame(cantab)

frget ertrt*,from(cantab)

cd c:\temp

set seed 30092106

keep tale_1_13_t0 tale_1_17_t0 cdss_totalscore_t0 gse_totalscore_t0 bf_samvittigscore_t0 bf_neuroscore_t0 who5_total_t0 ///

ertrtV2 Automatic_t0 trial number tale_1_4_t0 tale_1_8_t0 ertrtV1 ertrtV0 gpts_b_delscore_t0 demo_koen_t0 demo_studysite_t0 RANDBLIND sbq_avoid_t0

mi set flong

mi register imputed tale_1_13_t0 tale_1_17_t0 cdss_totalscore_t0 gse_totalscore_t0 bf_samvittigscore_t0 bf_neuroscore_t0 who5_total_t0 ///

Automatic_t0 tale_1_4_t0 tale_1_8_t0 ertrtV1 ertrtV2 ertrtV0

mi impute mvn tale_1_13_t0 tale_1_17_t0 cdss_totalscore_t0 gse_totalscore_t0 bf_samvittigscore_t0 bf_neuroscore_t0 who5_total_t0 ///

Automatic_t0 tale_1_4_t0 tale_1_8_t0 ertrtV1 ertrtV2 ertrtV0 = gpts_b_delscore_t0 sbq_avoid_t0 demo_koen_t0 demo_studysite_t0, prior(jeffreys) add(100) by(RANDBLIND)

gen strat_gpts= gpts_b_delscore_t0>=45

gen RANDY=RANDBLIND=="Y"

log using "L:\LovbeskyttetMapper\Face your Fears\Carsten\ertrtV1",text replace

//WITHOUT ADJUSTMENT FOR BASELINE IMBALANCES

mi estimate, dots: regress ertrtV1 i.RANDY i.strat_gpts ertrtV0 i.demo_koen_t0 i.demo_studysite_t0

mimrgns i.RANDY

//WITH ADJUSTMENT FOR BASELINE IMBALANCES

mi estimate, dots: regress ertrtV1 i.RANDY i.strat_gpts ertrtV0 i.demo_koen_t0 i.demo_studysite_t0 Automatic_t0 tale_1_4_t0 tale_1_8_t0

mimrgns i.RANDY

log close

log using "L:\LovbeskyttetMapper\Face your Fears\Carsten\ertrtV1",text append

//WITHOUT ADJUSTMENT FOR BASELINE IMBALANCES

mi estimate, dots: regress ertrtV2 i.RANDY i.strat_gpts ertrtV0 i.demo_koen_t0 i.demo_studysite_t0

mimrgns i.RANDY

//WITH ADJUSTMENT FOR BASELINE IMBALANCES

mi estimate, dots: regress ertrtV2 i.RANDY i.strat_gpts ertrtV0 i.demo_koen_t0 i.demo_studysite_t0 Automatic_t0 tale_1_4_t0 tale_1_8_t0

mimrgns i.RANDY

log close

//Mixed model

mi reshape long ertrtV, i(trial number) j(time)

log using "L:\LovbeskyttetMapper\Face your Fears\Carsten\ertrtV1",text append

mi estimate,dots: mixed ertrtV i.RANDY##i.time i.strat_gpts i.demo_koen_t0 i.demo_studysite_t0 || trial number: , noconstant residuals(unstructured,t(time))

mi test 1.RANDY#2.time 1.RANDY#1.time

log close

//Next outcome: ertrth (ERT latency happiness)

frame change default

use "L:\LovbeskyttetMapper\Face your Fears\Carsten\Final uden randomisering\fyf_wide_for_analysis.dta" ,clear

frlink 1:1 trial number, frame(cantab)

frget ertrth*,from(cantab)

cd c:\temp

set seed 30092111

keep tale_1_13_t0 tale_1_17_t0 cdss_totalscore_t0 gse_totalscore_t0 bf_samvittigscore_t0 bf_neuroscore_t0 who5_total_t0 ///

ertrthV2 Automatic_t0 trial number tale_1_4_t0 tale_1_8_t0 ertrthV1 ertrthV0 gpts_b_delscore_t0 demo_koen_t0 demo_studysite_t0 RANDBLIND sbq_avoid_t0

mi set flong

mi register imputed tale_1_13_t0 tale_1_17_t0 cdss_totalscore_t0 gse_totalscore_t0 bf_samvittigscore_t0 bf_neuroscore_t0 who5_total_t0 ///

Automatic_t0 tale_1_4_t0 tale_1_8_t0 ertrthV1 ertrthV2 ertrthV0

mi impute mvn tale_1_13_t0 tale_1_17_t0 cdss_totalscore_t0 gse_totalscore_t0 bf_samvittigscore_t0 bf_neuroscore_t0 who5_total_t0 ///

Automatic_t0 tale_1_4_t0 tale_1_8_t0 ertrthV1 ertrthV2 ertrthV0 = gpts_b_delscore_t0 sbq_avoid_t0 demo_koen_t0 demo_studysite_t0, prior(jeffreys) add(100) by(RANDBLIND)

gen strat_gpts= gpts_b_delscore_t0>=45

gen RANDY=RANDBLIND=="Y"

log using "L:\LovbeskyttetMapper\Face your Fears\Carsten\ertrthV1",text replace

//WITHOUT ADJUSTMENT FOR BASELINE IMBALANCES

mi estimate, dots: regress ertrthV1 i.RANDY i.strat_gpts ertrthV0 i.demo_koen_t0 i.demo_studysite_t0

mimrgns i.RANDY

//WITH ADJUSTMENT FOR BASELINE IMBALANCES

mi estimate, dots: regress ertrthV1 i.RANDY i.strat_gpts ertrthV0 i.demo_koen_t0 i.demo_studysite_t0 Automatic_t0 tale_1_4_t0 tale_1_8_t0

mimrgns i.RANDY

log close

log using "L:\LovbeskyttetMapper\Face your Fears\Carsten\ertrthV1",text append

//WITHOUT ADJUSTMENT FOR BASELINE IMBALANCES

mi estimate, dots: regress ertrthV2 i.RANDY i.strat_gpts ertrthV0 i.demo_koen_t0 i.demo_studysite_t0

mimrgns i.RANDY

//WITH ADJUSTMENT FOR BASELINE IMBALANCES

mi estimate, dots: regress ertrthV2 i.RANDY i.strat_gpts ertrthV0 i.demo_koen_t0 i.demo_studysite_t0 Automatic_t0 tale_1_4_t0 tale_1_8_t0

mimrgns i.RANDY

log close

//Mixed model

mi reshape long ertrthV, i(trial number) j(time)

log using "L:\LovbeskyttetMapper\Face your Fears\Carsten\ertrthV1",text append

mi estimate,dots: mixed ertrthV i.RANDY##i.time i.strat_gpts i.demo_koen_t0 i.demo_studysite_t0 || trial number: , noconstant residuals(unstructured,t(time))

mi test 1.RANDY#2.time 1.RANDY#1.time

log close

//Next outcome: ertrts (ERT latency sadness)

frame change default

use "L:\LovbeskyttetMapper\Face your Fears\Carsten\Final uden randomisering\fyf_wide_for_analysis.dta" ,clear

frlink 1:1 trial number, frame(cantab)

frget ertrts*,from(cantab)

cd c:\temp

set seed 30092114

keep tale_1_13_t0 tale_1_17_t0 cdss_totalscore_t0 gse_totalscore_t0 bf_samvittigscore_t0 bf_neuroscore_t0 who5_total_t0 ///

ertrtsV2 Automatic_t0 trial number tale_1_4_t0 tale_1_8_t0 ertrtsV1 ertrtsV0 gpts_b_delscore_t0 demo_koen_t0 demo_studysite_t0 RANDBLIND sbq_avoid_t0

mi set flong

mi register imputed tale_1_13_t0 tale_1_17_t0 cdss_totalscore_t0 gse_totalscore_t0 bf_samvittigscore_t0 bf_neuroscore_t0 who5_total_t0 ///

Automatic_t0 tale_1_4_t0 tale_1_8_t0 ertrtsV1 ertrtsV2 ertrtsV0

mi impute mvn tale_1_13_t0 tale_1_17_t0 cdss_totalscore_t0 gse_totalscore_t0 bf_samvittigscore_t0 bf_neuroscore_t0 who5_total_t0 ///

Automatic_t0 tale_1_4_t0 tale_1_8_t0 ertrtsV1 ertrtsV2 ertrtsV0 = gpts_b_delscore_t0 sbq_avoid_t0 demo_koen_t0 demo_studysite_t0, prior(jeffreys) add(100) by(RANDBLIND)

gen strat_gpts= gpts_b_delscore_t0>=45

gen RANDY=RANDBLIND=="Y"

log using "L:\LovbeskyttetMapper\Face your Fears\Carsten\ertrtsV1",text replace

//WITHOUT ADJUSTMENT FOR BASELINE IMBALANCES

mi estimate, dots: regress ertrtsV1 i.RANDY i.strat_gpts ertrtsV0 i.demo_koen_t0 i.demo_studysite_t0

mimrgns i.RANDY

//WITH ADJUSTMENT FOR BASELINE IMBALANCES

mi estimate, dots: regress ertrtsV1 i.RANDY i.strat_gpts ertrtsV0 i.demo_koen_t0 i.demo_studysite_t0 Automatic_t0 tale_1_4_t0 tale_1_8_t0

mimrgns i.RANDY

log close

log using "L:\LovbeskyttetMapper\Face your Fears\Carsten\ertrtsV1",text append

//WITHOUT ADJUSTMENT FOR BASELINE IMBALANCES

mi estimate, dots: regress ertrtsV2 i.RANDY i.strat_gpts ertrtsV0 i.demo_koen_t0 i.demo_studysite_t0

mimrgns i.RANDY

//WITH ADJUSTMENT FOR BASELINE IMBALANCES

mi estimate, dots: regress ertrtsV2 i.RANDY i.strat_gpts ertrtsV0 i.demo_koen_t0 i.demo_studysite_t0 Automatic_t0 tale_1_4_t0 tale_1_8_t0

mimrgns i.RANDY

log close

//Mixed model

mi reshape long ertrtsV, i(trial number) j(time)

log using "L:\LovbeskyttetMapper\Face your Fears\Carsten\ertrtsV1",text append

mi estimate,dots: mixed ertrtsV i.RANDY##i.time i.strat_gpts i.demo_koen_t0 i.demo_studysite_t0 || trial number: , noconstant residuals(unstructured,t(time))

mi test 1.RANDY#2.time 1.RANDY#1.time

log close

//Next outcome: ertrtf (ERT latency fear)

frame change default

use "L:\LovbeskyttetMapper\Face your Fears\Carsten\Final uden randomisering\fyf_wide_for_analysis.dta" ,clear

frlink 1:1 trial number, frame(cantab)

frget ertrtf*,from(cantab)

cd c:\temp

set seed 30092120

keep tale_1_13_t0 tale_1_17_t0 cdss_totalscore_t0 gse_totalscore_t0 bf_samvittigscore_t0 bf_neuroscore_t0 who5_total_t0 ///

ertrtfV2 Automatic_t0 trial number tale_1_4_t0 tale_1_8_t0 ertrtfV1 ertrtfV0 gpts_b_delscore_t0 demo_koen_t0 demo_studysite_t0 RANDBLIND sbq_avoid_t0

mi set flong

mi register imputed tale_1_13_t0 tale_1_17_t0 cdss_totalscore_t0 gse_totalscore_t0 bf_samvittigscore_t0 bf_neuroscore_t0 who5_total_t0 ///

Automatic_t0 tale_1_4_t0 tale_1_8_t0 ertrtfV1 ertrtfV2 ertrtfV0

mi impute mvn tale_1_13_t0 tale_1_17_t0 cdss_totalscore_t0 gse_totalscore_t0 bf_samvittigscore_t0 bf_neuroscore_t0 who5_total_t0 ///

Automatic_t0 tale_1_4_t0 tale_1_8_t0 ertrtfV1 ertrtfV2 ertrtfV0 = gpts_b_delscore_t0 sbq_avoid_t0 demo_koen_t0 demo_studysite_t0, prior(jeffreys) add(100) by(RANDBLIND)

gen strat_gpts= gpts_b_delscore_t0>=45

gen RANDY=RANDBLIND=="Y"

log using "L:\LovbeskyttetMapper\Face your Fears\Carsten\ertrtfV1",text replace

//WITHOUT ADJUSTMENT FOR BASELINE IMBALANCES

mi estimate, dots: regress ertrtfV1 i.RANDY i.strat_gpts ertrtfV0 i.demo_koen_t0 i.demo_studysite_t0

mimrgns i.RANDY

//WITH ADJUSTMENT FOR BASELINE IMBALANCES

mi estimate, dots: regress ertrtfV1 i.RANDY i.strat_gpts ertrtfV0 i.demo_koen_t0 i.demo_studysite_t0 Automatic_t0 tale_1_4_t0 tale_1_8_t0

mimrgns i.RANDY

log close

log using "L:\LovbeskyttetMapper\Face your Fears\Carsten\ertrtfV1",text append

//WITHOUT ADJUSTMENT FOR BASELINE IMBALANCES

mi estimate, dots: regress ertrtfV2 i.RANDY i.strat_gpts ertrtfV0 i.demo_koen_t0 i.demo_studysite_t0

mimrgns i.RANDY

//WITH ADJUSTMENT FOR BASELINE IMBALANCES

mi estimate, dots: regress ertrtfV2 i.RANDY i.strat_gpts ertrtfV0 i.demo_koen_t0 i.demo_studysite_t0 Automatic_t0 tale_1_4_t0 tale_1_8_t0

mimrgns i.RANDY

log close

//Mixed model

mi reshape long ertrtfV, i(trial number) j(time)

log using "L:\LovbeskyttetMapper\Face your Fears\Carsten\ertrtfV1",text append

mi estimate,dots: mixed ertrtfV i.RANDY##i.time i.strat_gpts i.demo_koen_t0 i.demo_studysite_t0 || trial number: , noconstant residuals(unstructured,t(time))

mi test 1.RANDY#2.time 1.RANDY#1.time

log close

//Next outcome: ertrta (ERT latency anger)

frame change default

use "L:\LovbeskyttetMapper\Face your Fears\Carsten\Final uden randomisering\fyf_wide_for_analysis.dta" ,clear

frlink 1:1 trial number, frame(cantab)

frget ertrta*,from(cantab)

cd c:\temp

set seed 30092122

keep tale_1_13_t0 tale_1_17_t0 cdss_totalscore_t0 gse_totalscore_t0 bf_samvittigscore_t0 bf_neuroscore_t0 who5_total_t0 ///

ertrtaV2 Automatic_t0 trial number tale_1_4_t0 tale_1_8_t0 ertrtaV1 ertrtaV0 gpts_b_delscore_t0 demo_koen_t0 demo_studysite_t0 RANDBLIND sbq_avoid_t0

mi set flong

mi register imputed tale_1_13_t0 tale_1_17_t0 cdss_totalscore_t0 gse_totalscore_t0 bf_samvittigscore_t0 bf_neuroscore_t0 who5_total_t0 ///

Automatic_t0 tale_1_4_t0 tale_1_8_t0 ertrtaV1 ertrtaV2 ertrtaV0

mi impute mvn tale_1_13_t0 tale_1_17_t0 cdss_totalscore_t0 gse_totalscore_t0 bf_samvittigscore_t0 bf_neuroscore_t0 who5_total_t0 ///

Automatic_t0 tale_1_4_t0 tale_1_8_t0 ertrtaV1 ertrtaV2 ertrtaV0 = gpts_b_delscore_t0 sbq_avoid_t0 demo_koen_t0 demo_studysite_t0, prior(jeffreys) add(100) by(RANDBLIND)

gen strat_gpts= gpts_b_delscore_t0>=45

gen RANDY=RANDBLIND=="Y"

log using "L:\LovbeskyttetMapper\Face your Fears\Carsten\ertrtaV1",text replace

//WITHOUT ADJUSTMENT FOR BASELINE IMBALANCES

mi estimate, dots: regress ertrtaV1 i.RANDY i.strat_gpts ertrtaV0 i.demo_koen_t0 i.demo_studysite_t0

mimrgns i.RANDY

//WITH ADJUSTMENT FOR BASELINE IMBALANCES

mi estimate, dots: regress ertrtaV1 i.RANDY i.strat_gpts ertrtaV0 i.demo_koen_t0 i.demo_studysite_t0 Automatic_t0 tale_1_4_t0 tale_1_8_t0

mimrgns i.RANDY

log close

log using "L:\LovbeskyttetMapper\Face your Fears\Carsten\ertrtaV1",text append

//WITHOUT ADJUSTMENT FOR BASELINE IMBALANCES

mi estimate, dots: regress ertrtaV2 i.RANDY i.strat_gpts ertrtaV0 i.demo_koen_t0 i.demo_studysite_t0

mimrgns i.RANDY

//WITH ADJUSTMENT FOR BASELINE IMBALANCES

mi estimate, dots: regress ertrtaV2 i.RANDY i.strat_gpts ertrtaV0 i.demo_koen_t0 i.demo_studysite_t0 Automatic_t0 tale_1_4_t0 tale_1_8_t0

mimrgns i.RANDY

log close

//Mixed model

mi reshape long ertrtaV, i(trial number) j(time)

log using "L:\LovbeskyttetMapper\Face your Fears\Carsten\ertrtaV1",text append

mi estimate,dots: mixed ertrtaV i.RANDY##i.time i.strat_gpts i.demo_koen_t0 i.demo_studysite_t0 || trial number: , noconstant residuals(unstructured,t(time))

mi test 1.RANDY#2.time 1.RANDY#1.time

log close

//Next outcome: ertrtd (ERT latency disgust)

frame change default

use "L:\LovbeskyttetMapper\Face your Fears\Carsten\Final uden randomisering\fyf_wide_for_analysis.dta" ,clear

frlink 1:1 trial number, frame(cantab)

frget ertrtd*,from(cantab)

cd c:\temp

set seed 30092126

keep tale_1_13_t0 tale_1_17_t0 cdss_totalscore_t0 gse_totalscore_t0 bf_samvittigscore_t0 bf_neuroscore_t0 who5_total_t0 ///

ertrtdV2 Automatic_t0 trial number tale_1_4_t0 tale_1_8_t0 ertrtdV1 ertrtdV0 gpts_b_delscore_t0 demo_koen_t0 demo_studysite_t0 RANDBLIND sbq_avoid_t0

mi set flong

mi register imputed tale_1_13_t0 tale_1_17_t0 cdss_totalscore_t0 gse_totalscore_t0 bf_samvittigscore_t0 bf_neuroscore_t0 who5_total_t0 ///

Automatic_t0 tale_1_4_t0 tale_1_8_t0 ertrtdV1 ertrtdV2 ertrtdV0

mi impute mvn tale_1_13_t0 tale_1_17_t0 cdss_totalscore_t0 gse_totalscore_t0 bf_samvittigscore_t0 bf_neuroscore_t0 who5_total_t0 ///

Automatic_t0 tale_1_4_t0 tale_1_8_t0 ertrtdV1 ertrtdV2 ertrtdV0 = gpts_b_delscore_t0 sbq_avoid_t0 demo_koen_t0 demo_studysite_t0, prior(jeffreys) add(100) by(RANDBLIND)

gen strat_gpts= gpts_b_delscore_t0>=45

gen RANDY=RANDBLIND=="Y"

log using "L:\LovbeskyttetMapper\Face your Fears\Carsten\ertrtdV1",text replace

//WITHOUT ADJUSTMENT FOR BASELINE IMBALANCES

mi estimate, dots: regress ertrtdV1 i.RANDY i.strat_gpts ertrtdV0 i.demo_koen_t0 i.demo_studysite_t0

mimrgns i.RANDY

//WITH ADJUSTMENT FOR BASELINE IMBALANCES

mi estimate, dots: regress ertrtdV1 i.RANDY i.strat_gpts ertrtdV0 i.demo_koen_t0 i.demo_studysite_t0 Automatic_t0 tale_1_4_t0 tale_1_8_t0

mimrgns i.RANDY

log close

log using "L:\LovbeskyttetMapper\Face your Fears\Carsten\ertrtdV1",text append

//WITHOUT ADJUSTMENT FOR BASELINE IMBALANCES

mi estimate, dots: regress ertrtdV2 i.RANDY i.strat_gpts ertrtdV0 i.demo_koen_t0 i.demo_studysite_t0

mimrgns i.RANDY

//WITH ADJUSTMENT FOR BASELINE IMBALANCES

mi estimate, dots: regress ertrtdV2 i.RANDY i.strat_gpts ertrtdV0 i.demo_koen_t0 i.demo_studysite_t0 Automatic_t0 tale_1_4_t0 tale_1_8_t0

mimrgns i.RANDY

log close

//Mixed model

mi reshape long ertrtdV, i(trial number) j(time)

log using "L:\LovbeskyttetMapper\Face your Fears\Carsten\ertrtdV1",text append

mi estimate,dots: mixed ertrtdV i.RANDY##i.time i.strat_gpts i.demo_koen_t0 i.demo_studysite_t0 || trial number: , noconstant residuals(unstructured,t(time))

mi test 1.RANDY#2.time 1.RANDY#1.time

log close

//Next outcome: ertth (ERT accuracy overall)

frame change default

use "L:\LovbeskyttetMapper\Face your Fears\Carsten\Final uden randomisering\fyf_wide_for_analysis.dta" ,clear

frlink 1:1 trial number, frame(cantab)

frget ertth*,from(cantab)

cd c:\temp

set seed 30092128

keep tale_1_13_t0 tale_1_17_t0 cdss_totalscore_t0 gse_totalscore_t0 bf_samvittigscore_t0 bf_neuroscore_t0 who5_total_t0 ///

ertthV2 Automatic_t0 trial number tale_1_4_t0 tale_1_8_t0 ertthV1 ertthV0 gpts_b_delscore_t0 demo_koen_t0 demo_studysite_t0 RANDBLIND sbq_avoid_t0

mi set flong

mi register imputed tale_1_13_t0 tale_1_17_t0 cdss_totalscore_t0 gse_totalscore_t0 bf_samvittigscore_t0 bf_neuroscore_t0 who5_total_t0 ///

Automatic_t0 tale_1_4_t0 tale_1_8_t0 ertthV1 ertthV2 ertthV0

mi impute mvn tale_1_13_t0 tale_1_17_t0 cdss_totalscore_t0 gse_totalscore_t0 bf_samvittigscore_t0 bf_neuroscore_t0 who5_total_t0 ///

Automatic_t0 tale_1_4_t0 tale_1_8_t0 ertthV1 ertthV2 ertthV0 = gpts_b_delscore_t0 sbq_avoid_t0 demo_koen_t0 demo_studysite_t0, prior(jeffreys) add(100) by(RANDBLIND)

gen strat_gpts= gpts_b_delscore_t0>=45

gen RANDY=RANDBLIND=="Y"

log using "L:\LovbeskyttetMapper\Face your Fears\Carsten\ertthV1",text replace

//WITHOUT ADJUSTMENT FOR BASELINE IMBALANCES

mi estimate, dots: regress ertthV1 i.RANDY i.strat_gpts ertthV0 i.demo_koen_t0 i.demo_studysite_t0

mimrgns i.RANDY

//WITH ADJUSTMENT FOR BASELINE IMBALANCES

mi estimate, dots: regress ertthV1 i.RANDY i.strat_gpts ertthV0 i.demo_koen_t0 i.demo_studysite_t0 Automatic_t0 tale_1_4_t0 tale_1_8_t0

mimrgns i.RANDY

log close

log using "L:\LovbeskyttetMapper\Face your Fears\Carsten\ertthV1",text append

//WITHOUT ADJUSTMENT FOR BASELINE IMBALANCES

mi estimate, dots: regress ertthV2 i.RANDY i.strat_gpts ertthV0 i.demo_koen_t0 i.demo_studysite_t0

mimrgns i.RANDY

//WITH ADJUSTMENT FOR BASELINE IMBALANCES

mi estimate, dots: regress ertthV2 i.RANDY i.strat_gpts ertthV0 i.demo_koen_t0 i.demo_studysite_t0 Automatic_t0 tale_1_4_t0 tale_1_8_t0

mimrgns i.RANDY

log close

//Mixed model

mi reshape long ertthV, i(trial number) j(time)

log using "L:\LovbeskyttetMapper\Face your Fears\Carsten\ertthV1",text append

mi estimate,dots: mixed ertthV i.RANDY##i.time i.strat_gpts i.demo_koen_t0 i.demo_studysite_t0 || trial number: , noconstant residuals(unstructured,t(time))

mi test 1.RANDY#2.time 1.RANDY#1.time

log close

//Next outcome: ertthh (ERT accuracy happiness)

frame change default

use "L:\LovbeskyttetMapper\Face your Fears\Carsten\Final uden randomisering\fyf_wide_for_analysis.dta" ,clear

frlink 1:1 trial number, frame(cantab)

frget ertthh*,from(cantab)

cd c:\temp

set seed 30092142

keep tale_1_13_t0 tale_1_17_t0 cdss_totalscore_t0 gse_totalscore_t0 bf_samvittigscore_t0 bf_neuroscore_t0 who5_total_t0 ///

ertthhV2 Automatic_t0 trial number tale_1_4_t0 tale_1_8_t0 ertthhV1 ertthhV0 gpts_b_delscore_t0 demo_koen_t0 demo_studysite_t0 RANDBLIND sbq_avoid_t0

mi set flong

mi register imputed tale_1_13_t0 tale_1_17_t0 cdss_totalscore_t0 gse_totalscore_t0 bf_samvittigscore_t0 bf_neuroscore_t0 who5_total_t0 ///

Automatic_t0 tale_1_4_t0 tale_1_8_t0 ertthhV1 ertthhV2 ertthhV0

mi impute mvn tale_1_13_t0 tale_1_17_t0 cdss_totalscore_t0 gse_totalscore_t0 bf_samvittigscore_t0 bf_neuroscore_t0 who5_total_t0 ///

Automatic_t0 tale_1_4_t0 tale_1_8_t0 ertthhV1 ertthhV2 ertthhV0 = gpts_b_delscore_t0 sbq_avoid_t0 demo_koen_t0 demo_studysite_t0, prior(jeffreys) add(100) by(RANDBLIND)

gen strat_gpts= gpts_b_delscore_t0>=45

gen RANDY=RANDBLIND=="Y"

log using "L:\LovbeskyttetMapper\Face your Fears\Carsten\ertthhV1",text replace

//WITHOUT ADJUSTMENT FOR BASELINE IMBALANCES

mi estimate, dots: regress ertthhV1 i.RANDY i.strat_gpts ertthhV0 i.demo_koen_t0 i.demo_studysite_t0

mimrgns i.RANDY

//WITH ADJUSTMENT FOR BASELINE IMBALANCES

mi estimate, dots: regress ertthhV1 i.RANDY i.strat_gpts ertthhV0 i.demo_koen_t0 i.demo_studysite_t0 Automatic_t0 tale_1_4_t0 tale_1_8_t0

mimrgns i.RANDY

log close

log using "L:\LovbeskyttetMapper\Face your Fears\Carsten\ertthhV1",text append

//WITHOUT ADJUSTMENT FOR BASELINE IMBALANCES

mi estimate, dots: regress ertthhV2 i.RANDY i.strat_gpts ertthhV0 i.demo_koen_t0 i.demo_studysite_t0

mimrgns i.RANDY

//WITH ADJUSTMENT FOR BASELINE IMBALANCES

mi estimate, dots: regress ertthhV2 i.RANDY i.strat_gpts ertthhV0 i.demo_koen_t0 i.demo_studysite_t0 Automatic_t0 tale_1_4_t0 tale_1_8_t0

mimrgns i.RANDY

log close

//Mixed model

mi reshape long ertthhV, i(trial number) j(time)

log using "L:\LovbeskyttetMapper\Face your Fears\Carsten\ertthhV1",text append

mi estimate,dots: mixed ertthhV i.RANDY##i.time i.strat_gpts i.demo_koen_t0 i.demo_studysite_t0 || trial number: , noconstant residuals(unstructured,t(time))

mi test 1.RANDY#2.time 1.RANDY#1.time

log close

//Next outcome: ertths (ERT accuracy sadness)

frame change default

use "L:\LovbeskyttetMapper\Face your Fears\Carsten\Final uden randomisering\fyf_wide_for_analysis.dta" ,clear

frlink 1:1 trial number, frame(cantab)

frget ertths*,from(cantab)

cd c:\temp

set seed 30092150

keep tale_1_13_t0 tale_1_17_t0 cdss_totalscore_t0 gse_totalscore_t0 bf_samvittigscore_t0 bf_neuroscore_t0 who5_total_t0 ///

ertthsV2 Automatic_t0 trial number tale_1_4_t0 tale_1_8_t0 ertthsV1 ertthsV0 gpts_b_delscore_t0 demo_koen_t0 demo_studysite_t0 RANDBLIND sbq_avoid_t0

mi set flong

mi register imputed tale_1_13_t0 tale_1_17_t0 cdss_totalscore_t0 gse_totalscore_t0 bf_samvittigscore_t0 bf_neuroscore_t0 who5_total_t0 ///

Automatic_t0 tale_1_4_t0 tale_1_8_t0 ertthsV1 ertthsV2 ertthsV0

mi impute mvn tale_1_13_t0 tale_1_17_t0 cdss_totalscore_t0 gse_totalscore_t0 bf_samvittigscore_t0 bf_neuroscore_t0 who5_total_t0 ///

Automatic_t0 tale_1_4_t0 tale_1_8_t0 ertthsV1 ertthsV2 ertthsV0 = gpts_b_delscore_t0 sbq_avoid_t0 demo_koen_t0 demo_studysite_t0, prior(jeffreys) add(100) by(RANDBLIND)

gen strat_gpts= gpts_b_delscore_t0>=45

gen RANDY=RANDBLIND=="Y"

log using "L:\LovbeskyttetMapper\Face your Fears\Carsten\ertthsV1",text replace

//WITHOUT ADJUSTMENT FOR BASELINE IMBALANCES

mi estimate, dots: regress ertthsV1 i.RANDY i.strat_gpts ertthsV0 i.demo_koen_t0 i.demo_studysite_t0

mimrgns i.RANDY

//WITH ADJUSTMENT FOR BASELINE IMBALANCES

mi estimate, dots: regress ertthsV1 i.RANDY i.strat_gpts ertthsV0 i.demo_koen_t0 i.demo_studysite_t0 Automatic_t0 tale_1_4_t0 tale_1_8_t0

mimrgns i.RANDY

log close

log using "L:\LovbeskyttetMapper\Face your Fears\Carsten\ertthsV1",text append

//WITHOUT ADJUSTMENT FOR BASELINE IMBALANCES

mi estimate, dots: regress ertthsV2 i.RANDY i.strat_gpts ertthsV0 i.demo_koen_t0 i.demo_studysite_t0

mimrgns i.RANDY

//WITH ADJUSTMENT FOR BASELINE IMBALANCES

mi estimate, dots: regress ertthsV2 i.RANDY i.strat_gpts ertthsV0 i.demo_koen_t0 i.demo_studysite_t0 Automatic_t0 tale_1_4_t0 tale_1_8_t0

mimrgns i.RANDY

log close

//Mixed model

mi reshape long ertthsV, i(trial number) j(time)

log using "L:\LovbeskyttetMapper\Face your Fears\Carsten\ertthsV1",text append

mi estimate,dots: mixed ertthsV i.RANDY##i.time i.strat_gpts i.demo_koen_t0 i.demo_studysite_t0 || trial number: , noconstant residuals(unstructured,t(time))

mi test 1.RANDY#2.time 1.RANDY#1.time

log close

//Next outcome: ertthf (ERT accuracy fear)

frame change default

use "L:\LovbeskyttetMapper\Face your Fears\Carsten\Final uden randomisering\fyf_wide_for_analysis.dta" ,clear

frlink 1:1 trial number, frame(cantab)

frget ertthf*,from(cantab)

cd c:\temp

set seed 30092152

keep tale_1_13_t0 tale_1_17_t0 cdss_totalscore_t0 gse_totalscore_t0 bf_samvittigscore_t0 bf_neuroscore_t0 who5_total_t0 ///

ertthfV2 Automatic_t0 trial number tale_1_4_t0 tale_1_8_t0 ertthfV1 ertthfV0 gpts_b_delscore_t0 demo_koen_t0 demo_studysite_t0 RANDBLIND sbq_avoid_t0

mi set flong

mi register imputed tale_1_13_t0 tale_1_17_t0 cdss_totalscore_t0 gse_totalscore_t0 bf_samvittigscore_t0 bf_neuroscore_t0 who5_total_t0 ///

Automatic_t0 tale_1_4_t0 tale_1_8_t0 ertthfV1 ertthfV2 ertthfV0

mi impute mvn tale_1_13_t0 tale_1_17_t0 cdss_totalscore_t0 gse_totalscore_t0 bf_samvittigscore_t0 bf_neuroscore_t0 who5_total_t0 ///

Automatic_t0 tale_1_4_t0 tale_1_8_t0 ertthfV1 ertthfV2 ertthfV0 = gpts_b_delscore_t0 sbq_avoid_t0 demo_koen_t0 demo_studysite_t0, prior(jeffreys) add(100) by(RANDBLIND)

gen strat_gpts= gpts_b_delscore_t0>=45

gen RANDY=RANDBLIND=="Y"

log using "L:\LovbeskyttetMapper\Face your Fears\Carsten\ertthfV1",text replace

//WITHOUT ADJUSTMENT FOR BASELINE IMBALANCES

mi estimate, dots: regress ertthfV1 i.RANDY i.strat_gpts ertthfV0 i.demo_koen_t0 i.demo_studysite_t0

mimrgns i.RANDY

//WITH ADJUSTMENT FOR BASELINE IMBALANCES

mi estimate, dots: regress ertthfV1 i.RANDY i.strat_gpts ertthfV0 i.demo_koen_t0 i.demo_studysite_t0 Automatic_t0 tale_1_4_t0 tale_1_8_t0

mimrgns i.RANDY

log close

log using "L:\LovbeskyttetMapper\Face your Fears\Carsten\ertthfV1",text append

//WITHOUT ADJUSTMENT FOR BASELINE IMBALANCES

mi estimate, dots: regress ertthfV2 i.RANDY i.strat_gpts ertthfV0 i.demo_koen_t0 i.demo_studysite_t0

mimrgns i.RANDY

//WITH ADJUSTMENT FOR BASELINE IMBALANCES

mi estimate, dots: regress ertthfV2 i.RANDY i.strat_gpts ertthfV0 i.demo_koen_t0 i.demo_studysite_t0 Automatic_t0 tale_1_4_t0 tale_1_8_t0

mimrgns i.RANDY

log close

//Mixed model

mi reshape long ertthfV, i(trial number) j(time)

log using "L:\LovbeskyttetMapper\Face your Fears\Carsten\ertthfV1",text append

mi estimate,dots: mixed ertthfV i.RANDY##i.time i.strat_gpts i.demo_koen_t0 i.demo_studysite_t0 || trial number: , noconstant residuals(unstructured,t(time))

mi test 1.RANDY#2.time 1.RANDY#1.time

log close

//Next outcome: erttha (ERT accuracy anger)

frame change default

use "L:\LovbeskyttetMapper\Face your Fears\Carsten\Final uden randomisering\fyf_wide_for_analysis.dta" ,clear

frlink 1:1 trial number, frame(cantab)

frget erttha*,from(cantab)

cd c:\temp

set seed 30092155

keep tale_1_13_t0 tale_1_17_t0 cdss_totalscore_t0 gse_totalscore_t0 bf_samvittigscore_t0 bf_neuroscore_t0 who5_total_t0 ///

ertthaV2 Automatic_t0 trial number tale_1_4_t0 tale_1_8_t0 ertthaV1 ertthaV0 gpts_b_delscore_t0 demo_koen_t0 demo_studysite_t0 RANDBLIND sbq_avoid_t0

mi set flong

mi register imputed tale_1_13_t0 tale_1_17_t0 cdss_totalscore_t0 gse_totalscore_t0 bf_samvittigscore_t0 bf_neuroscore_t0 who5_total_t0 ///

Automatic_t0 tale_1_4_t0 tale_1_8_t0 ertthaV1 ertthaV2 ertthaV0

mi impute mvn tale_1_13_t0 tale_1_17_t0 cdss_totalscore_t0 gse_totalscore_t0 bf_samvittigscore_t0 bf_neuroscore_t0 who5_total_t0 ///

Automatic_t0 tale_1_4_t0 tale_1_8_t0 ertthaV1 ertthaV2 ertthaV0 = gpts_b_delscore_t0 sbq_avoid_t0 demo_koen_t0 demo_studysite_t0, prior(jeffreys) add(100) by(RANDBLIND)

gen strat_gpts= gpts_b_delscore_t0>=45

gen RANDY=RANDBLIND=="Y"

log using "L:\LovbeskyttetMapper\Face your Fears\Carsten\ertthaV1",text replace

//WITHOUT ADJUSTMENT FOR BASELINE IMBALANCES

mi estimate, dots: regress ertthaV1 i.RANDY i.strat_gpts ertthaV0 i.demo_koen_t0 i.demo_studysite_t0

mimrgns i.RANDY

//WITH ADJUSTMENT FOR BASELINE IMBALANCES

mi estimate, dots: regress ertthaV1 i.RANDY i.strat_gpts ertthaV0 i.demo_koen_t0 i.demo_studysite_t0 Automatic_t0 tale_1_4_t0 tale_1_8_t0

mimrgns i.RANDY

log close

log using "L:\LovbeskyttetMapper\Face your Fears\Carsten\ertthaV1",text append

//WITHOUT ADJUSTMENT FOR BASELINE IMBALANCES

mi estimate, dots: regress ertthaV2 i.RANDY i.strat_gpts ertthaV0 i.demo_koen_t0 i.demo_studysite_t0

mimrgns i.RANDY

//WITH ADJUSTMENT FOR BASELINE IMBALANCES

mi estimate, dots: regress ertthaV2 i.RANDY i.strat_gpts ertthaV0 i.demo_koen_t0 i.demo_studysite_t0 Automatic_t0 tale_1_4_t0 tale_1_8_t0

mimrgns i.RANDY

log close

//Mixed model

mi reshape long ertthaV, i(trial number) j(time)

log using "L:\LovbeskyttetMapper\Face your Fears\Carsten\ertthaV1",text append

mi estimate,dots: mixed ertthaV i.RANDY##i.time i.strat_gpts i.demo_koen_t0 i.demo_studysite_t0 || trial number: , noconstant residuals(unstructured,t(time))

mi test 1.RANDY#2.time 1.RANDY#1.time

log close

//Next outcome: erttha (ERT accuracy anger)

frame change default

use "L:\LovbeskyttetMapper\Face your Fears\Carsten\Final uden randomisering\fyf_wide_for_analysis.dta" ,clear

frlink 1:1 trial number, frame(cantab)

frget erttha*,from(cantab)

cd c:\temp

set seed 30092157

keep tale_1_13_t0 tale_1_17_t0 cdss_totalscore_t0 gse_totalscore_t0 bf_samvittigscore_t0 bf_neuroscore_t0 who5_total_t0 ///

ertthaV2 Automatic_t0 trial number tale_1_4_t0 tale_1_8_t0 ertthaV1 ertthaV0 gpts_b_delscore_t0 demo_koen_t0 demo_studysite_t0 RANDBLIND sbq_avoid_t0

mi set flong

mi register imputed tale_1_13_t0 tale_1_17_t0 cdss_totalscore_t0 gse_totalscore_t0 bf_samvittigscore_t0 bf_neuroscore_t0 who5_total_t0 ///

Automatic_t0 tale_1_4_t0 tale_1_8_t0 ertthaV1 ertthaV2 ertthaV0

mi impute mvn tale_1_13_t0 tale_1_17_t0 cdss_totalscore_t0 gse_totalscore_t0 bf_samvittigscore_t0 bf_neuroscore_t0 who5_total_t0 ///

Automatic_t0 tale_1_4_t0 tale_1_8_t0 ertthaV1 ertthaV2 ertthaV0 = gpts_b_delscore_t0 sbq_avoid_t0 demo_koen_t0 demo_studysite_t0, prior(jeffreys) add(100) by(RANDBLIND)

gen strat_gpts= gpts_b_delscore_t0>=45

gen RANDY=RANDBLIND=="Y"

log using "L:\LovbeskyttetMapper\Face your Fears\Carsten\ertthaV1",text replace

//WITHOUT ADJUSTMENT FOR BASELINE IMBALANCES

mi estimate, dots: regress ertthaV1 i.RANDY i.strat_gpts ertthaV0 i.demo_koen_t0 i.demo_studysite_t0

mimrgns i.RANDY

//WITH ADJUSTMENT FOR BASELINE IMBALANCES

mi estimate, dots: regress ertthaV1 i.RANDY i.strat_gpts ertthaV0 i.demo_koen_t0 i.demo_studysite_t0 Automatic_t0 tale_1_4_t0 tale_1_8_t0

mimrgns i.RANDY

log close

log using "L:\LovbeskyttetMapper\Face your Fears\Carsten\ertthaV1",text append

//WITHOUT ADJUSTMENT FOR BASELINE IMBALANCES

mi estimate, dots: regress ertthaV2 i.RANDY i.strat_gpts ertthaV0 i.demo_koen_t0 i.demo_studysite_t0

mimrgns i.RANDY

//WITH ADJUSTMENT FOR BASELINE IMBALANCES

mi estimate, dots: regress ertthaV2 i.RANDY i.strat_gpts ertthaV0 i.demo_koen_t0 i.demo_studysite_t0 Automatic_t0 tale_1_4_t0 tale_1_8_t0

mimrgns i.RANDY

log close

//Mixed model

mi reshape long ertthaV, i(trial number) j(time)

log using "L:\LovbeskyttetMapper\Face your Fears\Carsten\ertthaV1",text append

mi estimate,dots: mixed ertthaV i.RANDY##i.time i.strat_gpts i.demo_koen_t0 i.demo_studysite_t0 || trial number: , noconstant residuals(unstructured,t(time))

mi test 1.RANDY#2.time 1.RANDY#1.time

log close

//Next outcome: ertthsu (ERT accuracy surprise)

frame change default

use "L:\LovbeskyttetMapper\Face your Fears\Carsten\Final uden randomisering\fyf_wide_for_analysis.dta" ,clear

frlink 1:1 trial number, frame(cantab)

frget ertthsu*,from(cantab)

cd c:\temp

set seed 30092202

keep tale_1_13_t0 tale_1_17_t0 cdss_totalscore_t0 gse_totalscore_t0 bf_samvittigscore_t0 bf_neuroscore_t0 who5_total_t0 ///

ertthsuV2 Automatic_t0 trial number tale_1_4_t0 tale_1_8_t0 ertthsuV1 ertthsuV0 gpts_b_delscore_t0 demo_koen_t0 demo_studysite_t0 RANDBLIND sbq_avoid_t0

mi set flong

mi register imputed tale_1_13_t0 tale_1_17_t0 cdss_totalscore_t0 gse_totalscore_t0 bf_samvittigscore_t0 bf_neuroscore_t0 who5_total_t0 ///

Automatic_t0 tale_1_4_t0 tale_1_8_t0 ertthsuV1 ertthsuV2 ertthsuV0

mi impute mvn tale_1_13_t0 tale_1_17_t0 cdss_totalscore_t0 gse_totalscore_t0 bf_samvittigscore_t0 bf_neuroscore_t0 who5_total_t0 ///

Automatic_t0 tale_1_4_t0 tale_1_8_t0 ertthsuV1 ertthsuV2 ertthsuV0 = gpts_b_delscore_t0 sbq_avoid_t0 demo_koen_t0 demo_studysite_t0, prior(jeffreys) add(100) by(RANDBLIND)

gen strat_gpts= gpts_b_delscore_t0>=45

gen RANDY=RANDBLIND=="Y"

log using "L:\LovbeskyttetMapper\Face your Fears\Carsten\ertthsuV1",text replace

//WITHOUT ADJUSTMENT FOR BASELINE IMBALANCES

mi estimate, dots: regress ertthsuV1 i.RANDY i.strat_gpts ertthsuV0 i.demo_koen_t0 i.demo_studysite_t0

mimrgns i.RANDY

//WITH ADJUSTMENT FOR BASELINE IMBALANCES

mi estimate, dots: regress ertthsuV1 i.RANDY i.strat_gpts ertthsuV0 i.demo_koen_t0 i.demo_studysite_t0 Automatic_t0 tale_1_4_t0 tale_1_8_t0

mimrgns i.RANDY

log close

log using "L:\LovbeskyttetMapper\Face your Fears\Carsten\ertthsuV1",text append

//WITHOUT ADJUSTMENT FOR BASELINE IMBALANCES

mi estimate, dots: regress ertthsuV2 i.RANDY i.strat_gpts ertthsuV0 i.demo_koen_t0 i.demo_studysite_t0

mimrgns i.RANDY

//WITH ADJUSTMENT FOR BASELINE IMBALANCES

mi estimate, dots: regress ertthsuV2 i.RANDY i.strat_gpts ertthsuV0 i.demo_koen_t0 i.demo_studysite_t0 Automatic_t0 tale_1_4_t0 tale_1_8_t0

mimrgns i.RANDY

log close

//Mixed model

mi reshape long ertthsuV, i(trial number) j(time)

log using "L:\LovbeskyttetMapper\Face your Fears\Carsten\ertthsuV1",text append

mi estimate,dots: mixed ertthsuV i.RANDY##i.time i.strat_gpts i.demo_koen_t0 i.demo_studysite_t0 || trial number: , noconstant residuals(unstructured,t(time))

mi test 1.RANDY#2.time 1.RANDY#1.time

log close

//Next outcome: ertthd (ERT accuracy disgust)

frame change default

use "L:\LovbeskyttetMapper\Face your Fears\Carsten\Final uden randomisering\fyf_wide_for_analysis.dta" ,clear

frlink 1:1 trial number, frame(cantab)

frget ertthd*,from(cantab)

cd c:\temp

set seed 30092204

keep tale_1_13_t0 tale_1_17_t0 cdss_totalscore_t0 gse_totalscore_t0 bf_samvittigscore_t0 bf_neuroscore_t0 who5_total_t0 ///

ertthdV2 Automatic_t0 trial number tale_1_4_t0 tale_1_8_t0 ertthdV1 ertthdV0 gpts_b_delscore_t0 demo_koen_t0 demo_studysite_t0 RANDBLIND sbq_avoid_t0

mi set flong

mi register imputed tale_1_13_t0 tale_1_17_t0 cdss_totalscore_t0 gse_totalscore_t0 bf_samvittigscore_t0 bf_neuroscore_t0 who5_total_t0 ///

Automatic_t0 tale_1_4_t0 tale_1_8_t0 ertthdV1 ertthdV2 ertthdV0

mi impute mvn tale_1_13_t0 tale_1_17_t0 cdss_totalscore_t0 gse_totalscore_t0 bf_samvittigscore_t0 bf_neuroscore_t0 who5_total_t0 ///

Automatic_t0 tale_1_4_t0 tale_1_8_t0 ertthdV1 ertthdV2 ertthdV0 = gpts_b_delscore_t0 sbq_avoid_t0 demo_koen_t0 demo_studysite_t0, prior(jeffreys) add(100) by(RANDBLIND)

gen strat_gpts= gpts_b_delscore_t0>=45

gen RANDY=RANDBLIND=="Y"

log using "L:\LovbeskyttetMapper\Face your Fears\Carsten\ertthdV1",text replace

//WITHOUT ADJUSTMENT FOR BASELINE IMBALANCES

mi estimate, dots: regress ertthdV1 i.RANDY i.strat_gpts ertthdV0 i.demo_koen_t0 i.demo_studysite_t0

mimrgns i.RANDY

//WITH ADJUSTMENT FOR BASELINE IMBALANCES

mi estimate, dots: regress ertthdV1 i.RANDY i.strat_gpts ertthdV0 i.demo_koen_t0 i.demo_studysite_t0 Automatic_t0 tale_1_4_t0 tale_1_8_t0

mimrgns i.RANDY

log close

log using "L:\LovbeskyttetMapper\Face your Fears\Carsten\ertthdV1",text append

//WITHOUT ADJUSTMENT FOR BASELINE IMBALANCES

mi estimate, dots: regress ertthdV2 i.RANDY i.strat_gpts ertthdV0 i.demo_koen_t0 i.demo_studysite_t0

mimrgns i.RANDY

//WITH ADJUSTMENT FOR BASELINE IMBALANCES

mi estimate, dots: regress ertthdV2 i.RANDY i.strat_gpts ertthdV0 i.demo_koen_t0 i.demo_studysite_t0 Automatic_t0 tale_1_4_t0 tale_1_8_t0

mimrgns i.RANDY

log close

//Mixed model

mi reshape long ertthdV, i(trial number) j(time)

log using "L:\LovbeskyttetMapper\Face your Fears\Carsten\ertthdV1",text append

mi estimate,dots: mixed ertthdV i.RANDY##i.time i.strat_gpts i.demo_koen_t0 i.demo_studysite_t0 || trial number: , noconstant residuals(unstructured,t(time))

mi test 1.RANDY#2.time 1.RANDY#1.time

log close

//CSQ, no imputations

frame change default

use "L:\LovbeskyttetMapper\Face your Fears\Carsten\Final uden randomisering\fyf_wide_for_analysis.dta" ,clear

drop csq_client*

egen csqokay=rownonmiss(csq*1)

recode csq_kvalitet_t1 csq_behov_t1 csq_loese_problemer_t1 csq_tilfredshed_t1 (1=4) (2=3) (3=2) (4=1)

egen csq=rowtotal(csq*1) if csqokay==8

gen strat_gpts= gpts_b_delscore_t0>=45

gen RANDY=RANDBLIND=="Y"

log using csq,text replace

//Ikke justeret for skæv baseline

regress csq i.strat_gpts i.demo_koen_t0 i.demo_studysite_t0 i.RANDY

margins i.RANDY

//WITH ADJUSTMENT FOR BASELINE IMBALANCES

regress csq i.RANDY i.strat_gpts i.demo_koen_t0 i.demo_studysite_t0 Automatic_t0 tale_1_4_t0 tale_1_8_t0

margins i.RANDY

log close

//Next outcome: selvskade_uge

frame change default

use "L:\LovbeskyttetMapper\Face your Fears\Carsten\Final uden randomisering\fyf_wide_for_analysis.dta" ,clear

cd c:\temp

set seed 14101107

keep tale_1_13_t0 tale_1_17_t0 cdss_totalscore_t0 gse_totalscore_t0 bf_samvittigscore_t0 bf_neuroscore_t0 who5_total_t0 ///

selvskade_uge_t2 Automatic_t0 trial number tale_1_4_t0 tale_1_8_t0 selvskade_uge_t1 selvskade_uge_t0 gpts_b_delscore_t0 demo_koen_t0 demo_studysite_t0 RANDBLIND sbq_avoid_t0

mi set flong

mi register imputed tale_1_13_t0 tale_1_17_t0 cdss_totalscore_t0 gse_totalscore_t0 bf_samvittigscore_t0 bf_neuroscore_t0 who5_total_t0 ///

Automatic_t0 tale_1_4_t0 tale_1_8_t0 selvskade_uge_t1 selvskade_uge_t2 selvskade_uge_t0

mi impute mvn tale_1_13_t0 tale_1_17_t0 cdss_totalscore_t0 gse_totalscore_t0 bf_samvittigscore_t0 bf_neuroscore_t0 who5_total_t0 ///

Automatic_t0 tale_1_4_t0 tale_1_8_t0 = i.selvskade_uge_t0 gpts_b_delscore_t0 sbq_avoid_t0 demo_koen_t0 demo_studysite_t0, add(100) prior(jeffreys) by(RANDBLIND)

mi impute chained (logit,augment) selvskade_uge_t1 selvskade_uge_t2 = i.selvskade_uge_t0 gpts_b_delscore_t0 sbq_avoid_t0 demo_koen_t0 demo_studysite_t0, replace by(RANDBLIND)

gen strat_gpts= gpts_b_delscore_t0>=45

gen RANDY=RANDBLIND=="Y"

log using "L:\LovbeskyttetMapper\Face your Fears\Carsten\selvskade_uge_t1",text replace

//WITHOUT ADJUSTMENT FOR BASELINE IMBALANCES

mi estimate, dots or: logistic selvskade_uge_t1 i.RANDY i.strat_gpts selvskade_uge_t0 i.demo_koen_t0 i.demo_studysite_t0

mimrgns i.RANDY,predict(pr)

//WITH ADJUSTMENT FOR BASELINE IMBALANCES

mi estimate, dots or: logistic selvskade_uge_t1 i.RANDY i.strat_gpts selvskade_uge_t0 i.demo_koen_t0 i.demo_studysite_t0 Automatic_t0 tale_1_4_t0 tale_1_8_t0

mimrgns i.RANDY,predict(pr)

log close

log using "L:\LovbeskyttetMapper\Face your Fears\Carsten\selvskade_uge_t1",text append

//WITHOUT ADJUSTMENT FOR BASELINE IMBALANCES

mi estimate, dots or: logistic selvskade_uge_t2 i.RANDY i.strat_gpts selvskade_uge_t0 i.demo_koen_t0 i.demo_studysite_t0

mimrgns i.RANDY,predict(pr)

//WITH ADJUSTMENT FOR BASELINE IMBALANCES

mi estimate, dots or: logistic selvskade_uge_t2 i.RANDY i.strat_gpts selvskade_uge_t0 i.demo_koen_t0 i.demo_studysite_t0 Automatic_t0 tale_1_4_t0 tale_1_8_t0

mimrgns i.RANDY,predict(pr)

log close

//Mixed model

mi reshape long selvskade_uge_t, i(trial number) j(time)

log using "L:\LovbeskyttetMapper\Face your Fears\Carsten\selvskade_uge_t1",text append

mi xtset trial number time

mi estimate,dots: xtlogit selvskade_uge_t i.RANDY##i.time i.strat_gpts i.demo_koen_t0 i.demo_studysite_t0

mi test 1.RANDY#2.time 1.RANDY#1.time

log close

//Next outcome: ertrsu (ERT latency surprise)

frame change default

use "L:\LovbeskyttetMapper\Face your Fears\Carsten\Final uden randomisering\fyf_wide_for_analysis.dta" ,clear

frlink 1:1 trial number, frame(cantab)

frget ertrsu*,from(cantab)

ren ertrsuV1 ertrsuV0

ren ertrsuV2 ertrsuV1

ren ertrsuV3 ertrsuV2

cd c:\temp

set seed 14100956

keep tale_1_13_t0 tale_1_17_t0 cdss_totalscore_t0 gse_totalscore_t0 bf_samvittigscore_t0 bf_neuroscore_t0 who5_total_t0 ///

ertrsuV2 Automatic_t0 trial number tale_1_4_t0 tale_1_8_t0 ertrsuV1 ertrsuV0 gpts_b_delscore_t0 demo_koen_t0 demo_studysite_t0 RANDBLIND sbq_avoid_t0

mi set flong

mi register imputed tale_1_13_t0 tale_1_17_t0 cdss_totalscore_t0 gse_totalscore_t0 bf_samvittigscore_t0 bf_neuroscore_t0 who5_total_t0 ///

Automatic_t0 tale_1_4_t0 tale_1_8_t0 ertrsuV1 ertrsuV2 ertrsuV0

mi impute mvn tale_1_13_t0 tale_1_17_t0 cdss_totalscore_t0 gse_totalscore_t0 bf_samvittigscore_t0 bf_neuroscore_t0 who5_total_t0 ///

Automatic_t0 tale_1_4_t0 tale_1_8_t0 ertrsuV1 ertrsuV2 ertrsuV0 = gpts_b_delscore_t0 sbq_avoid_t0 demo_koen_t0 demo_studysite_t0, prior(jeffreys) add(100) by(RANDBLIND)

gen strat_gpts= gpts_b_delscore_t0>=45

gen RANDY=RANDBLIND=="Y"

log using "L:\LovbeskyttetMapper\Face your Fears\Carsten\ertrsuV1",text replace

//WITHOUT ADJUSTMENT FOR BASELINE IMBALANCES

mi estimate, dots: regress ertrsuV1 i.RANDY i.strat_gpts ertrsuV0 i.demo_koen_t0 i.demo_studysite_t0

mimrgns i.RANDY

//WITH ADJUSTMENT FOR BASELINE IMBALANCES

mi estimate, dots: regress ertrsuV1 i.RANDY i.strat_gpts ertrsuV0 i.demo_koen_t0 i.demo_studysite_t0 Automatic_t0 tale_1_4_t0 tale_1_8_t0

mimrgns i.RANDY

log close

log using "L:\LovbeskyttetMapper\Face your Fears\Carsten\ertrsuV1",text append

//WITHOUT ADJUSTMENT FOR BASELINE IMBALANCES

mi estimate, dots: regress ertrsuV2 i.RANDY i.strat_gpts ertrsuV0 i.demo_koen_t0 i.demo_studysite_t0

mimrgns i.RANDY

//WITH ADJUSTMENT FOR BASELINE IMBALANCES

mi estimate, dots: regress ertrsuV2 i.RANDY i.strat_gpts ertrsuV0 i.demo_koen_t0 i.demo_studysite_t0 Automatic_t0 tale_1_4_t0 tale_1_8_t0

mimrgns i.RANDY

log close

//Mixed model

mi reshape long ertrsuV, i(trial number) j(time)

log using "L:\LovbeskyttetMapper\Face your Fears\Carsten\ertrsuV1",text append

mi estimate,dots: mixed ertrsuV i.RANDY##i.time i.strat_gpts i.demo_koen_t0 i.demo_studysite_t0 || trial number: , noconstant residuals(unstructured,t(time))

mi test 1.RANDY#2.time 1.RANDY#1.time

log close

use "L:\LovbeskyttetMapper\Face your Fears\Carsten\Final uden randomisering\fyf_wide_for_analysis.dta" ,clear

tab followup_3mdr_drop

gen RANDY=RANDBLIND=="Y"

log using "L:\LovbeskyttetMapper\Face your Fears\Carsten\dropout_reasons",text replace

forvalues g=1/7{

tab followup_3mdr_drop___`g'_t1 RANDY ,col chi

}

forvalues g=1/7{

tab followup_9mdr_drop___`g'_t2 RANDY ,col chi

}
