# Supplementary material for: Face Your Fears: Virtual reality-based cognitive behavioral therapy (VR-CBT) versus standard CBT for paranoia in patients with schizophrenia spectrum disorders: Results of a randomized clinical trial
Source: Research Square preprint supplement (doi:10.21203/rs.3.rs-5593252/v1), 2024-12-12
Supplement: Supplementary file 3 [file 6e220ce84682ba8ccc7399e9.docx]

*IPQ
* Descriptive statistics for individual items at time points .1 and .9, and mean scores.

DESCRIPTIVES VARIABLES = ipq_1.1 TO ipq_14.1 ipq_1.9 TO ipq_14.9 ipq_mean_1 ipq_mean_9

/STATISTICS = MEAN STDDEV MIN MAX.

* Descriptive statistics for adjusted items at time points .1 and .9, including mean scores.

DESCRIPTIVES VARIABLES = ipq_1.1 ipq_2.1 ipq_3.1 ipq_4.1 ipq_5.1 ipq_6.1 ipq_7.1 ipq_8.1 ipq_9.1 ipq_10.1 ipq_11.1 ipq_12.1 ipq_13.1 ipq_14.1

ipq_1.9 ipq_2.9 ipq_3.9 ipq_4.9 ipq_5.9 ipq_6.9 ipq_7.9 ipq_8.9 ipq_9.9 ipq_10.9 ipq_11.9 ipq_12.9 ipq_13.9 ipq_14.9

ipq_mean_1 ipq_mean_9 IPQ_mean_total

/STATISTICS = MEAN STDDEV MIN MAX.

* Calculate sum and mean scores for SSQ items at time points .1 and .2.

* Sum scores for time point .1.

COMPUTE ssq_sum_1 = SUM(ssq_1.1 TO ssq_16.1).

EXECUTE.

* Mean scores for time point .1.

COMPUTE ssq_mean_1 = MEAN(ssq_1.1 TO ssq_16.1).

EXECUTE.

* Sum scores for time point .2.

COMPUTE ssq_sum_2 = SUM(ssq_1.2 TO ssq_16.2).

EXECUTE.

* Mean scores for time point .2.

COMPUTE ssq_mean_2 = MEAN(ssq_1.2 TO ssq_16.2).

EXECUTE.

* Calculate mean of sum scores across both time points.

COMPUTE ssq_sum_mean = MEAN(ssq_sum_1, ssq_sum_2).

EXECUTE.

* Descriptive statistics including the mean of sum scores.

DESCRIPTIVES VARIABLES = ssq_1.1 TO ssq_16.1 ssq_1.2 TO ssq_16.2 ssq_sum_1 ssq_sum_2 ssq_sum_mean

/STATISTICS = MEAN STDDEV MIN MAX.

* Descriptive statistics for SSQ items at time points .1 and .2, and the mean of sum scores (ssq_sum_mean).

DESCRIPTIVES VARIABLES = ssq_1.1 ssq_2.1 ssq_3.1 ssq_4.1 ssq_5.1 ssq_6.1 ssq_7.1 ssq_8.1 ssq_9.1 ssq_10.1 ssq_11.1 ssq_12.1 ssq_13.1 ssq_14.1 ssq_15.1 ssq_16.1

ssq_1.2 ssq_2.2 ssq_3.2 ssq_4.2 ssq_5.2 ssq_6.2 ssq_7.2 ssq_8.2 ssq_9.2 ssq_10.2 ssq_11.2 ssq_12.2 ssq_13.2 ssq_14.2 ssq_15.2 ssq_16.2

ssq_sum_1 ssq_sum_2 ssq_sum_mean

/STATISTICS = MEAN STDDEV MIN MAX.

* Calculate mean of sum scores across both time points.

COMPUTE IPQ_mean_total = MEAN(ipq_mean_1, ipq_mean_9).

EXECUTE.


*EXPOSURE MEAN TIME AND QUALITY
*Coding missing values to 0 in eksponering_antalminutter

eksponering_antalminutter = exposure in minutes

* Replace missing values with 0 for eksponering_antalminutter.1.

IF (MISSING(eksponering_antalminutter.1)) eksponering_antalminutter.1 = 0.

EXECUTE.

* Replace missing values with 0 for eksponering_antalminutter.1.

IF (MISSING(eksponering_antalminutter.4)) eksponering_antalminutter.4 = 0.

EXECUTE.

* Replace missing values with 0 for eksponering_antalminutter.1.

IF (MISSING(eksponering_antalminutter.2)) eksponering_antalminutter.2 = 0.

EXECUTE.

* Replace missing values with 0 for eksponering_antalminutter.1.

IF (MISSING(eksponering_antalminutter.3)) eksponering_antalminutter.3 = 0.

EXECUTE.

* Replace missing values with 0 for eksponering_antalminutter.1.

IF (MISSING(eksponering_antalminutter.5)) eksponering_antalminutter.5 = 0.

EXECUTE.

* Replace missing values with 0 for eksponering_antalminutter.1.

IF (MISSING(eksponering_antalminutter.6)) eksponering_antalminutter.6 = 0.

EXECUTE.

* Replace missing values with 0 for eksponering_antalminutter.1.

IF (MISSING(eksponering_antalminutter.7)) eksponering_antalminutter.7 = 0.

EXECUTE.

* Replace missing values with 0 for eksponering_antalminutter.1.

IF (MISSING(eksponering_antalminutter.8)) eksponering_antalminutter.8 = 0.

EXECUTE.

* Replace missing values with 0 for eksponering_antalminutter.1.

IF (MISSING(eksponering_antalminutter.9)) eksponering_antalminutter.9 = 0.

EXECUTE.

* Replace missing values with 0 for eksponering_antalminutter.1.

IF (MISSING(eksponering_antalminutter.10)) eksponering_antalminutter.10 = 0.

EXECUTE.

* Compute the mean of eksponering minutes assuming that missing = no exposure

* Compute mean of eksponering_antalminutter variables.

COMPUTE eksponering_mean_minutes = MEAN(eksponering_antalminutter.1, eksponering_antalminutter.2, eksponering_antalminutter.3,

eksponering_antalminutter.4, eksponering_antalminutter.5,

eksponering_antalminutter.6, eksponering_antalminutter.7,

eksponering_antalminutter.8, eksponering_antalminutter.9,

eksponering_antalminutter.10).

* Set eksponering_mean_minutes to 0 if all values are 0.

IF (eksponering_mean_minutes = MISSING AND

(eksponering_antalminutter.1 = 0 AND eksponering_antalminutter.2 = 0 AND

eksponering_antalminutter.3 = 0 AND eksponering_antalminutter.4 = 0 AND

eksponering_antalminutter.5 = 0 AND eksponering_antalminutter.6 = 0 AND

eksponering_antalminutter.7 = 0 AND eksponering_antalminutter.8 = 0 AND

eksponering_antalminutter.9 = 0 AND eksponering_antalminutter.10 = 0))

eksponering_mean_minutes = 0.

EXECUTE.

* Compute the mean of eksponering_kvalitet.1 to eksponering_kvalitet.10.

eksponering_kvalitet = Quality of exposure

COMPUTE eksponering_kvalitet_mean = MEAN(eksponering_kvalitet.1, eksponering_kvalitet.2, eksponering_kvalitet.3,

eksponering_kvalitet.4, eksponering_kvalitet.5, eksponering_kvalitet.6,

eksponering_kvalitet.7, eksponering_kvalitet.8, eksponering_kvalitet.9,

eksponering_kvalitet.10).

EXECUTE.

*TESTING ASSUMPTION OF NORMALITY =

EXAMINE VARIABLES = eksponering_kvalitet_mean eksponering_ minutes_sum antal_sessioner

BY assignment

/PLOT = NPPLOT

/STATISTICS = DESCRIPTIVES

/CINTERVAL = 95

/MISSING = PAIRWISE

/NOTOTAL.

* Log transformation of specified variables.

COMPUTE log_eksponering_kvalitet_mean = LG10(eksponering_kvalitet_mean+1).

EXECUTE.

COMPUTE log_eksponering_minutes_sum = LG10(eksponering_minutes_sum+1).

EXECUTE.

COMPUTE log_antal_sessioner = LG10(antal_sessioner+1).

EXECUTE.

*ASSUMPTIONS INDICATE THE NEED FOR NON-PARAMETRIC TEST

*DESCRIPTIVES

EXAMINE VARIABLES = eksponering_kvalitet_mean eksponering_minutes_sum antal_sessioner

BY assignment

/PLOT = NPPLOT

/STATISTICS = DESCRIPTIVES

/CINTERVAL = 95

/MISSING = PAIRWISE

/NOTOTAL.

* Mann-Whitney U test for non-parametric comparison between groups.

NPAR TESTS

/MANN-WHITNEY = eksponering_kvalitet_mean eksponering_minutes_sum antal_sessioner BY assignment(1, 2)

/MISSING ANALYSIS.

*Crosstabs for categorical variables with Chi-Square tests for session_category

* Recode projekt_sessioner_v2_no_missing into session_category.

RECODE projekt_sessioner_v2_no_missing (0=0) (1 THRU 9=1) (10=2) INTO session_category.

VALUE LABELS session_category

0 'non-attending'

1 'discontinued'

2 'full treatment'.

EXECUTE.

CROSSTABS

/TABLES=session_category BY assignment

/FORMAT=AVALUE TABLES

/STATISTICS=CHISQ

/CELLS=COUNT ROW

/COUNT ROUND CELL.

UPDATED SYNTAX FOR REPORTING:

EXAMINE VARIABLES = eksponering_kvalitet_mean eksponering_minutes_sum antal_sessioner

BY assignment

/PLOT = NPPLOT

/STATISTICS = DESCRIPTIVES

/CINTERVAL = 95

/MISSING = PAIRWISE

/NOTOTAL.

NPAR TESTS

/MANN-WHITNEY = eksponering_kvalitet_mean eksponering_minutes_sum antal_sessioner BY assignment(1, 2)

/MISSING ANALYSIS.

CROSSTABS

/TABLES=session_category BY assignment

/FORMAT=AVALUE TABLES

/STATISTICS=CHISQ

/CELLS=COUNT COLUMN

/COUNT ROUND CELL

/METHOD=EXACT
