# Supplementary material for: Face Your Fears: Virtual reality-based cognitive behavioral therapy (VR-CBT) versus standard CBT for paranoia in patients with schizophrenia spectrum disorders: Results of a randomized clinical trial
Source: Research Square preprint supplement (doi:10.21203/rs.3.rs-5593252/v1), 2024-12-12
Supplement: Supplementary file 4 [file c106c22594e94e7dad74fe84.docx]

Attrition analyses

| Variable | Participated in treatment cessation assessment (3 months) | Did not participate in treatment cessation assessment (3 months) |
| --- | --- | --- |
|  |  |  |
| Age (years) |  |  |
| Sex |  |  |
| Outpatient care setting |  |  |
| Occupational status |  |  |
| Diagnosis |  |  |
| Olanzapine equivalent (mg/day) |  |  |
| TALE (only statistically significant findings are listed here) |  |  |
| Sexual abuse before age 16 |  | Statistically significant higher proportion |
| Distressing experiences in the psychiatric ystem |  | Statistically significant higher proportion |
| Psychoactive substances – last week |  |  |
| Alcohol intake units/week – last week |  |  |
| Self-harm – last week |  |  |
| Other psychotherapeutic intervention during intervention period |  |  |
| Admission during intervention period (days) |  |  |
|  |  |  |
| GPTS – persecution |  |  |
|  |  |  |
| GPTS – social self-reference |  |  |
| GPTS-R - persecution |  |  |
| GPTS-R – social self-reference |  |  |
| PSP |  |  |
| SBQ |  |  |
| ERT |  |  |
| SIAS |  |  |
|  |  |  |
| SAPS |  |  |
| BNSS |  |  |
| CDSS |  | Statistically significant higher score |
| COGDIS |  |  |
|  |  |  |
| Trustworthiness |  |  |
| SSPA |  |  |
| IBT |  |  |
|  |  |  |
| SIDAS |  |  |
| BCSS |  |  |
| DACOBS |  |  |
| SFS |  |  |
| GSE |  | Statistically significant higher lower score |
| EQ-5D-5L |  |  |
| WHO |  | Statistically significant higher lower score |
| Big-5 |  |  |
| Openness |  |  |
| Concientciousness |  | Statistically significant higher lower score |
| Extraversion |  |  |
| Agreeableness |  |  |
| Neuroticism |  | Statistically significant higher score |
